1     **Ancestral class-promiscuity as a driver of functional diversity in the**  
2                     **BAHD acyltransferase family in plants**

3     Lars H. Kruse<sup>1</sup>, Austin T. Weigle<sup>3</sup>, Jesús Martínez-Gómez<sup>1,2</sup>, Jason D. Chobirko<sup>1,5</sup>, Jason  
4     E. Schaffer<sup>6</sup>, Alexandra A. Bennett<sup>1,7</sup>, Chelsea D. Specht<sup>1,2</sup>, Joseph M. Jez<sup>6</sup>, Diwakar  
5     Shukla<sup>4</sup>, Gaurav D. Moghe<sup>1\*</sup>

6     **Footnotes:**

7     <sup>1</sup> Plant Biology Section, School of Integrative Plant Sciences, Cornell University, Ithaca,  
8     NY, 14853, USA

9     <sup>2</sup> L.H. Bailey Hortorium, Cornell University, Ithaca, NY, 14853, USA

10    <sup>3</sup> Department of Chemistry, University of Illinois at Urbana-Champaign, Urbana, IL, 61801,  
11    USA

12    <sup>4</sup> Department of Chemical and Biomolecular Engineering, University of Illinois at Urbana-  
13    Champaign, Urbana, IL, 61801, USA

14    <sup>5</sup> Present address: Department of Molecular Biology and Genetics, Cornell University,  
15    Ithaca, NY, 14853, USA

16    <sup>6</sup> Department of Biology, Washington University in St. Louis, St. Louis, MO, 63130, USA

17    <sup>7</sup> Present address: Institute of Analytical Chemistry, Universität für Bodenkultur Wien,  
18    Vienna, 1190, Austria

19

20    \* Corresponding author: [gdm67@cornell.edu](mailto:gdm67@cornell.edu)

21

## 22 **ABSTRACT**

23 Gene duplication-divergence and enzyme promiscuity drive metabolic diversification in  
24 plants, but how they contribute to functional innovation in enzyme families is not clearly  
25 understood. In this study, we addressed this question using the large BAHD  
26 acyltransferase family as a model. This fast-evolving family, which uses diverse  
27 substrates, expanded drastically during land plant evolution. *In vitro* characterization of  
28 11 BAHDs against a substrate panel and phylogenetic analyses revealed that the  
29 ancestral enzymes prior to origin of land plants were likely capable of promiscuously  
30 utilizing most of the substrate classes used by current, largely specialized enzymes. Motif  
31 enrichment analysis in anthocyanin/flavonoid-acylating BAHDs helped identify two motifs  
32 that potentially contributed to specialization of the ancestral anthocyanin-acylation  
33 capability. Molecular dynamic simulations and enzyme kinetics further resolved the  
34 potential roles of these motifs in the path towards specialization. Our results illuminate  
35 how promiscuity in robust and evolvable enzymes contributes to functional diversity in  
36 enzyme families.

## 37 **KEY WORDS**

38 Evolutionary biochemistry, enzyme family, comparative genomics, gene duplication,  
39 promiscuity, protein structure analysis, BAHD acyltransferase

40

## 41 **INTRODUCTION**

42 Enzymes involved in plant specialized metabolism often belong to enzyme  
43 families, some of whom (e.g. cytochrome P450s, lipases, acyltransferases,  
44 dioxygenases) have several hundred members in angiosperm genomes. Such enzyme  
45 families are characterized by frequent gene duplication, functional divergence, and  
46 promiscuity, all of which contribute to metabolic diversification. For duplication, various  
47 models explaining duplicate gene evolution have been proposed, such as neo-  
48 functionalization, sub-functionalization, escape from adaptive conflict, dosage balance,  
49 and pseudogenization (reviewed in Panchy et al., 2016). Due to advances in sequencing  
50 technologies, much is known today about how duplicates evolve at the genomic,  
51 epigenetic and transcriptomic levels (Ganko et al., 2007; Zou et al., 2009; Schnable et  
52 al., 2011; Moghe et al., 2014; J. Wang et al., 2014); however, our understanding of how  
53 substrate preference evolves in duplicate enzymes, especially in large enzyme families  
54 is lacking. Specifically, while it is common knowledge that different members of large  
55 enzyme families use substrates containing very different chemical/structural scaffolds,  
56 the extent to which this “family multi-functionality” or functional diversity is due to ancestral  
57 promiscuity vs. neo-functionalization after duplication is not clear.

58 Promiscuity refers to the ability of an enzyme to catalyze multiple reactions, either  
59 by using different substrates (substrate promiscuity), producing multiple products from  
60 the same substrate (product promiscuity), or performing secondary reactions that cause  
61 different chemical transformations (catalytic promiscuity) (Copley, 2015). Here, we do not  
62 consider the physiological relevance of the secondary products but only study an  
63 enzyme’s ability to use multiple substrates – a definition of promiscuity typically used by  
64 molecular/structural biologists (Copley, 2015; Kreis and Munkert, 2019). We also define  
65 a special type of substrate promiscuity called “class-promiscuity”, referring to the ability  
66 of an enzyme to use substrates containing very different structural scaffolds e.g. aliphatic  
67 alcohol vs. anthocyanin. In contrast, the term “multi-functionality” is used here in the  
68 context of the collective enzyme family using multiple substrates e.g. multi-functionality  
69 of the BAHD family. Even if the product at first is irrelevant in a physiological context, the  
70 promiscuous reaction may still continue to occur and may get selected upon if the product  
71 directly or indirectly increases organismal fitness. Existence of such promiscuity-driven

72 “underground metabolism” can occur via drift and contributes to the standing natural  
73 variation of metabolites (Notebaart et al., 2014).

74 In this study, we address the question of how gene duplication and promiscuity  
75 contribute to plant specialized metabolic diversity using the large BAHD acyltransferase  
76 family (referred to as BAHDs hereafter) as a model. The ease of heterologous protein  
77 expression in *Escherichia coli*, intronless nature of many BAHD genes, their ability to use  
78 structurally diverse substrates, and availability of functional data from multiple species  
79 make this an attractive family to address the above question. Named after the four first  
80 discovered enzymes of this family – benzyl alcohol O-acetyltransferase (BEAT)  
81 (Dudareva et al., 1998), anthocyanin O-hydroxycinnamoyltransferase (AHCT) (Fujiwara  
82 et al., 1997; H. Fujiwara et al., 1998; Hiroyuki Fujiwara et al., 1998), N-  
83 hydroxycinnamoyl/benzoyltransferase (HCBT) (Yang et al., 1997), and deacetylindoline  
84 4-O-acetyltransferase (DAT) – members of this large family (referred to as BAHDs  
85 hereafter) catalyze the transfer of an acyl group from a coenzyme A (CoA) conjugated  
86 donor to a –OH or –NH<sub>2</sub> group on an acceptor (D’Auria, 2006). BAHDs play important  
87 roles in the biosynthesis of several phenylpropanoids, amides, volatile esters, terpenoids,  
88 alkaloids, anthocyanins, flavonoids, and acylsugars (D’Auria, 2006; Tuominen et al.,  
89 2011). Although >150 members of this family have been experimentally characterized  
90 across the plant kingdom, transfer of known functions using sequence similarity to these  
91 characterized enzymes is difficult owing to their rapid sequence divergence, substrate  
92 promiscuity and functional divergence. For example, the 4-5 acylsugar acyltransferases  
93 involved in acylsugar biosynthesis in Solanaceae trichomes are BAHDs (Moghe et al.,  
94 2017) but are only 40-50% identical, and yet all of them use sucrose/acylated sucrose as  
95 substrates. In contrast, a single amino acid change is sufficient to convert a BAHD from  
96 preferentially using phenylpropanoid substrates to using phenolic amine substrates  
97 (Levsh et al., 2016). Compared to the scale of BAHD acceptor diversity, there is an  
98 incomplete understanding of BAHD sequence-function and structure-function  
99 relationships, which is representative of a similar lack of knowledge in other large enzyme  
100 families generated via gene duplication.

101 Previous studies on BAHDs have revealed existence of substrate promiscuity  
102 (Aharoni et al., 2000; Aymerick Eudes et al., 2016; Levsh et al., 2016; Moghe et al., 2017;



103 Chiang et al., 2018a), but compared to the known number of BAHD substrates, the extent  
104 of our knowledge about BAHD class-promiscuity is still limited. Furthermore, it is unclear  
105 whether BAHD multi-functionality is a result of multiple rounds of neo-functionalization –  
106 where new activities emerged completely afresh in the BAHD family (also referred to  
107 below as “innovation”) – vs. specialization of activities that were already possible in the  
108 common ancestor.

109 The BAHD family is speculated to have arisen from carnitine acyltransferases  
110 involved in fatty acid metabolism (St Pierre and De Luca, 2000; D’Auria, 2006), however,  
111 their evolution across plants has not been studied. We were interested in characterizing  
112 evolution of the *capability/potential* of BAHDs to use different substrate classes rather  
113 than their *actual in vivo* substrates, since the inherent capability of an enzyme can be a  
114 starting point for selection to act and fix diversified enzyme activities in different *in vivo*  
115 contexts. Although it may be argued that BAHDs might use any substrates with hydroxyl  
116 or amine groups, previous results provide clear evidence of specialization (D’Auria, 2006),  
117 and it is unclear how these specializations emerged. We first characterized the known  
118 substrate space of extant characterized BAHDs and used it as a template in the context  
119 of BAHD phylogeny to delineate the putative ancestral substrate space. Prediction of the  
120 ancestral state helped us differentiate between neo-functionalization vs. ancestral  
121 promiscuity, and the sequence and structural features that enabled specialization of  
122 ancestrally accessible functions. Overall, this study provides a template to assess  
123 functional evolution after duplication in large enzyme families, and generates resources  
124 foundational for rational prediction of BAHD function in plant genomes.

125

## 126 **RESULTS**

### 127 ***The BAHD enzyme family occupies a wide substrate space***

128 BAHDs have been experimentally characterized across land plants (Sander and  
129 Petersen, 2011; Aymerick Eudes et al., 2016; Levsh et al., 2016; Moghe et al., 2017;  
130 Chiang et al., 2018a). To get a complete picture of the range of known BAHD substrates,  
131 we first compiled a database of 136 biochemically characterized BAHDs that used a total  
132 of 187 acceptor substrates and ~30 acyl donor substrates from 64 species across the

133 green plants (**File S2**). BAHDs characterized solely using other types of experimental  
 134 evidence such as gene knock-out and knock-down, or gene expression analysis were  
 135 excluded from this study, because of the remaining uncertainty about the actual substrate  
 136 the enzyme is acting on. These substrates were empirically classified into thirteen

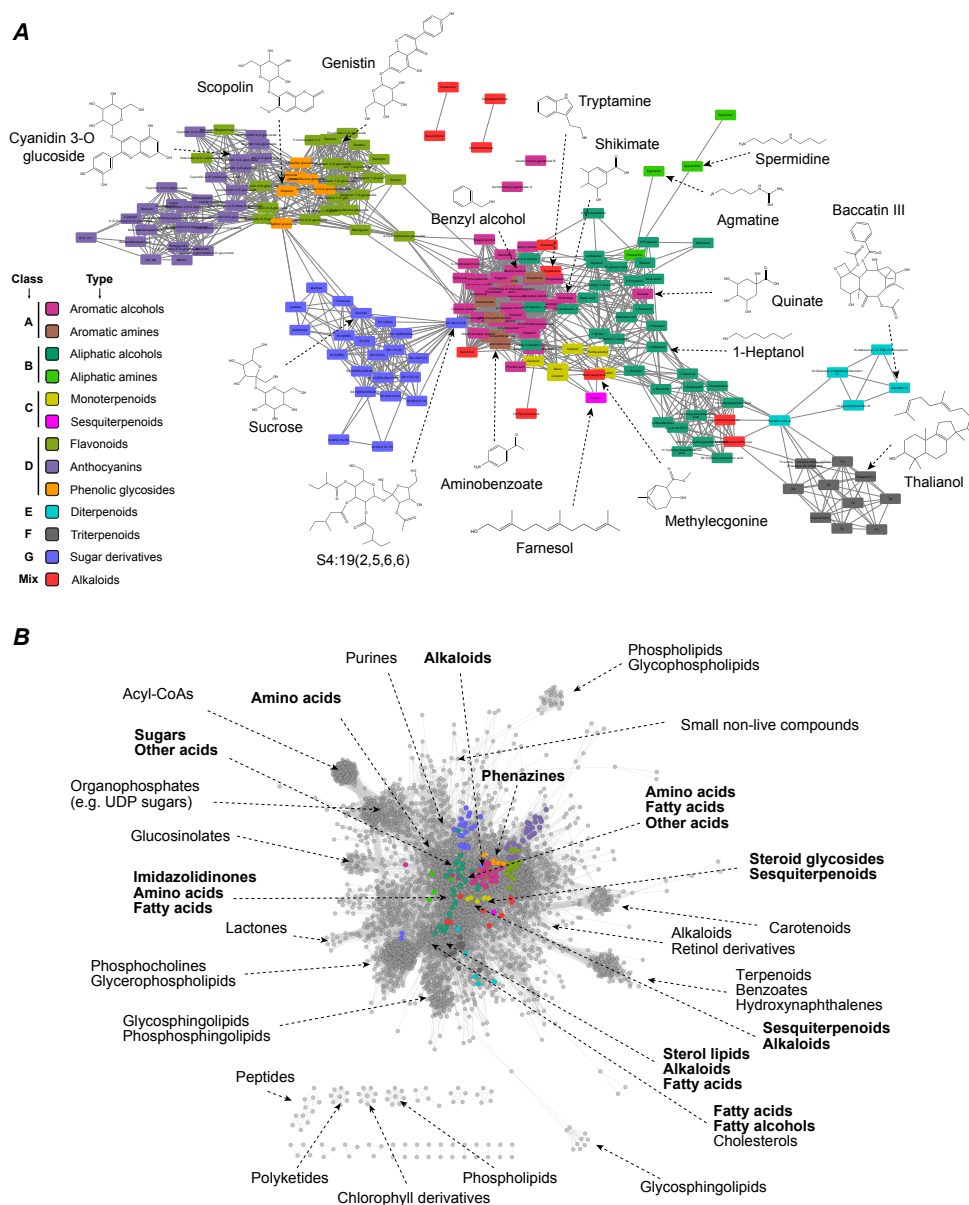

**Figure 1. BAHD substrate space.** (A) Substrate similarity network of BAHD acceptor substrates (**File S2B**), shown as the “Prefuse Force Directed” layout in Cytoscape. An MCS-Tanimoto similarity cutoff of 0.5 used to draw edges between two substrate nodes. Substrates are colored based on the substrate type they belong to. (B) BAHD substrates in the context of a larger network of plant compounds. Plant compounds with KNApSAcK ID were gathered from the ChEBI database. The network was visualized as in part A and BAHD substrates are highlighted by colors corresponding to their substrate class. For each labeled cluster/region in the network, five compounds were chosen randomly and the compound class for each compound was determined based on the ChEBI Ontology (see **File S2**). Representative classes are shown for each analyzed region. Names in bold are the classes closest to the known BAHD substrates.

137 different types based on similarity of their chemical scaffolds and functional groups (**Table**  
138 **S1; Fig. S1A**) (Wang et al., 2013), and organized into a network for visualization of the  
139 already characterized BAHD substrate space (**Fig. 1A; Fig. S1B**).

140 Distinct clusters obtained in this visualization suggested that BAHDs have evolved  
141 to accept at least eight different structural scaffolds (**classes A-G-Mix; Fig. 1A**). A  
142 majority (109, 80%) of the characterized enzymes use substrates in four classes – class  
143 A comprising of aromatic alcohol and amines (69 enzymes, 51%), class B containing  
144 aliphatic alcohols and amines (38 enzymes, 28%), class C that includes monoterpenoids  
145 and a sesquiterpenoid (7 enzymes, 5%), and class D comprising flavonoids,  
146 anthocyanins, and phenolic glycosides (38 enzymes, 28%) (**Fig. 1A; File S2B**) – roughly  
147 indicative of the degree of research attention on lignins, cuticular lipids, floral volatiles and  
148 pigments, respectively. BAHDs can also transform a wider array of terpenoids including  
149 monoterpenoid (e.g. geraniol), diterpenoid (e.g. taxol intermediates), and triterpenoid  
150 alcohols (e.g. thalianol) in classes E and F. Some polyamines (spermine, spermidine)  
151 were more distant from aliphatic alcohols primarily due to different functional groups (-OH  
152 vs. -NH<sub>2</sub>), but still were classified into the same class B due to overall scaffold relatedness  
153 (**Fig. S1A; Table S1**). Other substrates such as alkaloids (class Mix) and sugar  
154 derivatives (class G), represented smaller and independent classes in the network.  
155 Alkaloids themselves are a loosely defined compound type, and hence class Mix  
156 comprises of alkaloids that could actually be assigned to other classes.

157 Although large, the characterized BAHD substrate space still only represents a  
158 small proportion of the larger phytochemical space. As described in a later section, only  
159 ~50% of all multi-species BAHD orthologous groups (OGs) have characterized activities,  
160 which suggests that many substrate classes remain undiscovered. We thus used the  
161 substrate network to obtain a bird's eye view of known BAHD substrates in the context of  
162 the wider phytochemical space. Using 7128 additional plant-specific compounds, we  
163 mapped a broader phytochemical similarity network (**Fig. 1B**). Since BAHDs can only use  
164 substrates containing amine or hydroxyl groups, only ~70% of the compounds from this  
165 pool are actually available to them.

166 Previous studies recognize the role of substrate ambiguity and structural motifs in  
167 generating secondary reactions (Bar-Even et al., 2011), which, under appropriate

168 conditions, can be selected upon. An investigation of the global “underground  
169 metabolism” found that promiscuously used substrates of *E. coli* enzymes tend to be  
170 structurally similar (Notebaart et al., 2014). Based on these observations, we divided  
171 compounds in the above phytochemical network (**Fig. 1B**) into three groups: (1) known  
172 BAHD substrate classes; these classes are spread out over a large region of the  
173 phytochemical space (**colored nodes, Fig. 1B**), which potentially allows for transitions to  
174 new substrate classes through mutational changes, (2) compound classes that are  
175 theoretically accessible – due to similarity to known substrates – but not yet known as  
176 BAHD substrates, such as small organic acids in central metabolism, some amino acids,  
177 nitrogen bases/nucleosides, many alkaloids, sesquiterpenoids, peptides, polyphenols,  
178 and oligosaccharides (**Fig. 1B; File S3**), and (3) compound classes whose utilization  
179 cannot be inferred due to absence of prior data or are unlikely to be BAHD substrates. As  
180 far as we could determine, no biochemical or genetic studies have identified BAHDs using  
181 sulfur/phosphorus containing compounds (e.g. glucosinolates, nucleotides) and long-  
182 chain lipid types (e.g. sulfolipids, sphingolipids, carotenoids/tetraterpenoids) as acyl  
183 acceptor substrates – despite some members having hydroxyl groups – and hence, these  
184 substrate classes were categorized into group 3. From groups 2 and 3, some substrate  
185 types may be inaccessible to BAHDs due to their lipophilic nature or their absence in  
186 cytoplasmic environments where most BAHDs are known to exist. Nonetheless, such  
187 visualization of the larger network shows that several metabolite classes are structurally  
188 very similar to existing BAHD substrates, and represent the latent catalytic potential of  
189 BAHDs that could be selected upon after duplication-divergence or could be used for *in*  
190 *vitro* enzyme engineering. These activities may still lie undetected in uncharacterized  
191 enzymes or as secondary activities of characterized enzymes.

192 To address our questions about class-promiscuity, we further assessed enzymes  
193 accepting class A, B and D substrates, which are structurally very distinct (**Fig. 1A**). Three  
194 enzymes utilizing class A substrates (AtHCT, SmHCT, PsHCT2) were previously shown  
195 in one study to use naringenin, a flavonoid (Chiang et al., 2018a). No class D substrate  
196 utilizing enzyme was shown to use class A/B substrates (**File S2A**). While this difference  
197 could represent true functional differentiation, it may likely be a result of experimenter-  
198 bias (i.e. researchers studying pigmentation may not assess lignin or volatile esters (class

199 A/B substrates), and vice versa). To minimize the effect of such a bias on our later  
200 evolutionary inferences, we performed extensive characterization of 11 BAHDs that use  
201 class A, B and D substrates and obtained better insights into promiscuity of BAHD  
202 enzymes.

203

### 204 ***Determining the class-promiscuity of characterized BAHDs***

205 We tested a total of 11 novel and previously characterized BAHD enzymes against  
206 an acceptor substrate array (**Fig. S2**), using optimal conditions described for those  
207 enzymes. For donors, we selected the most preferred donor of each tested enzyme,  
208 which, for most enzymes was coumaroyl-CoA or malonyl-CoA. Cocaine synthase from  
209 *Erythroxylum coca* (EcCS) was described to use benzoyl-CoA and cinnamoyl-CoA to  
210 produce cocaine from methylecgonine (Schmidt et al., 2015; A. Eudes et al., 2016), but  
211 in our enzyme assays, we discovered that it is also able to use coumaroyl-CoA (**Fig. S2**).  
212 For the hydroxyacid/alcohol hydroxycinnamoyl transferase of the liverwort *Marchantia*  
213 *emarginata* (MeHFT), we used its preferred donor feruloyl-CoA. Based on the substrate  
214 networks (**Fig. 1A; Fig. S1**), we selected 11 substrates from six substrate types in classes  
215 A, B and D as acceptors for initial analysis, and based on these results, further assayed  
216 some enzymes with additional anthocyanin and terpenoid substrates (**Fig. S2B,C**) to  
217 confirm additional hypotheses.

218 Of the eleven enzymes, two used only one tested substrate, six showed substrate  
219 promiscuity within the same class (which we also refer to as “specialized” below), while  
220 three showed class-promiscuity (**Fig. 2A; Fig. S2**) According to our assays and gathered  
221 literature information (**Fig. 4**), 75% (103 enzymes) of BAHDs analyzed in this study can  
222 use more than one acceptor substrate, 27% (37 enzymes) use  $\geq 5$  substrates, and 9%  
223 (12 enzymes) can use  $\geq 10$  substrates, highlighting the considerable substrate promiscuity  
224 in the family. One of the two enzymes using only one substrate was a previously  
225 uncharacterized enzyme from the outgroup species selected for this study *Chara braunii*  
226 – representing charophytic algae, the most closely related sister lineage to land plants  
227 (Cheng et al., 2019; Donoghue and Paps, 2020; Vries and Rensing, 2020). Under the  
228 testing conditions, this enzyme exclusively accepted quinate (an aromatic alcohol) (**Fig.**  
229 **2A,C; Fig. S2A**), leading us to rename this enzyme as CbHQT-like. This observation,

230 coupled with the evolutionary analysis performed below, suggests that activities essential  
 231 for monolignol biosynthesis in land plants (Weng and Chapple, 2010; Renault et al., 2019)

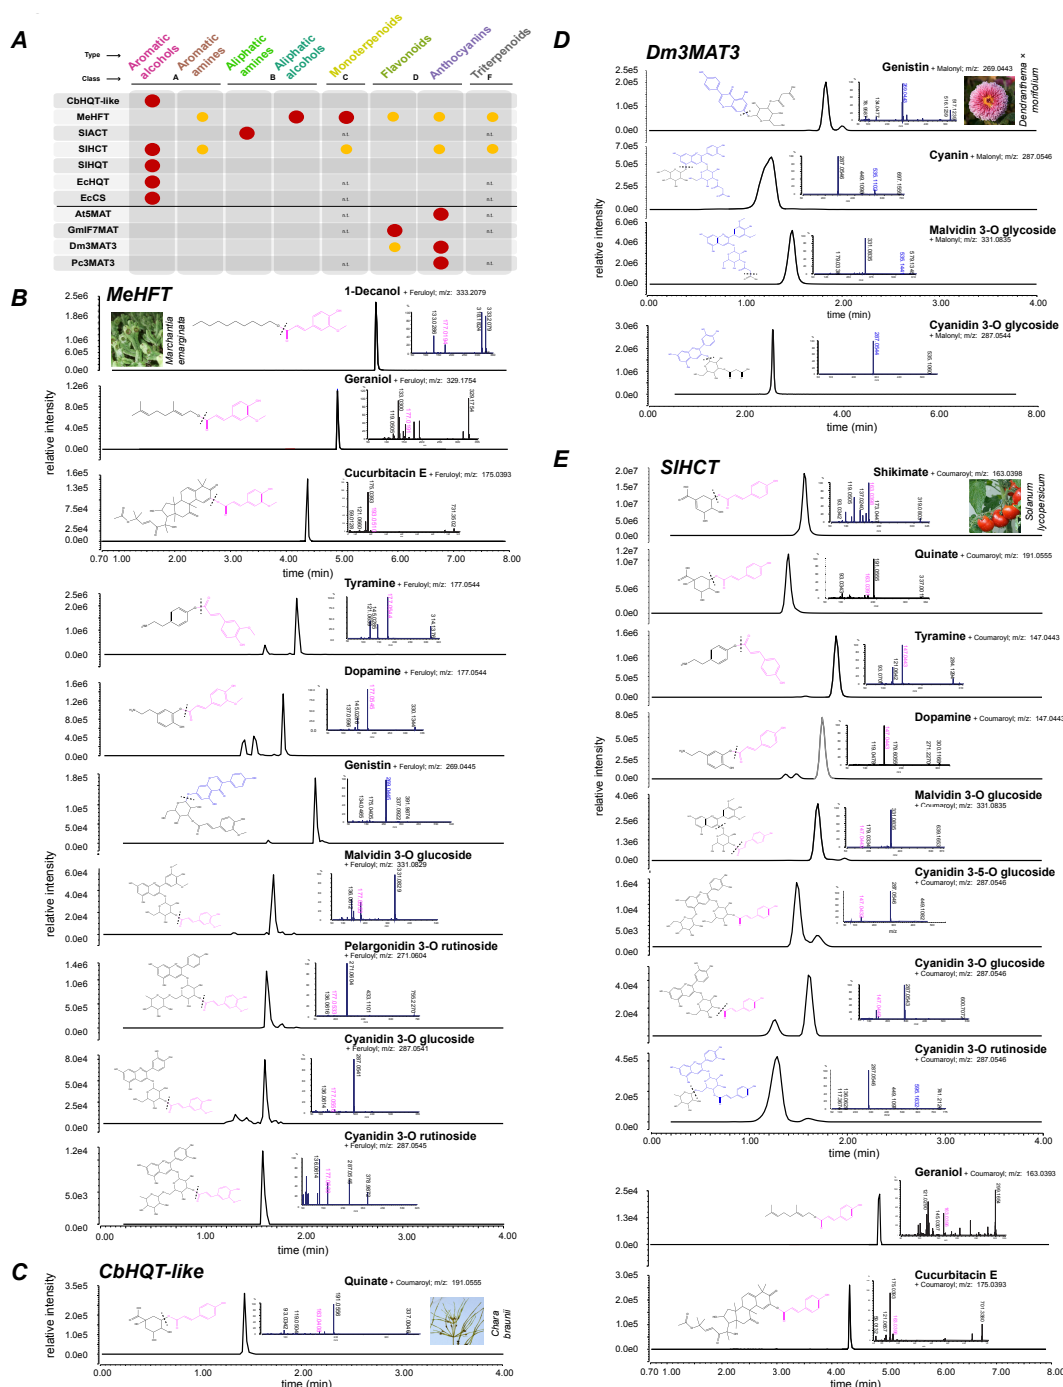

**Figure 2. Enzyme activities of selected enzyme representatives. (A)** Matrix of tested enzymes and substrates. Class A/B/C/F substrates are pink, Class D substrates are blue. Larger red circle corresponds to major enzyme activity and smaller orange circles indicate moderate activity. See Fig. S2 for more detailed calculations. n.t. = not tested. **(B-E)** extracted ion chromatograms of the quantifier ions of different enzymatic products of **(B)** MeHFT with its preferred donor feruloyl-CoA **(C)** CbHQT-like using quinate and coumaroyl-CoA **(D)** Dm3MAT3 using malonyl-CoA, and **(E)** SIHCT using coumaroyl-CoA. Each product was measured using product-specific PRM methods (see Table S4) and the most abundant fragment ion was used for quantification. This ion is noted in the upper right corner of each chromatogram. Structures represent the best-inference based on previously reported structures and the observed fragmentation patterns. Species photographs are from following sources: *Chara braunii* (Picture by Rob Palmer released under the CC BY-NC-SA license), *Marchantia emarginata* (Picture by Boon-Chuan Ho), *Dendranthema × morifolium* (Wikimedia Commons released into the public domain), and *Solanum lycopersicum* (no license attached).



232 existed before the last common ancestor (LCA) of land plants. Given the timescale of  
233 hundreds of millions of years representing the split between charophytes and land plants,  
234 it is possible CbHQT-like specialized for utilizing quinate after the split from land plants.  
235 Alternatively, CbHQT-like might natively use substrates not tested in this study. Further  
236 *in vivo* experiments coupled with untargeted metabolomics could provide further insights  
237 into the functional capacity of algal BAHDs.

238 Three out of eleven tested BAHDs were class-promiscuous. The previously  
239 uncharacterized *Solanum lycopersicum* hydroxycinnamoyl CoA transferase (SIHCT) was  
240 able to acylate shikimate and quinate (aromatic alcohols, class A), dopamine and  
241 tyramine (aromatic amines, class A), geraniol (monoterpenoids, class C), cucurbitacin E  
242 (triterpenoids, class F) as well as malvidin 3-O glucoside, cyanidin-3,5-O diglucoside,  
243 cyanidin 3-O glucoside, and cyanidin 3-O rutinoside (anthocyanins, class D) (**Fig. 2A,E;**  
244 **Fig. S2**). Aromatic alcohol, amine and flavonoid use has been described for HCT-type  
245 enzymes before (Sander and Petersen, 2011; Aymerick Eudes et al., 2016; Levsh et al.,  
246 2016; Peng et al., 2016; Chiang et al., 2018a), but not anthocyanin acylation. No activity  
247 was found with free sucrose or glucose for any of the 11 enzymes, despite evidence of  
248 acylation on the glycoside of the anthocyanin. The liverwort enzyme MeHFT showed a  
249 similarly diverse substrate utilization pattern (**Fig. 2A,E; Fig. S2**). We note that  
250 Cucurbitacin E is not known as a substrate for any known BAHD, but still, both SIHCT  
251 and MeHFT showed significant activity with it. Another enzyme, EcCS which has only  
252 been tested with its native substrate methylecgonine (alkaloid, mix class) (Schmidt et al.,  
253 2015; A. Eudes et al., 2016), showed high specific activities with shikimate and quinate  
254 (class A) – two substrates that are structurally not very similar to methylecgonine (MCS-  
255 Tanimoto = 0.47, **File S2C**). Methylecgonine is most similar to aliphatic alcohols (class B)  
256 – and thus, EcCS can also be considered a class-promiscuous enzyme. These findings  
257 show that some BAHDs have specialized *in vivo* substrate profiles, but have the capability  
258 to explore a large region of the phytochemical space through secondary activities.

259 As opposed to the relatively promiscuous HCT/HQT-type enzymes, the AnAT-type  
260 enzymes show a more specialized substrate usage. All four AnATs, exclusively used  
261 other flavonoid and anthocyanin substrates under the testing conditions (**Fig. 2A,D; Fig.**  
262 **S2A,C**). A previously characterized BAHD (*Dendranthema morifolium* 3-O

263 malonyltransferase, Dm3MAT3) known to malonylate cyanidin 3-O glucoside acylated  
264 other anthocyanins and a flavonoid containing a 3-O glycosylation, and to a lesser extent,  
265 3,5-O glycosylation. At5MAT (5-O malonyltransferase from *Arabidopsis thaliana*) and  
266 Pc3MAT (3-O malonyltransferase from *Pericallis cruenta*) showed the same specificity  
267 with 5-O glycosylated and 3-O glycosylated anthocyanins, respectively. These results  
268 suggest that enzymes that have specialized for class D substrate acylation may have  
269 undergone adaptations constraining them from using class A/B substrates. Since we  
270 tested AnATs using malonyl-CoA donor and class A/B-utilizing enzymes with coumaroyl-  
271 and feruloyl-CoA, we also tested whether these enzymes can acylate aromatic alcohols  
272 and anthocyanins respectively, using non-native donors. We incubated Dm3MAT3 with  
273 coumaroyl-CoA and shikimate or quinate. For comparison, SIHQT and SIACT were  
274 incubated with malonyl-CoA using five different anthocyanin substrates. In both cases,  
275 no product formation was detected (**Fig. S2A,B**). These results suggest that enzymes  
276 transforming substrates in classes A, B and D form two separate groups. While some  
277 class A/B enzymes are able to acylate class D substrates, no evidence was obtained for  
278 the reverse being true. This finding was robust to changes in donor CoAs, which may be  
279 expected considering AnAT-BAHDs are postulated to carry out an ordered bi-bi type of  
280 reaction, with the donor binding first (Shaw and Leslie, 1991; Tanner et al., 1999; Suzuki  
281 et al., 2003).

282         These observations of promiscuity raise questions about how substrate specificity  
283 – especially of broad substrate range enzymes – is maintained *in vivo*. One mechanism  
284 is restricting gene expression – EcCS is specifically expressed in palisade parenchyma  
285 of *E. coca*, which coincides with the highest concentrations of its product cocaine in the  
286 plant (Schmidt et al., 2015). Highly specific expression patterns have been shown before  
287 for BAHDs and other enzymes (e.g. St-Pierre et al., 1999; Kruse et al., 2017). Another  
288 HCT from *Plectranthus scutellarioides* (PshHCT2, previously *Coleus blumei*) maintains  
289 sufficient substrate specificity *in vivo* by using a conserved Arg residue near the active  
290 site as a handle that regulates substrates entry into the active site (Levsh et al., 2016)  
291 through inducing conformational change (Chiang et al., 2018a). Authors also found  
292 evidence for alternative substrate binding sites that increased BAHDs substrate  
293 permissiveness through diffusion of the non-native substrate towards the active site, while



294 maintaining its specialized native function (Chiang et al., 2018a). Other BAHDs may show  
295 similar mechanistic adaptations to maintain *in vivo* substrate specificity.

296 Through these enzyme assays, we found existence of alternate, previously  
297 undocumented scale of BAHD class-promiscuity, which ranged from strong (EcCS using  
298 shikimate) to moderate (SIHCT using malvidin-3-O-glucoside) to weak (MeHFT using  
299 cyanidin-3-O-glucoside) (**Fig. S2**). Such latent capacity of BAHDs, like all enzyme  
300 families, is critical for emergence of new reactions and new metabolites in cellular  
301 environments. We only assayed BAHD promiscuity among the known substrate classes;  
302 however, additional promiscuity existing for structurally related classes (**Fig. 1B**) or under  
303 other conditions may influence BAHD incorporation into new pathways. Enzyme assays  
304 of *C. braunii* HQT-like and MeHFT, coupled with the knowledge of lignin and cutin/suberin  
305 as ancestral polymers in land plants (Renault et al., 2019; Philippe et al., 2020), also  
306 suggested that enzymes utilizing substrates in class A/B were members of an ancestral  
307 clade. To address this hypothesis and determine origins of other activities, we next  
308 studied BAHD family evolution.

309

### 310 ***Functional innovation and expansion in the BAHD acyltransferase family in plants***

311 Through an evolutionary analysis, we asked two questions. First, what was the  
312 ancestral state of the BAHD family in plants? Second, how did the BAHD family expand  
313 and diversify in the plant kingdom? We first identified BAHDs from 49 sequenced plant  
314 genomes using the acyltransferase domain model (PF02458). BAHDs were detected in  
315 1-5 copies in multiple green algal genomes, however, angiosperm and gymnosperm  
316 genomes contain dozens to hundreds of copies, with non-seed plants showing  
317 intermediate BAHD counts (**Fig. 3A,C**). Ancestral state reconstruction of normalized  
318 BAHD counts using a Bounded Brownian Motion model (Boucher and Démery, 2016)  
319 revealed that the relative BAHD gene content began to increase upon origin of the land  
320 plants (**Fig. 3A,B**). The modal BAHD count per thousand genes rose from <1 in algae to  
321 ~1.3 in the ancestor of land plants, increasing to ~3 in the ancestor of seed plants. While  
322 the values for vascular plants and euphyllophytes were intermediate, there was also less  
323 confidence in the specific modal value at these internal nodes, shown by the broad spread  
324 of their distributions. These patterns suggest a gradual increase of relative BAHD count

325 from the origin of land plants to the origin of seed plants, after which the relative counts  
 326 generally stabilized in the genome with some lineage-specific exceptions (**Fig. 3**). We  
 327 thus sought to determine the ancestral state of BAHD activities in the last common  
 328 ancestor of land plants, prior to their expansion.

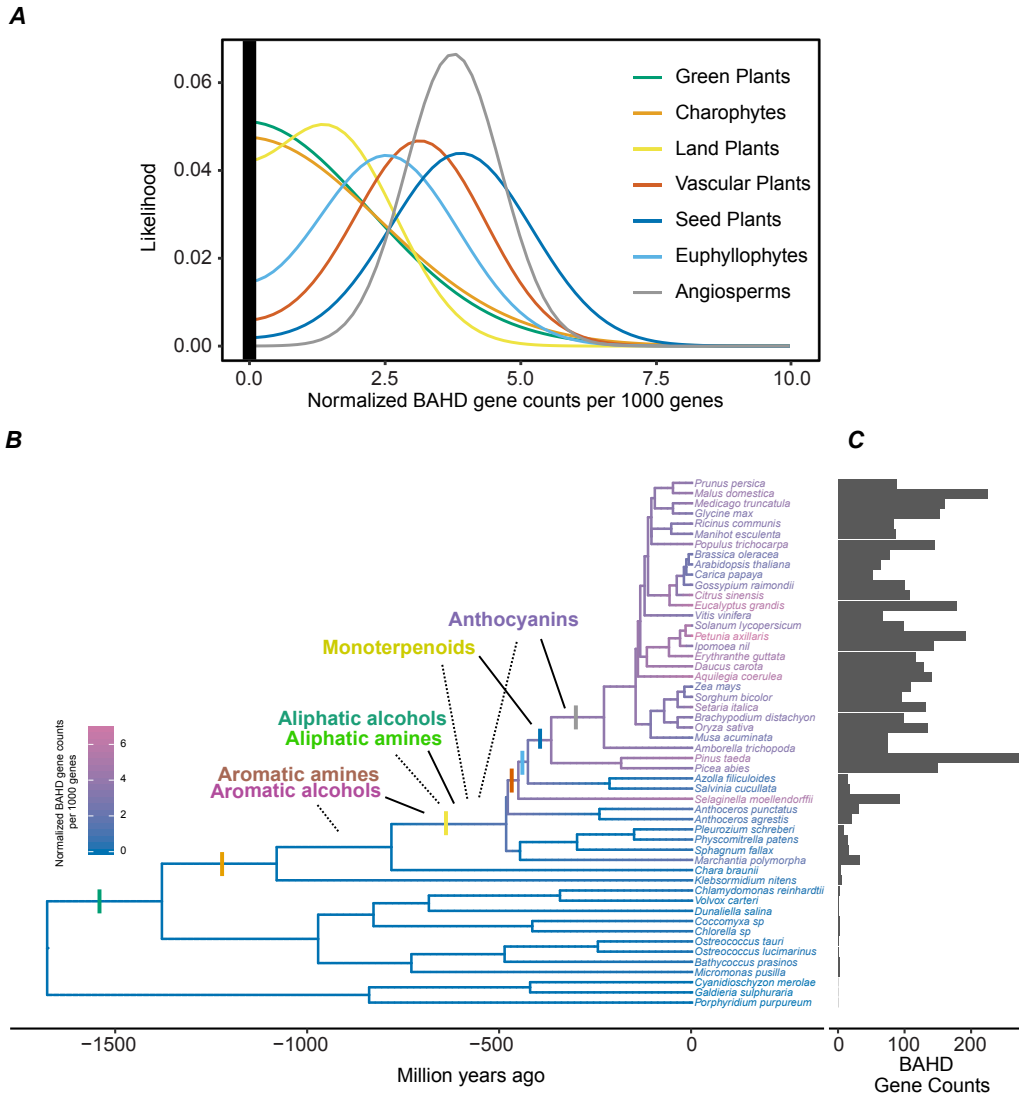

**Figure 3. Number of BAHD acyltransferases in different across the plant phylogeny. (A)** Likelihood of the number of BAHDs per 1000 genes in the genome of different phylogenetic groups, as per the bound Brownian motion model. The corresponding nodes are indicated in **Fig. 3B**. **(B)** Species tree of the analyzed species with sequenced genomes. Color scale of the branches indicates the normalized BAHD count. Maximum extent of OG conservation for each substrate class is highlighted by a solid black line, while tentative assignment of emergence of activities is indicated by the dashed line. See **Fig. 4** and **Fig. 8** for more details. **(C)** Bar graph showing BAHD count per analyzed genome.

329 Ancestral state is typically obtained in two different ways. Performing activity  
330 assays after ancestral sequence resurrection is one approach (Huang et al., 2016).  
331 However, BAHDs are fast evolving enzymes that maintain activity and structural folds  
332 despite undergoing large-scale sequence evolution. Due to such rapid sequence change,  
333 there is very little confidence in amino acid state prediction in deep nodes (example: **File**  
334 **S6**), and thus, ancestral sequence reconstruction or resurrection for deep nodes is not  
335 possible. The second approach – predicting ancestral state based on analyses of  
336 activities of extant enzymes – is also restricted due to poor confidence in many internal  
337 nodes of the BAHD phylogeny and absence of accurate knowledge about extant  
338 character states i.e. absence of knowledge about a substrate’s utilization by an enzyme  
339 could be truly an inability to use the substrate or simply an untested interaction. Thus, we  
340 used a different approach, where we first constructed 765 BAHD OGs across the 49  
341 sequenced plant genomes, of which 132 comprised of >2 members and 89 comprised of  
342 members from >2 species (multi-species OGs). We then used sequence similarity to  
343 assign biochemically characterized enzymes to OGs, thus roughly predicting the OGs  
344 biochemical function at the substrate class utilization level. Depending on the breadth of  
345 conservation of a specific OG, we inferred the deepest internal node in the species tree  
346 likely housing the OG’s associated function. The 136 BAHDs were mapped to only 47  
347 OGs, suggesting that ~50% of the multi-species OGs still have unidentified functions.  
348 While this method enables assignment of discrete states to specific ancestral nodes,  
349 there are no probability estimates associated with the predictions, which is a caveat of  
350 this approach. However, most internal node functional inferences were supported by  
351 multiple characterized BAHDs with the same function (**File S4**), thus providing confidence  
352 in assigning the phylogenetic extent of each clade in the BAHD gene tree (**Fig. 4**).

353 The characterized enzymes can be divided into seven clades with high bootstrap  
354 support, of which four (clades 1-4) are the same as defined previously (D’Auria, 2006).  
355 Clade V in D’Auria, 2006 was divided into three separate clades 5-7 (**Fig. S3**). Three  
356 clades containing HCT/HQT enzymes (clade 5a), alcohol acyltransferases (clade 7a) and  
357 polyamine acyltransferases (clade 4a) were the most widely conserved, with orthologs  
358 extending from angiosperms to liverworts (**Fig. 4**). Clade 5a, most of whose members are  
359 involved in phenylpropanoid pathway and lignin biosynthesis, is – based on branch

360 lengths – under the most purifying selection of all BAHDs (**Fig. S3**), suggesting that  
361 sequence similarity-based, substrate class-level functional prediction of unknown BAHDs  
362 mapping to this clade will likely be accurate. Accurate class-level predictions may also be  
363 possible for clades 1a/b (all but one anthocyanin/flavonoid acylating despite long branch  
364 lengths) and 7a/7b (cuticular wax biosynthesis and slow-evolving), however, other clades  
365 appear to have diverged rapidly at the sequence level as well as for substrate utilization  
366 (**Fig. S3**). A deeper analysis of the sub-clades will be needed to determine their predictive  
367 potential.

368 Combined with substrate preference patterns from our enzyme assays and  
369 previous studies (**Figs. 2,4**), these results suggest that aliphatic and aromatic alcohol and  
370 amine acylating activities (clades 4a, 5a, 7a) were already established in the ancestor of  
371 land plants (**Fig. 3**). At ~1.3 BAHDs per 1000 genes in this ancestor, and given the  
372 predicted gene content of *Chara*, mosses and liverworts, it is possible that ~15-30 BAHDs  
373 may have existed in this ancestor, housing the three clades described above (with  
374 additional uncharacterized/lineage-specific activities). Of these, only the aromatic alcohol  
375 acylating activity was detected in the outgroup species *C. braunii*, providing more support  
376 to the inference that at least this activity was present in the ancestor of all land plants and  
377 perhaps in the LCA of charophytes-land plants. Given the possibility of specialization of  
378 the enzyme in the lineage leading to *C. braunii*, occurrence of other activities (aromatic  
379 amine, aliphatic alcohol and amine acylation) in this ancestor cannot be ruled out.

380 The evolution of the AnAT and terpenoid acylation activities is slightly more  
381 complex. First, the AnAT- and terpenoid-specialized clades have OGs only containing  
382 angiosperm species, but these activities exist in multiple distantly related BAHD clades  
383 (clades 1,3,5,7 and 3,5,6,7, respectively). Second, these activities also exist in MeHFT  
384 and SIHCT clades, whose OGs extend up to liverworts (**Fig. 2B,E, Fig. S2A,B**). Both  
385 observations combined together suggest that AnAT and terpenoid acylation activities may  
386 have been accessible to BAHDs for a long time before their specialization in angiosperms.

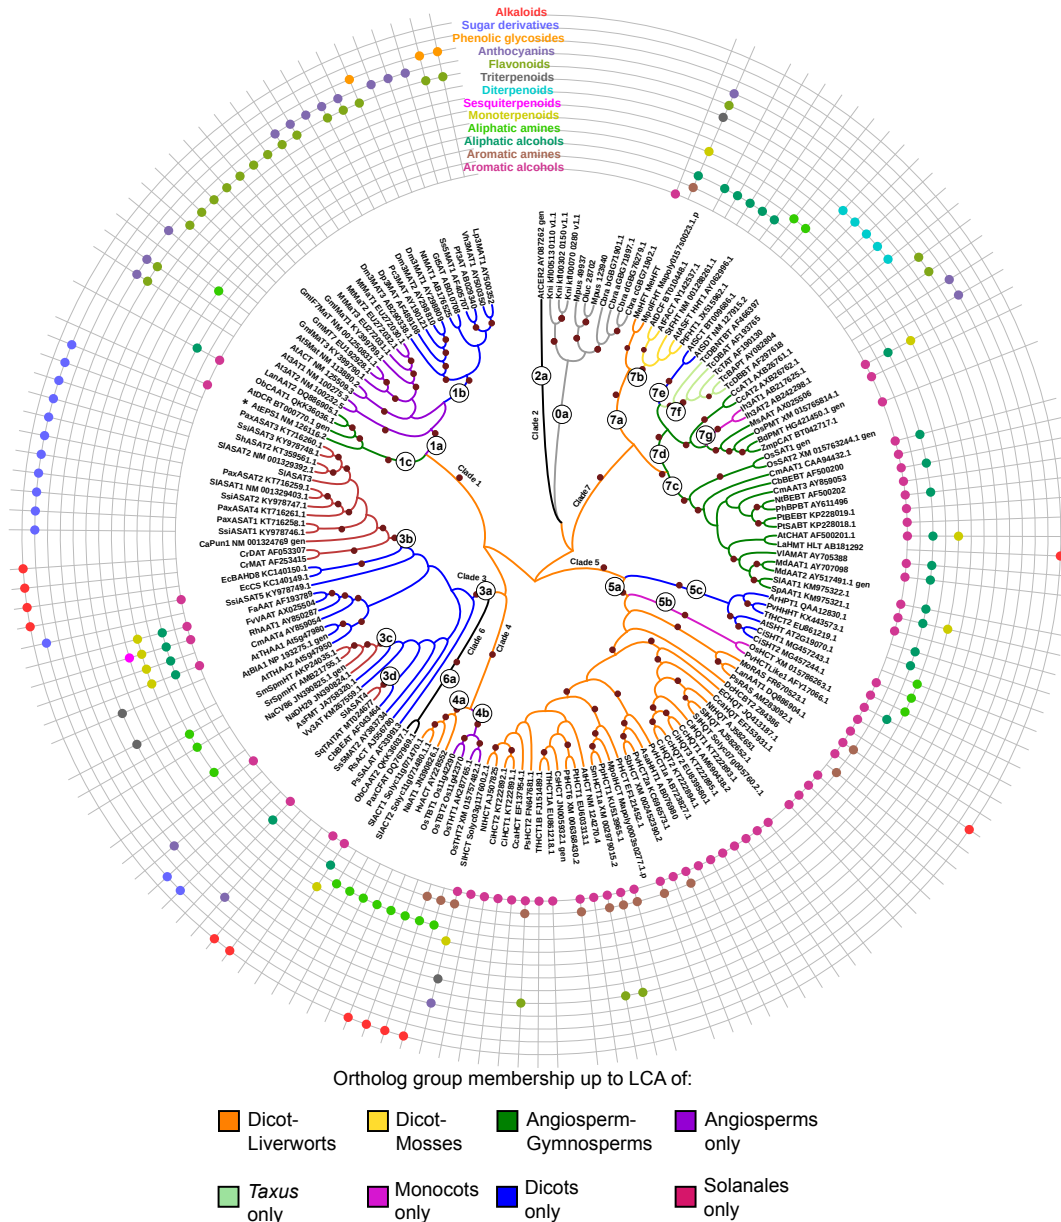

**Figure 4. Defining BAHD clades.** The tree was rooted using the algal enzyme clade (Clade 0a). Maroon circles on branches refer to clades with bootstrap values > 70. Clades were first defined based on deepest, high-confidence monophyletic clades. Clades 1-4 are same as D'Auria et al, 2006 definitions (Fig. S3), while Clade V from that study is divided into Clades 5-7 here, based on the above criterion. Sub-clades were further defined within each clade based on the extent of conservation of OGs across the plant phylogeny (File S3). These clade/sub-clade definitions can be further expanded as new, uncharacterized BAHDs are characterized in the future. Solid circles in the concentric circles around the tree represent activities characterized in this and previous studies, with "gen" referring to genetically characterized BAHDs whose substrates were not considered. \* AtEPS1 shows unusual reaction mechanisms for BAHDs and has an isochorismoyl-glutamate A pyruvoyl-glutamate lyase activity that produces salicylic acid.

## 388 ***Evolution of specialized BAHD activities***

389           Orthology-based ancestral state reconstruction suggested that BAHDs accessed  
390 new substrate classes or specialized in ancestrally accessible classes over their  
391 expansion through gene duplication. Comparisons of OG sequences could thus help  
392 identify specific residues that contributed to functional specialization for a given substrate  
393 class. We first compared the HCT/HQT-like enzymes (clade 5a/b) to amine-acylating  
394 enzymes (clade 4a), both clades being conserved across land plants. We identified 35  
395 residues that were present in >70% of the tested sequences in clade 5a/b but had  
396 completely switched to a different residue in >70% of the tested sequences in clade 4a  
397 **(File S5)**. Of these, only 2 – AtHCT F303L and R356D **(Fig. 5A)** – were close to the active  
398 site, with R356 present in ~90% of clade 5a/b but 0% of clade 4a, being replaced by Asp  
399 or Glu in a majority of clade 4a sequences. The effect of R356D switch was previously  
400 described (Levsh et al., 2016; Chiang et al., 2018b) in several HCTs, which use shikimate  
401 as its primary substrate but do not show activity with aromatic amine substrates. It was  
402 found that this switch was able to convert this enzyme into using amine-containing  
403 substrates. While this promiscuous activity exists in at least some *O*-acylating enzymes  
404 **(Fig. 2, Fig. S2)**, the ubiquity of the R356D mutation in *N*-acylating enzymes suggests  
405 that this residue was critical for specialization towards positively charged substrates  
406 despite alternative binding sites in the protein contributing to increased promiscuity  
407 (Chiang et al., 2018a). For F303L, we found that while 95% of the HCT/HQT-like enzymes  
408 have the Phe residue, this is completely reversed, with 95% of the amine-acylating  
409 enzymes having a Leu residue. Although this residue was not experimentally tested, we  
410 hypothesize that this position also plays an important role in specialization towards the  
411 respective substrates.



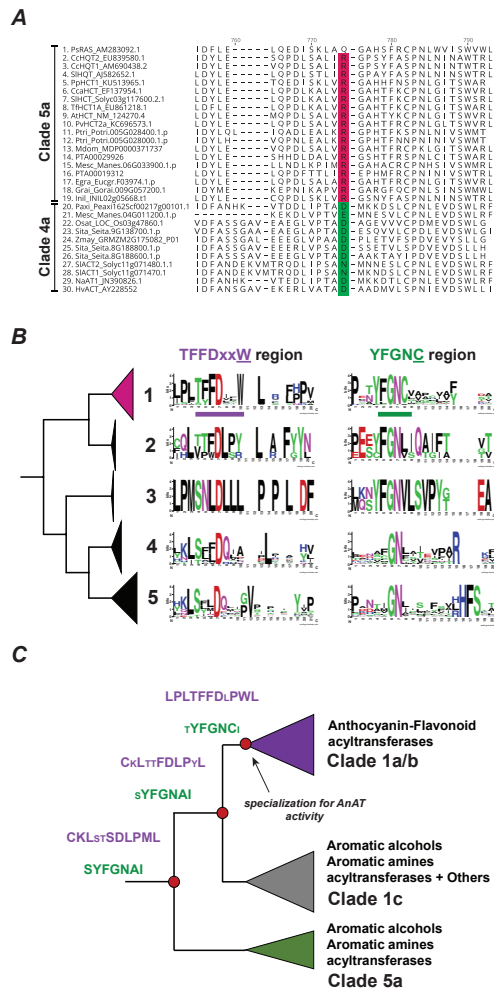

**Figure 5. Conserved residues in different clades and ancestral state reconstruction. (A)** Alignment of clade 5a and clade 4a OG sequences. Highlighted in red is the Arg residue conserved in ~90% of clade 5a BAHDs that predominantly use aromatic alcohols. In green, the corresponding Asp, Glu or Asn residues in amine acylating BAHDs are shown, of which Asp is present in ~90% of clade 4a sequences. **(B)** Conserved TFFDxxW and YFGNC motif region in different clades of the BAHD phylogeny. Groups 1-5 are defined in **Figure S4B**. A 20 amino acid broad window is shown. **(C)** Ancestral sequence reconstruction of the conserved TFFDxxW (purple) and YFGNC (green) region. Large letters are residues with a posterior probability >80%. Smaller letters represent residues with a posterior probability <80%. Additional information can be found in **File S6**.

412 Using OG comparisons, we also looked at sequence differences between  
 413 HCT/HQT-like enzymes (clade 5a/b) and AnAT-like enzymes (clades 1a/b) by  
 414 supplementing the single-residue analysis with enrichment analysis of larger motifs given  
 415 the larger structural difference between the substrates. We focused on AnAT-like  
 416 enzymes, since they are the most widespread and well-characterized clades among  
 417 plants (**Fig. 4**). The OGs of clades 1a/1b extend farthest back to angiosperms, which  
 418 suggests that the fixation of this activity occurred only in this lineage. This spread  
 419 corroborates with previous knowledge about evolution of the core anthocyanidin pathway  
 420 in seed plants (Davies et al., 2020; Piatkowski et al., 2020), which is further extended via

421 glycosylation, methylation and acylation. Anthocyanin acylation can improve the stability  
422 of the molecule to heat, higher pH, UV light, also providing an evolutionary advantage to  
423 its fixation in flowering plants.

424 Motif enrichment analysis revealed among others, two large, over-represented  
425 motifs in these clades (TFFDxxW: E-value=1.9e-248; YFGNC: E-value=4.5e-221, **Fig.**  
426 **5B, Fig. S4A**). Single-residue analysis also confirmed that two residues Trp36 and  
427 Cys320 contained in the conserved motifs, were highly conserved AnAT enzymes in  
428 comparison to other biochemically characterized BAHDs (100% vs 0% and 95% vs 4%,  
429 respectively) (**Fig. S4; Fig. S5A,B**). Both these residues were closer to the catalytic His  
430 than other identified residues in the crystallized structure of Dm3MAT3 in complex with  
431 malonyl-CoA (PDB: 2E1T) (Unno et al., 2007). Ancestral sequence reconstruction was  
432 performed to determine when these residues appeared in the BAHD phylogeny. Over  
433 80% of residues in the ancestor of all AnAT-type enzymes could not be predicted  
434 confidently (posterior probability<0.8), owing to the rapid sequence evolution of BAHDs  
435 (**File S6**); however, both Trp36 and Cys320 were confidently placed in the ancestral node  
436 of clade 1a/b (**Fig. 5C**; posterior probability>0.95). Emergence of these two residues was  
437 most likely preceded by a Tyr (<80% posterior probability) and an Ala, respectively, in the  
438 prior ancestral node (**Fig. 5C**). These results suggest that the acquisition of Trp36 and  
439 Cys320 was important for the angiosperm-restricted specialization of the ancestrally  
440 accessible AnAT activity. We next performed molecular dynamic (MD) simulations to  
441 determine the role of these residues in the AnAT activity. MD simulations were performed  
442 using the wild-type Dm3MAT3 enzyme and by replacing the two residues with Ala, a  
443 catalytically neutral residue.

444

#### 445 ***The role of Trp36 and Cys320 in anthocyanin malonyltransferase catalysis***

446 The first step of the acyltransferase reaction involves proton abstraction from the  
447 cyanidin 3-O-glucoside (C3G) 6"-hydroxyl by the deprotonated, basic nitrogen of the  
448 His170 imidazole (**Fig. 6B**) (Unno et al., 2007). For successful intermolecular proton  
449 transfer to occur, the distance between these two atoms should be less than 4 Å to  
450 account for the longest possible hydrogen forming (Harris and Mildvan, 1999).  
451 Simulations revealed that the distance for C3G 6"-hydroxyl proton abstraction fell within



452 a 4 Å threshold for WT Dm3MaT3 for the entire 1 μs of production runs. After maintaining  
453 a catalytically competent distance for the first 100 ns of simulation, the distance for proton  
454 abstraction in the C320A mutant exceeded the 4 Å threshold. The W36A mutant never  
455 achieved a distance satisfactory for catalysis to proceed (**Fig. 6A**). This result suggested  
456 that the W36A mutant would have a lower catalytic efficiency than wild-type and the  
457 C320A mutant for both C3G and malonyl-CoA.  
458

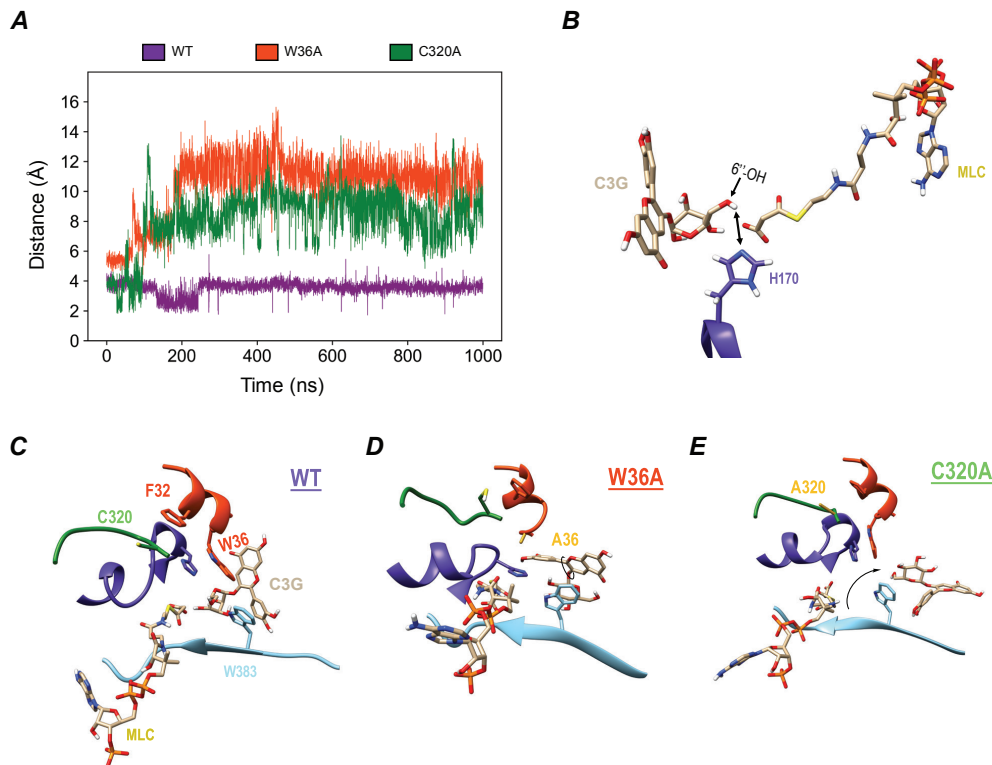

**Figure 6. Distance calculations between the cyanidin 3-O glucosides 6''-OH hydrogen and the deprotonated, basic nitrogen of the His170 imidazole. (A)** Distance calculation for WT (purple), W36A (red) and C320A (green) over 1000 ns of simulation time. **(B)** Illustration of the distance measured during the simulation. Active site organization is altered upon replacement of Trp36 and Cys320. Active site organization in the **(C)** WT protein, **(D)** the W36A variant, and **(E)** C320A variant during catalysis. Ala substitutions are colored and labeled as goldenrod in the appropriate systems.

459 We next assessed how C3G is repositioned by each of the Dm3MaT3 variants  
460 (**Fig. 6C-E**). In wild-type Dm3MaT3, the glucose moiety of C3G maintained a tight  
461 proximity to His170 within the active site, as it was flanked by bulky residues Trp36 and  
462 Trp383 (**Fig. 6C**). The benzene diol moiety of C3G stacked with Trp383 and the  
463 chromenylium moiety stacked with Trp36. Incorporation of these bulky residues in the  
464 proximal active site imposed a restriction on the movement of C3G, encouraging catalysis

465 by keeping it close to the reactive His170. Upon W36A substitution, the bulky Trp residue  
466 was no longer present, which allowed C3G to sample other conformations within a more  
467 open active site, while still remaining bound to the enzyme. Trp383 initially stacked with  
468 aromatic portions of C3G in the WT, as seen in the Dm3MaT3 WT simulation. However,  
469 in W36A, the glucose moiety of C3G was flipped from its starting pose, where backbone  
470 hydrogens on the hexose ring demonstrate C-H $\cdots$  $\pi$  interactions with Trp383, positioned  
471 the 6''-hydroxyl far from His170 (**Fig. 6D**). Thus, the W36A mutation directly altered active  
472 site organization, providing a straightforward justification for this Dm3MaT3 variant's  
473 reduced  $k_{cat}/K_m$ .

474 While the C320A mutant initially maintained a native active site organization due  
475 to the interactions between C3G and Trp36, C3G completely left and was excluded from  
476 the active site by the end of the simulation (**Fig. 6A,E**). Ala substitution altered the native  
477 C-H $\cdots$  $\pi$  interactions between the backbone of residue 320 and the aromatic portion of  
478 Phe32. In *apo* simulations, the distance between the backbone hydrogen of Ala320 and  
479 the  $\pi$  system of Phe32 was consistently less than 3 Å, but it experienced fluctuations  
480 ranging between 2.5 and 6 Å during *holo* simulations (**Fig. S7A,B**). For WT and W36A  
481 variants, these distances were constant and unperturbed by the introduction of ligand,  
482 suggesting that the basis of reduced activity in the C320A mutant is distinct from that  
483 seen in the W36A mutant (**Fig. 6D**).

484 Snapshots from simulation reveal that upon experiencing fluctuations in the  
485 distance between the backbone alpha hydrogen of Ala320 and the aromatic portion of  
486 Phe32, a series of stacking rearrangements occurred along the helix containing the  
487 TFFDxxW motif (**Fig. S6C,G**). First, Phe32 became destabilized due to inconsistent  
488 backbone C-H $\cdots$  $\pi$  interactions with Ala320, resulting in increased edge-to-face stacking  
489 between Phe31 and Phe32 (**Fig. S6A**). Alternation of face-to-face and edge-to-face  
490 stacking between Phe31 and Phe32 was seen throughout each of the *apo* and *holo*  
491 systems simulated (**Fig. S7**), but the extent of fluctuation between the two modes of  
492 stacking, and the sampling of continuous no stacking interactions, was greatest for *holo*  
493 C320A.

494 To recover stability within the C320A variant's TFFDxxW motif, Phe35 broke its  
495 edge-to-face stacking with Trp36 and began to stack with Phe31 and Phe32 (**Fig. S6D**,

496 **Fig. S7**). While the W36A substitution prevented Phe35 from edge-to-face stacking with  
497 an active site tryptophan, Phe35 never stacked with neither Phe31 nor Phe32 (**Fig. S8**).  
498 WT Dm3MaT3 also demonstrated virtually no Phe31-Phe35 nor Phe32-Phe35 stacking  
499 (**Fig. S9**), suggesting these interactions were developed in response to instabilities  
500 caused by C320A substitution. Thus, as Phe35 sampled new stacking interactions with  
501 Phe31 and Phe32, Phe35-Trp36 stacking interactions were momentarily lost (**Fig. S6D**).  
502 With the network of stacking interactions between Phe35, Trp36, and His170 disrupted,  
503 the active site lost the tight organization which is requisite for maintaining a catalytically-  
504 competent distance between His170 and the C3G 6''-hydroxyl (**Fig. S6E,F**). C3G then left  
505 the immediate vicinity of His170 and the TFFDxxW motif to bind elsewhere within the  
506 enzyme.

507 In contrast to the Ala substituted variants, wild-type Dm3MaT3 maintained an  
508 ordered active site which better maintained proximity to C3G and overall acyltransferase  
509 activity (**Fig. 6C**). The stability and organization of the wild-type enzyme is underscored  
510 by consistent Phe31-Phe32 face-to-face stacking and Phe35-Trp36 edge-to-face  
511 stacking, neither of which were disrupted by Phe31-Phe35 or Phe32-Phe35 stacking at  
512 any point during the *holo* wild-type simulation (**Fig. S9**).

513 The MD simulation results thus suggested that that the W36A variant would have  
514 inferior reaction kinetics in comparison to the wildtype due to absence of the bulky Trp36  
515 that is important for keeping the C3G proximal to His170. Furthermore, we were  
516 interested in examining how severely the C320A variant activity would be affected,  
517 because the MD simulations demonstrated that C320A may position the acyl acceptor in  
518 a catalytically competent position, suggesting the possibility for some functionality despite  
519 mutation. In addition, for ~10% of the total simulation time (about 100 ns), the C320A  
520 mutant maintained C3G 6''-hydroxyl and the His170 imidazole within a distance of 4 Å  
521 (**Fig. 6A**). Therefore, we tested the effects of Ala replacement of Trp36 and Cys320 using  
522 site specific mutagenesis and subsequent *in vivo* enzyme assays.

523

524 ***The catalytic importance of the two residues in anthocyanin acyltransferase***  
525 ***activity***

526 We heterologously expressed and purified mutagenized Dm3MAT3 variants from  
 527 *E. coli*. These proteins showed similar folding behavior based on similar gel migration and  
 528 retention time in size-exclusion chromatography compared to the wild-type protein (**Fig.**  
 529 **S11A,B**), suggesting that the mutation did not affect protein folding; however, both  
 530 mutants substantially affected enzyme reaction kinetics when comparing specific  
 531 activities (**Fig. 7A,B,C**). Comparing the pseudo-first-order reaction kinetics of the wild-  
 532 type Dm3MAT3 enzyme with the W36A mutant revealed that the mutation did not  
 533 influence the acceptor  $K_m$  value (**Fig. 7D**) but drastically reduced turnover number ( $k_{cat}$ )  
 534 and catalytic rate ( $k_{cat}/K_m$ ) by ~97% and 97.5%, respectively (**Fig. 7E,F**). All three kinetic  
 535 estimates were significantly reduced for the acyl donor malonyl-CoA (**Fig. 7D-F**).

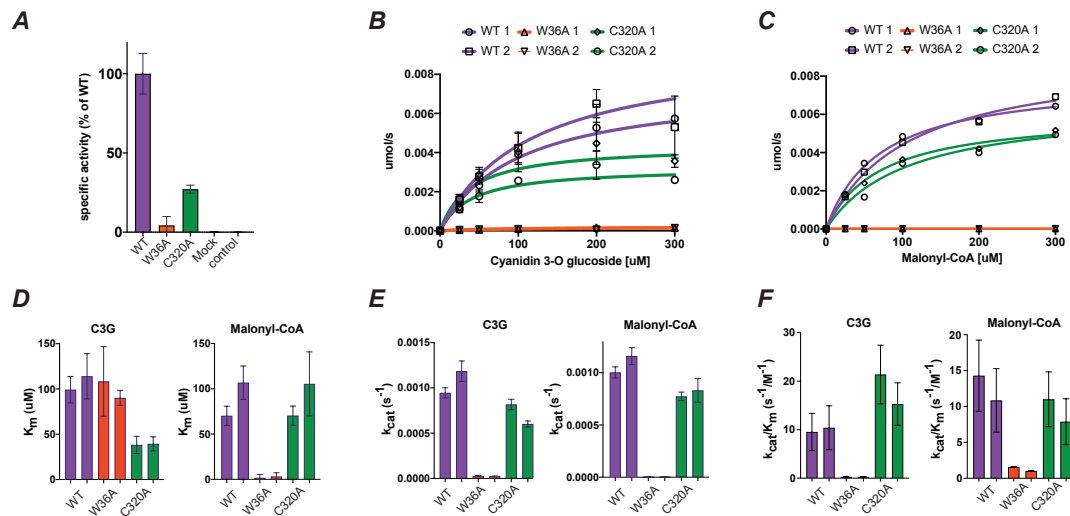

**Figure 7. Enzyme activity and enzyme kinetics of Dm3MAT3 wildtype and mutants.** (A) Specific activity of Dm3MAT3 wild-type, W36A and C320A mutant. The activity of the wild-type (WT) is set to 100 %. The error bar represents the standard deviation of three expression replicates which were each assayed in technical triplicates. (B) Michaelis-Menten curve for Dm3MAT3 WT (WT), Dm3MAT3 W36A (W36A), and Dm3MAT3 C320A (C320A) in dependence of cyanidin 3-O glucoside (C3G). (C) Michaelis-Menten curve for the malonyl-CoA donor. (D)  $K_m$  values of WT, W36A and C320. (E)  $k_{cat}$  values. (F)  $k_{cat}/K_m$  values.

536 These changes in enzyme activity suggest that Trp36 is catalytically important for  
 537 the AnAT activity in clades 1a/b. The relatively similar acceptor  $K_m$  between wild-type and  
 538 W36A mutant suggested that the mutation did not affect acceptor substrate binding. Thus,  
 539 while the MD simulations suggested a quick C3G departure from the active site, the  
 540 molecule may still remain in the binding cavity due to interactions with other residues, and  
 541 exit normally. The kinetic assays – specifically the reduced  $k_{cat}$  and  $k_{cat}/K_m$  values for both

542 acceptor and donor – support MD simulation predictions that catalysis would be  
543 drastically affected due to C3G departure from a catalytically competent distance with  
544 His170. The  $K_m$  of the W36A mutant towards malonyl-CoA was also significantly reduced.  
545 Considering AnAT-like acyltransferases are postulated to operate through a two-  
546 substrate ordered bi-bi reaction mechanism with malonyl-CoA binding first (Suzuki et al.,  
547 2003; Unno et al., 2007), we hypothesize that the reduced catalysis in W36A results in  
548 the malonyl-CoA continually bound to the donor binding site, further resulting in a  
549 saturation of the available donor sites at lower substrate concentration.

550 In the case of the C320A mutant, the observed effects were less severe than for  
551 the W36A mutant (**Fig. 7A**), and the C320A still exhibited a  $k_{cat}$  ~47-74% of the WT (**Fig.**  
552 **7E**). Compared to the wild-type, the C320A mutant showed an improved  $K_m$  towards C3G  
553 (**Fig. 7D**). This lower  $K_m$  and the only slightly reduced  $k_{cat}$  resulted in a 50% improved  
554 catalytic rate than WT (**Fig. 7F**). The C320A mutant showed an unchanged  $K_m$  and a  
555 lower  $k_{cat}$  for malonyl-CoA. This resulted in a slightly less efficient enzyme with respect to  
556 the donor (**Fig. 7F**).

557 These results support the simulation prediction that Cys320 plays a role in  
558 optimizing the enzyme's activity rather than catalysis. While MD simulations indicated that  
559 stability of the C3G bound form is reduced, this results in only a slightly decreased  $k_{cat}$ .  
560 However, we postulate that the acceptor substrate remains in the substrate binding site  
561 without catalysis, reducing the  $K_m$  to a greater extent than reduction in  $k_{cat}$ , thereby  
562 mathematically increasing the catalytic efficiency. Combined together, these results  
563 suggested that the presence of both Trp36 and Cys320 is necessary for optimal  
564 anthocyanin malonyltransferase activity in clades 1a/b, explaining their conservation in  
565 AnATs spread out over 150 million years of angiosperm evolution.

566

## 567 **DISCUSSION**

568 Evolution of functional diversity in large enzyme families that contribute to the  
569 metabolic diversity in plants is still incompletely understood. In this study, we extensively  
570 characterized the BAHD family to determine how gene duplication and promiscuity  
571 contributed to the diversity of BAHD functions. Nine out of eleven BAHDs assayed in this

572 study were substrate-promiscuous (**Fig. 2; Fig. S2; File S2**), and three (MeHFT, SIHCT,  
573 EcCS) were class-promiscuous under the testing conditions (**Fig. 2A, Fig. 1**). We only  
574 tested nine substrate types (including glucose/sucrose), and the specialized enzymes  
575 may still exhibit class-promiscuity with other, untested classes under different conditions.  
576 More enzymes that cross class boundaries are known from previous studies (**Fig. 4**).  
577 Nonetheless, these observations suggest that while most BAHs are not able to  
578 discriminate between structurally related compounds (e.g. shikimate, quinate for SIHCT  
579 or putrescine, agmatine for SIACT), they are able to differentiate between very different  
580 chemical scaffolds. For individual enzymes, these adaptations for specialization may  
581 constrain them and their duplicates from traversing large distances in the phytochemical  
582 space. On the other hand, the class-promiscuity of multiple enzymes such as SIHCT,  
583 AtHCT, SmHCT1, MeHFT, EcCS, alcohol acyltransferases provides a foundation on  
584 which duplicates may traverse larger distances in the phytochemical space and “plug into”  
585 emerging metabolic pathways. Since such class-promiscuity is not typically assayed, it  
586 may be much more prevalent than currently known and may form an important basis for  
587 metabolic diversification. Significant presence of class-promiscuity can also confound  
588 evolutionary inferences and thus, functional annotation for enzyme family members.  
589 Thus, more studies to determine if there are any rules for class-promiscuity are needed.  
590 Such studies may also reveal new insights about the nature of selection on protein  
591 structural features that enable promiscuity.

592 The integrative analysis of the AnAT activity can be interpreted following the  
593 previously proposed potentiation-actualization-refinement model of emergence of new  
594 functions (Blount et al., 2008). Our results suggest that the ability to acylate anthocyanins  
595 was already actualized (first appeared/already existed) in ancestral BAHs prior to land  
596 plant evolution, or that the ancestral enzymes were potentiated to evolve the AnAT activity  
597 through different routes. The refinement of the AnAT activity in clades 1a/b required  
598 fixation of two residues, one of which (Trp36) is critical for positioning anthocyanins in the  
599 active site and the second (Cys320) for positioning the first residue. Both these residues  
600 together optimize the AnAT activity by affecting acceptor binding, however, they are likely  
601 not sufficient to confer the AnAT activity. The median clade 1a/b AnAT identity is itself  
602 ~50%, hence identifying all residues necessary to transform a class A/B utilizing enzyme



603 to class D substrate utilizing enzyme is challenging. Comparative sequence and structural  
604 analysis can help further identify regions in the protein that could be tested by  
605 mutagenesis.

606 An important question we asked was whether the structural diversity of substrates  
607 used across BAHDs is related to an ancestral ability to use these substrates or  
608 emergence of new activities through multiple rounds of duplication-neo-functionalization.  
609 Our results can be discussed in the context of two models of BAHD evolution (**Fig. 8**). In  
610 both models, the most likely ancestral activity in the root node prior to BAHD expansion  
611 is aromatic alcohol acylation. Based on the fact that many HCT/HQT enzymes also  
612 acylate aromatic amines (**Fig. 4**), class A substrates as a whole are the likely ancestral  
613 BAHD substrate space (**Fig. 8A,B**). For other activities, strong evidence for their  
614 existence exists only in the ancestor of all land plants. For example, in our enzyme assays  
615 (**Fig. 2A**) or the accumulated database (**Fig. 4**), we do not see any enzyme from any  
616 *orange/yellow* (extending to LCA of dicot-liverwort and dicot-mosses, respectively) clades  
617 acylating both aliphatic and aromatic alcohols, but these activities are seen together in  
618 seed plant clades 1c, 3a, 6a, 5b, 7c/d. Also, many aliphatic alcohol acyltransferases can  
619 also acylate monoterpenoids. Thus, while it is possible that the 1-5 root node BAHDs  
620 acylated aliphatic alcohols and thus, monoterpenoids, we cannot be certain about this  
621 inference. Finally, the presence of anthocyanin acylation is seen in MeHFT, SIHCT and  
622 multiple distantly related clades in the BAHD phylogeny (**Fig. 4**). While this could  
623 represent multiple instances of convergent evolution, a simpler explanation is existence  
624 of this activity at least among the dozen-odd BAHDs in the land plant ancestor as a  
625 promiscuous activity. No evidence exists for the assignment of this activity to the root  
626 node, but given presence of class-promiscuous enzymes, this possibility cannot be  
627 completely ruled out (**Fig. 8B**). These inferences reveal that most of the currently known  
628 BAHD acyltransferase substrate space was already accessible by the time BAHDs  
629 started drastically expanding, either as fixed or unfixed, promiscuous activities. Compared  
630 to simpler prior models of individual enzyme evolution such as the “patchwork model”  
631 (Jensen, 1976; Matsumura and Ellington, 2001) and the “specialization-generalization-  
632 specialization” model (Aharoni et al., 2005), our study of enzyme family reveals a complex  
633 picture where ancestral promiscuity played a central role in incorporation of member

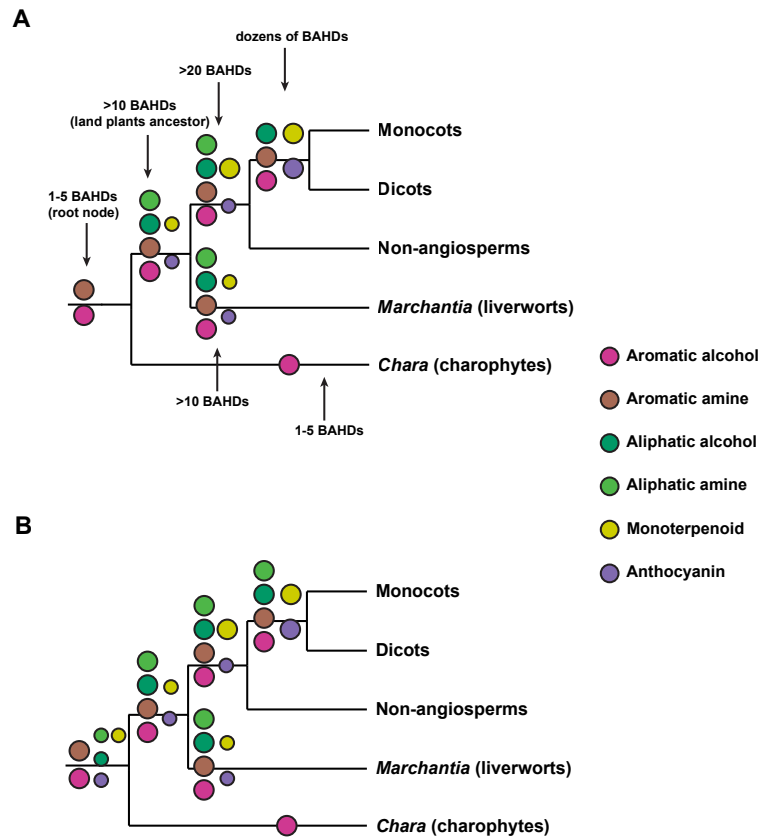

**Figure 8. Two models of evolution of BAHD multi-functionality. (A)** Conservative model: Only aromatic alcohols and amines are acylated in the root node. First steps of expansion in the branch towards the land plants ancestor leads to emergence of new activities that are fixed in the ancestor (big circles) as well as other promiscuous activities that remain unfixed (smaller circles) **(B)** Relaxed model: The 1-5 BAHDs in the LCA of charophytes and land plants are capable of utilizing most of the substrates in the current known substrate space. Specializations evolve in lineage-specific duplications. The aliphatic alcohol acyltransferase enzyme is likely a different one than the aromatic acyltransferase enzyme in the root node ancestor. The first detected monoterpenoid activities appear in the green angiosperm-gymnosperm ancestral clade (**Fig. 4**), however, strong secondary activities were also detected in MeHFT and SIHCT.

634 enzymes into new pathways. Both of these models likely apply to evolution of individual  
 635 BAHD enzymes.

636 Our inferences are based on ~140 BAHDs, and activities of many BAHDs are  
 637 unknown. For example, to the best of our knowledge in tomato, only 10 out of 100 BAHDs  
 638 have an experimentally determined function (**Table S2**) (Niggeweg et al., 2004; Goulet et  
 639 al., 2015; Fan et al., 2016) (including this study), and >80% of BAHDs have a generic  
 640 domain annotation. It is possible that uncharacterized BAHDs may reveal new primary  
 641 activities *in vitro* and *in vivo*. However, our meta-analysis suggests that – despite the



642 dangers of class-promiscuity – some clade relationships (**Fig. 4**) can provide a strong  
643 functional signal. Combined with other enzyme attributes, these clade relationships can  
644 be useful in predicting putative BAHD substrate class utilizations with greater accuracy  
645 than simply a similarity-based approach. e.g. using machine learning (Mahood et al.,  
646 2020). At the same time, among the 42 multi-species OGs not represented among  
647 characterized BAHDs, many show broad conservation across angiosperms and vascular  
648 plants. These uncharacterized OGs may indeed reveal novel BAHD activities. As new  
649 substrate classes are identified, it would be informative to test – using methods similar to  
650 those employed in this study – whether the ability to use those classes also exists across  
651 the BAHD family.

652 Findings from this study also provide insights into the role of enzyme families in  
653 metabolic diversification in plants. BAHDs are fast-evolving enzymes; even in the well-  
654 conserved clade 5a, where all known enzymes are associated with substrates related to  
655 lignin biosynthesis (**Fig. 4**), the median percent identity is only ~60%. The ability to use  
656 aromatic alcohols such as shikimate and quinate exists in BAHDs that are only 30-40%  
657 identical to the clade 5a BAHDs. In other words, these enzymes are robust in retaining  
658 their aromatic alcohol acyltransferase activity despite changes to ~70% of their sequence.  
659 Similar behavior is observed for acylsugar acyltransferases (Moghe et al., 2017) and  
660 aliphatic alcohol acyltransferases (**Fig. 4**). While being robust, the class-promiscuity of  
661 BAHDs and thus, the ability to specialize in one of the classes via duplication, would also  
662 make them evolvable. The paradox of a biological system being both robust and  
663 evolvable at the same time has previously been addressed in detail (Wagner, 2005, 2008;  
664 Bloom et al., 2006; Pigliucci, 2008; Tokuriki and Tawfik, 2009; Payne and Wagner, 2019);  
665 these properties may enable enzyme families to become involved in newly emerging  
666 metabolic pathways or detoxify harmful metabolites without compromising their core  
667 activities. The examples of aromatic alcohol, anthocyanin and terpenoid acylating  
668 enzymes – whose OGs have a much narrower phylogenetic spread than the predicted  
669 spread of the biochemical activity – also highlight a common theme in metabolism, where  
670 enzyme activities may exist promiscuously for millions of years prior to the actual  
671 genome-level signatures of their fixation. While presence of substrate promiscuity is  
672 helpful in this regard, having class-promiscuous enzymes may also offer an added

673 benefit. Presence of robust evolvable enzymes is likely an important feature of metabolic  
674 networks and needs to be studied in greater detail in the context of biochemical evolution.

675 The present study describes an integrative analysis of enzyme evolution,  
676 biochemistry and structure-function relationships that captures potentially emergent  
677 behaviors of enzyme families in the form of robustness and evolvability. The described  
678 analysis can serve as a template for characterizing class-promiscuity in enzyme families,  
679 although more high-throughput means of analysis are needed. Our results also identify  
680 patterns in duplication-divergence of BAHDs that can be explored in other large enzyme  
681 families to determine their involvement in metabolic diversification in plants.

682

## 683 **MATERIALS AND METHODS**

### 684 ***Creation of a database of biochemically characterized enzyme activities***

685 Biochemically characterized BAHD enzymes were gathered through an extensive  
686 literature search. Only sequences belonging to the BAHD acyltransferase protein fold  
687 (PFAM domain: PF02458) were considered. To ensure a high level of confidence for *in*  
688 *vitro* activities and the resulting substrate-enzyme pairs, only enzymes that were subject  
689 to *in vitro* biochemical assays were considered. For each enzyme, all tested acceptor and  
690 donor substrates with their associated PubChem CID, the associated chemical structure,  
691 cDNA and protein sequence as well as the species name from which the gene was  
692 isolated were compiled (**File S2**).

693

### 694 ***Generation of substrate similarity networks***

695 Structures of known BAHD substrates were downloaded from the PubChem  
696 database using the PubChem ID as structure-data file (sdf) format. Substrates not found  
697 in the PubChem database were created using ChemDraw, exported in the MOL data  
698 format and manually brought into sdf format. To calculate substrate similarity based on  
699 the maximum common substructure, overlap coefficient (MCS-Overlap), the R packages  
700 ChemmineR v3.34.1 and fmcsR v1.24.0 were used (Cao et al., 2008; Wang et al., 2013)  
701 with default values, except for the time threshold for the comparison of two molecules set

702 to 12s. The similarity network was visualized using Cytoscape v3.8.0 (Shannon et al.,  
703 2003). Additional plant specific compounds were downloaded from the Chemical Entities  
704 of Biological Interest (ChEBI) database (Hastings et al., 2013) and only compounds were  
705 chosen that were also represented in the plant-centric KNApSack database (Afendi et  
706 al., 2012),

707

### 708 ***Identification of BAHD acyltransferases and OG assignment***

709 For identification of BAHD acyltransferases from the analyzed genomes, we used  
710 hmmsearch v3.1b2 (Potter et al., 2018) using the BAHD PFAM domain (PF02458) with  
711 all default parameters except *cut\_ga* as the hit significance threshold. OGs were  
712 constructed using OrthoFinder v2.3.3 (Emms and Kelly, 2019) with default parameters  
713 except an inflation parameter of 1.5 to make larger OGs. After defining OGs between  
714 these species, we used blastp (Camacho et al., 2009) to assign biochemically  
715 characterized enzymes to OGs. For each enzyme, its individual phylogenetic  
716 conservation was determined based on the phylogenetic spread of its assigned OG (**File**  
717 **S4**). An internal node in the species tree was assigned an activity if multiple characterized  
718 enzymes shared their conservation up to that node.

719

### 720 ***Creating a time-calibrated species phylogeny for ancestral state reconstruction***

721 While recent attempts to infer a well-sampled land plant phylogeny (Gitzendanner  
722 et al. 2018) and estimate divergence times (Nie et al. 2019) of green plants exist, a time  
723 calibrated phylogeny encompassing the breadth of taxa included in our dataset does not.  
724 In order to obtain one, we first obtained a time calibrated phylogeny from TimeTree, a  
725 database of synthesized time calibrated studies (Kumar et al. 2017). Because not all taxa  
726 were present in TimeTree we used 'proxy taxa' (closest relative represented in TimeTree)  
727 to assign a position within the phylogenetic tree. (**File S7A**). Using this approach, we  
728 accounted for all taxa in our database with the exception of *Klebsormidium nitens*  
729 (charophytic algae), which was manually added to the most likely position according to  
730 (Leliaert et al., 2012). To obtain divergence time for this group, we recalibrated the  
731 phylogeny using a penalized likelihood under a relaxed clock model (Sanderson, 2002),

732 a  $\lambda=0$  and 95% CI intervals for major clades, inferred from previous studies  
733 (Magallón et al., 2015; Nie et al., 2020) (**File S7B**), with the function `chronos()` in R  
734 package `ape` v.5.4 (Sanderson, 2002; Paradis and Schliep, 2019).

735

### 736 ***BAHD family size evolution***

737 In order to determine the expansion dynamics of the BAHD gene family, we  
738 modeled the evolution of normalized BAHD gene counts. Counts were normalized against  
739 predicted total number of coding sequences in each genome with a methionine start  
740 residue that were longer than 100bp. If >30% of the gene models did not fit these criteria,  
741 these genomes (9 gymnosperm, 2 red algae) were eliminated from further analyses. We  
742 fitted normalized counts and our phylogeny using Evolutionary Brownian Motion (BM) and  
743 Bounded Brownian Motion (BBM) type models and performed model selection using the  
744 R package `BBMV` v2.1 with default parameters except those specified below (Boucher et  
745 al. 2016). BBM is a special case of Brownian motion (BM) where values are constrained  
746 between a minimum and a maximum value (Boucher et al. 2016). We used a minimum  
747 bound of 0, as negative gene copy is biologically nonsensical, and a maximum bound of  
748 0.02914. It was suggested that the maximum bound should be set to the largest value in  
749 the dataset (in our data set *Petunia axillaris*: 0.00679) (Boucher et al. 2016). However,  
750 this value is value may not realistically represent the upper bound of the gene count for  
751 an existing gene family. Therefore, we used *Arabidopsis thaliana*, the best annotated  
752 plant genome, to identify the largest gene family present, which was the EAR repressome  
753 family with 403 members (<https://www.arabidopsis.org/browse/genefamily/index.jsp>;  
754 accessed August 20, 2020). We normalized this value against the total number of gene  
755 in the *Arabidopsis* genome (<https://www.arabidopsis.org/browse/genefamily/index.jsp>;  
756 accessed August 20, 2020) and set the upper bound of the model at 2x the normalized  
757 gene number in this family (upper normalized limit = 0.02914). We acknowledge the  
758 potential existence of gene families in nature that are larger but assume that this limit  
759 should properly account for a majority of potential gene families.

760

### 761 ***Plant material, RNA extraction and cDNA synthesis***

762 Plant material from the cultivated tomato variety M82 was used for cloning tomato  
763 BAHDs. Plants were grown in a growth chamber under constant light/dark (16 h/8 h)  
764 regime at 24 °C for 8 weeks until first flowers appeared. For RNA extraction, young leaves  
765 were cut from a single plant using clean tweezers and scalpel, immediately flash frozen  
766 using liquid nitrogen (liq. N<sub>2</sub>) and stored at -80 °C until further use. Total RNA was  
767 extracted using the E.Z.N.A Plant RNA Kit (Omega Bio-tek, Norcross, GA) as per  
768 manufacturers protocol with on-column DNase digestion. cDNA was synthesized using  
769 the Protoscript II Reverse Transcriptase (New England Biolabs, Ipswich, MA [NEB]) with  
770 Oligo-dT<sub>17</sub> primer (**Table S3**) at 45 °C for one hour. After heat inactivation for 20 minutes  
771 at 80 °C, the reaction mix was diluted with four volumes of nuclease-free water and stored  
772 at -20 °C until further use.

773

#### 774 ***Amplification of candidate enzymes, cloning of expression constructs, and site-*** 775 ***specific mutagenesis***

776 For amplifying cDNA sequences of candidate BAHD enzymes for cloning, the Q5  
777 Hot Start High Fidelity DNA Polymerase (NEB) with gene specific primers was used  
778 (**Table S3**). To allow fast and easy cloning using the Gibson assembly, the primers  
779 contained matching overlaps to the pET28b vector, with successful insertion resulting in  
780 N-terminal fusion of the candidate enzyme with a 6x His tag. After successful  
781 amplification, the PCR product was purified using the E.Z.N.A Cycle Pure Kit (Omega  
782 Bio-tek, Norcross, GA) and eluted in 30 µl nuclease-free water. First, the pET28b vector  
783 was linearized using BamHI and XhoI restriction enzymes (NEB) and purified using the  
784 E.Z.N.A Cycle Pure Kit. Second, 50 ng of linearized vector was mixed with 100 ng of  
785 purified PCR product and incubated with HiFi DNA Assembly Master Mix (NEB) according  
786 the manufacturers protocol. After assembly, 3 µl of the reaction mix were used for  
787 transformation of *E. coli* 10-beta (NEB) cells. The transformation mix was plated on Luria-  
788 Bertani (LB) medium containing kanamycin (50 µg/ml) and streptomycin (50 µg/ml).  
789 Grown colonies were screened using colony PCR with construct-specific primers. Positive  
790 clones were confirmed using Sanger sequencing at the Cornell Institute of Biotechnology.  
791 In case of Dm3MAT3, the full-length gene was codon-optimized, synthesized and cloned

792 into pET28b by Gene Universal (Newark, DE). For cloning the *C. braunii* BAHD, the *C.*  
793 *braunii* genome sequence (Nishiyama et al., 2018) was used. Previous studies postulated  
794 presence of a BAHD orthologous to HCT potentially involved in a progenitor of lignin  
795 biosynthesis (de Vries et al., 2017; Renault et al., 2019) however, no experimentally  
796 characterized functions are available. We chose two out of four *C. braunii* BAHD enzymes  
797 (PFAM: PF02458) that contained an intact catalytic HxxxD motif. The gene was  
798 synthesized in two overlapping (42 bp overlap) parts (gBLOCKS) (Integrated DNA  
799 Technologies, Coralville, IA [IDT]) and assembled into the pET28b vector as described  
800 above. All constructs were sequenced before transformation into *E. coli* Rosetta2 cells  
801 (EMD-Millipore-Sigma, Burlington, MA) for heterologous expression. Site-specific  
802 mutagenesis of Dm3MAT3 was conducted using the Q5 site-directed mutagenesis kit  
803 (NEB) (**Table S3**).

804

### 805 ***Heterologous expression and protein purification***

806 Protein expression was induced in mid-log phase growing *E. coli* cells containing  
807 the respective expression construct after addition of 0.5 mM isopropyl- $\beta$ -D-  
808 thiogalactopyranoside (IPTG). The cultures (300 ml) were incubated for 16 hours at 25°C  
809 in LB medium supplemented with 50  $\mu$ g/ml kanamycin and 50  $\mu$ g/ml chloramphenicol  
810 while shaking at 250 rpm. For protein extraction, the overnight grown cells were pelleted  
811 by centrifugation for 15 minutes at 5000g and re-suspended in lysis buffer (50 mM  
812 NaH<sub>2</sub>PO<sub>4</sub>, 300 mM NaCl, 10 mM imidazole, pH 8.0), to which lysozyme was added  
813 (~1 mg/ml) and incubated for 1 hour at 4°C. Subsequent sonification (intensity 90%,  
814 Lawson Scientific, Harrogate, United Kingdom) for 10 minutes was conducted to shear  
815 remaining intact cells. After centrifugation for 30 min at 21,000 g to remove cell debris  
816 and insoluble proteins the cell-free lysate was incubated with Ni-NTA-Agarose matrix  
817 (Qiagen, Germantown, MD [Qiagen]) for 30 min. After removing the lysate, the matrix was  
818 washed with 10 column volumes (cv) wash buffer (50 mM NaH<sub>2</sub>PO<sub>4</sub>, 300 mM NaCl,  
819 20 mM imidazole, pH 8.0) and then added to a 2 ml spin column (BioRad, Hercules, CA)  
820 equipped with a frit. The matrix was washed again with 5 cv wash buffer after which  
821 proteins were eluted three to four times using one cv elution buffer (50 mM NaH<sub>2</sub>PO<sub>4</sub>,  
822 50 mM NaCl, 250 mM imidazole, pH 8.0). Fractions with similar protein content were



823 combined and the protein concentration was determined in triplicate using the Bradford  
824 method (Bradford, 1976).

825

### 826 ***Size exclusion chromatography***

827 Protein was expressed from *E. coli* BL21 grown at 37°C with 50 µg/mL kanamycin  
828 to select for desired cells. When  $A_{600}$  values reached approximately 0.4, cells were  
829 induced with 0.1 M IPTG, cooled to 15°C, and incubated with shaking for 18 hours. Cells  
830 were then pelleted with centrifugation, supernatant discarded, and cell pellets frozen at -  
831 80°C until ready for next steps. Cell pellets were thawed on ice, then resuspended in lysis  
832 buffer (50 mM tris pH 8, 20 mM imidazole, 500 mM NaCl, 10% glycerol, 1% Tween-20),  
833 and lysed by sonication. Lysate was centrifuged to pellet debris, and the supernatant was  
834 passed through 2 mL of Ni-NTA resin. Resin was washed with buffer (50 mM Tris pH 8,  
835 20 mM imidazole, 500 mM NaCl, 10% glycerol), then protein eluted in a single fraction  
836 (50 mM Tris pH 8, 250 mM imidazole, 500 mM NaCl, 10% glycerol). To the fraction  
837 containing desired protein, 30 U of thrombin was added, the entire solution was  
838 transferred to dialysis tubing, and dialyzed overnight in 1 L of wash buffer. The resulting  
839 solution was removed from dialysis tubing and passed through a column containing 300  
840 µL Ni-NTA resin and 200 µL Benzamidine-sepharose resin. The flowthrough was  
841 collected and further purified by FPLC size-exclusion chromatography (Hi-Load 26/600  
842 S-200 column, buffer contained 100 mM NaCl, 25 mM HEPES, pH 7.5).

843

### 844 ***Biochemical synthesis of p-coumaroyl-CoA and feruloyl-CoA***

845 For enzyme assays using p-coumaroyl-CoA and feruloyl-CoA as acyl donor, the  
846 donor was synthesized biochemically using 4-coumaroyl-CoA ligase (4CL) from tomato  
847 as described previously (Beuerle and Pichersky, 2002). The cDNA of tomato 4CL was  
848 amplified using gene specific primers (**Table S3**), cloned into pET28b, heterologously  
849 expressed, and purified as described above. To generate the CoAs, 5 mM MgCl<sub>2</sub>, 2 mM  
850 ATP, 2 mM p-coumaric acid (TCI America, Portland, OR) or ferulic acid (MP Biomedicals,  
851 Solon, OH), and 3 mM coenzyme A (MP Biomedicals) in 50 mM sodium phosphate buffer  
852 (pH 8.0) were incubated for 24 hours at room temperature (Beuerle and Pichersky, 2002).  
853 The reaction was stopped by heating the reaction mix to 70 °C for 20 min. After

854 centrifugation at 21,000 g for 30 min to remove precipitated protein the supernatant was  
855 transferred into a new reaction tube and stored at -20 °C until further use. The final  
856 concentration of activated donor was estimated to be 1.6 mM based on the initial  
857 substrate concentrations and an assumed conversion rate of 80% (Beuerle and  
858 Pichersky, 2002).

859

## 860 **Enzyme assays**

861 In general, enzyme assays used for screening the substrate promiscuity of  
862 selected BAHD enzymes were performed in 50 µl reactions containing 50 mM sodium  
863 phosphate buffer (pH 7.2), supplemented with 100 µM acceptor substrate, and 300 µM  
864 donor substrate. The assay was started by the addition of 20 µg purified enzyme.  
865 Preliminary enzyme assays with lower substrate concentrations did not show any  
866 indications for substrate inhibition at such substrate concentrations. For each enzyme,  
867 three replicates per substrate were performed and incubated for 1 hour. Reactions were  
868 stopped by adding 100 µl of a mixture of isopropanol, acetonitrile, and water (ratio of 2:2:1  
869 + 0.1% (v/v) formic acid) containing 15 µM of the internal standard telmisartan. The  
870 reaction mix was centrifuged for 10 min at 21,000 g to remove precipitated proteins,  
871 transferred into LC vials, and stored at -20 °C until LC-MS analysis. Mock controls using  
872 purified protein extracts from empty vector transformed *E. coli* were run to exclude *E. coli*  
873 background activity, for each of the used acceptor and donor combinations.

874 To test whether SIACT, CbHCT, and MeHFT can use additional substrates from  
875 the aromatic alcohol, aliphatic and aromatic amine class not captured using 100 µM of  
876 substrate, a modified version with higher substrate concentrations were used (assay  
877 version 2). A 50 µl reaction containing 50 mM sodium phosphate buffer (pH 7.2), 1 mM  
878 acceptor substrate, 300 µM coumaroyl-CoA was started using 20 µg of the respective  
879 enzyme, incubated for 1 hour, stopped, and subsequently run on LC-MS as described  
880 above.

881 Enzyme assay reactions for screening for enzyme activities were measured  
882 individually on the LC-MS and each product was detected with specific PRM parameters  
883 (see below). In order to determine more detailed enzyme kinetics for anthocyanin  
884 acylating enzymes, a modified version of the above described enzyme assays was used



885 (assay version 3). Varied concentrations of cyanidin-3-O-glucoside (25, 50, 100, 200,  
886 300  $\mu$ M) and malonyl-CoA (25, 50, 100, 200, 300  $\mu$ M) were used to determine enzyme  
887 kinetics. The counter substrate was kept at a saturating concentration of 300  $\mu$ M. Two  
888 biological replicates (independent enzyme expression and purification) were used and  
889  $K_m$ ,  $K_{cat}$  and  $V_{max}$  were determined using non-linear curve fitting in Prism 8 (GraphPad,  
890 San Diego, CA). All enzyme reactions were measured under initial rate conditions and  
891 stopped as described above. The wildtype enzyme reactions were incubated for 10  
892 minutes and mutant reactions for 20 and 30 minutes for C320A and W36A variants,  
893 respectively.

894

### 895 ***LC-MS measurements***

896 LC-MS analysis was performed on a ThermoScientific Dionex Ultimate 3000 HPLC  
897 equipped with an autosampler coupled to a ThermoScientific Q-Exactive HF Orbitrap  
898 mass spectrometer using solvent A (water + formic acid (0.1% v/v)) and solvent B  
899 (acetonitrile + formic acid (0.1%)) at a flow rate of 0.6 ml/min. Products of enzyme  
900 reactions were detected with specific PRM methods using their predicted parent ion mass  
901 in positive or negative ionization mode with an isolation window of 2 m/z (**Table S4**).  
902 Additional details of chromatographic and mass spectrometric methods are described in  
903 **Table S4 and S5**. LC-MS data was analyzed with the ThermoScientific Dionex  
904 Chromeleon 7 Chromatography Data System v7.2 software. Peaks were selected using  
905 their specific masses (**Table S4**) and default peak detection parameters.

906

### 907 ***Phylogenetic analysis***

908 Protein sequence alignment was generated using MAFFT v.7.453-with-extensions  
909 (Kato et al., 2002) using following parameters: *--maxiterate 1000 --genafpair --thread*  
910 *70*. The alignment was inspected manually to ensure proper alignment e.g. by inspecting  
911 that known motifs like the HxxxD and DFGWG motif are aligned properly. Afterwards, IQ-  
912 Tree v.1.6.10 (Nguyen et al., 2015) was used to infer a phylogenetic tree using following  
913 parameters: *-st AA -nt AUTO -ntmax 70 -b 1000 -m TEST* after model selection

914 (LG+F+G4) using ModelFinder (Kalyaanamoorthy et al., 2017). Tree visualization was  
915 created using iTol v.5.6.2 (Letunic and Bork, 2019).

916

### 917 ***Identification of enriched motifs in anthocyanin acylating enzyme***

918 For identifying enriched motifs in a specific clade of anthocyanin acylating  
919 enzymes, we used MEME v.5.0.5 (Bailey et al., 2009) in discriminative mode using default  
920 parameters but the maximum number of motifs to find set to 5. Positive and negative  
921 examples were set as described in **Fig. S5**. The TFFDxxW and YFGNC sub-motifs were  
922 selected for further analysis due to their high degree of conservation and their proximity  
923 to the active site within the Dm3MAT3 protein. Clade-wise single residues were identified  
924 using custom Python scripts.

925

### 926 ***Prediction of ancestral sequence of AnATs***

927 Ancestral sequence reconstruction was performed using IQ-TREE v1.6.10  
928 (Nguyen et al., 2015). Twenty randomly selected sequences from each of the three  
929 orthologous groups representing clades 1a-c and 5a (outgroup) were combined together  
930 with previously characterized BAHDs from these clades. All protein sequences were  
931 aligned using MAFFT v7.453 and provided as input to IQ-TREE, which was run with  
932 model selection and ancestral state reconstruction with 1000 standard bootstraps. The  
933 optimal tree was obtained using the JTT+I+G4 model. Per-site posterior probabilities of  
934 the ancestral state prediction were filtered using a threshold of 0.95, and the resultant  
935 FASTA sequence at each ancestral node was extracted using a custom Python script.

936

### 937 ***Preparation of PDB structures for docking and molecular simulations***

938 The *holo* structure of Dm3MaT3 bound to malonyl-CoA (MLC), the acyl-donor, was  
939 retrieved from the Protein Data Bank (PDB: 2E1T) (Berman et al., 2000; Unno et al.,  
940 2007). After treatment with the PROPKA-plugin in VMD to verify residue charge states at  
941 pH 7.0, (Humphrey et al., 1996; Rostkowski et al., 2011) *holo*-Dm3MaT3 was then  
942 submitted to the Solution Builder Input Generator in CHARMM-GUI (Jo et al., 2008).

943 Because 2E1T was crystallized as a dimer, only segment “A” of the protein was input to  
944 Solution Builder. The N- and C-terminal residues were modeled and patched using the  
945 ACE and CT3 terminal groupings, respectively. For the W36A and C320A Dm3MaT3  
946 mutants, the respective point mutations were also made during pdb structure  
947 manipulation. Resulting Dm3MaT3 models were solvated with 150 mM NaCl, neutralized,  
948 and output in Amber format. PyMol 2.3.3 was then used to perform structural alignment  
949 between the Dm3MaT3 models and the original 2E1T structure containing MLC so that  
950 the donor molecule could be introduced in the bound pose to each Dm3MaT3 model  
951 (Schrödinger, LLC, 2015). *Apo* simulations were prepared in a similar fashion but from  
952 the 2E1U PDB file (Unno et al., 2007).

953 The MLC structure file was taken directly from the 2E1T PDB file and edited in the  
954 Maestro 2017-3 Release for improved structural resolution by adding hydrogens not seen  
955 in the crystal structure and revising charge states at pH 7.0 (Schrödinger, LLC, 2020).  
956 Cyanidin 3-*O*-glucoside (C3G), the acyl-acceptor, was also edited in Maestro to reflect an  
957 accurate charge state at pH 7.0 (Schrödinger, LLC, 2020). Both ligands were introduced  
958 to antechamber and parameterized with the AM1-BCC charge model (Jakalian et al.,  
959 2002). At pH 7.0, MLC bears a net charge of -5 while C3G has a net charge of 0, although  
960 it is zwitterionic due to its oxonium moiety.

961

### 962 ***Docking of acyl acceptor into donor-containing Dm3MaT3 structures***

963 *Holo*-Dm3MaT3 was converted into a receptor pdbqt file for docking via AutoDock4  
964 command-line (Morris et al., 1998). The box for docking C3G into each *holo* Dm3MaT3  
965 variant (wild-type, WT; and mutants W36A and C320A) was determined in VMD  
966 (Humphrey et al., 1996). Autodock Vina v1.1.2 was then used for docking. A docking  
967 procedure was then performed using the previously determined box size and an  
968 exhaustiveness score of 8 (Trott and Olson, 2010). A low exhaustiveness score was used  
969 to obtain greater diversity of bound poses. This procedure was repeated 30 times in order  
970 to generate a greater number of different starting seeds for C3G, where bound poses for  
971 each iteration were evaluated based on the proximity of the reactive cyanidin 3-*O*-  
972 glucoside 6”-hydroxyl to be  $\leq 4.0$  Å from the thioate moiety of MLC (Unno et al., 2007),

973 as proximity between the two ligands would serve as a proxy for an intermediate step  
974 occurring within the reaction.

975 From this docking procedure, 268 C3G poses were generated for WT Dm3MaT3,  
976 270 poses for W36A Dm3MaT3, and 261 poses for C320A Dm3MaT3. Regardless of the  
977 orientation of the docked C3G, the pose selected for MD system assembly was that which  
978 had the most favorable energy among those with the shortest distance (less than or equal  
979 to 4 Å) from the MLC thioate. The C3G poses selected for simulation had docking scores  
980 of -5.8 kcal/mol (WT), -7.6 kcal/mol (W36A), and -6.4 kcal/mol (C320A) (**Fig. S10**).

981

### 982 ***Molecular simulation setup***

983 Each Dm3MaT3 system (WT, W36A, C320A) was then reassembled using the  
984 *holo*-aligned protein and MLC structures, the AutoDock Vina output, 150 mM NaCl, and  
985 ~18,500 water molecules in Packmol 18.169 (Martínez et al., 2009). Parameterization  
986 and periodic box conditions were then applied using tleap in Amber18 (Case et al., 2018).  
987 All ligands were parameterized with GAFF2 (Wang et al., 2004), Dm3MaT3 variants with  
988 the AMBER-FB15 (Wang et al., 2017), and water with the TIP3PFB forcefields (L.-P.  
989 Wang et al., 2014), respectively. Ions were parameterized using the 2008 parameter set  
990 developed Joung and Cheatham (Joung and Cheatham, 2008). Hydrogen mass  
991 repartitioning (Hopkins et al., 2015) was then applied to the resulting files in ParmEd 3.2.0  
992 (Case et al., 2018). *Apo* systems were prepared in an identical fashion.

993 The following conditions were then applied to all Dm3MaT3 systems during  
994 initialization stages. Minimization was performed for 50000 cycles, where steepest  
995 descent was used for the first 5000 and then conjugate gradient for the remaining 45000  
996 cycles. Each system was heated from 0 to 300 K in the NVT ensemble for 5 ns. The  
997 systems were then held at 300 K for 5 ns at NPT. A Berendsen thermostat and barostat  
998 were used throughout heating and equilibration stages for efficiency (Braun et al., 2018),  
999 where the pressure was maintained at 1 bar using isotropic scaling and temperature at  
1000 300 K (Berendsen et al., 1984). Each Dm3MaT3 variant and the bound ligands were  
1001 restrained during the heating simulation. Restraints were removed during the 50 ns  
1002 equilibration. The SHAKE algorithm was applied to all stages of initialization except for  
1003 minimization (Krautler et al., 2001), while the Particle Mesh Ewald method used for

1004 treating long-range electrostatics at a 10 Å cutoff (Darden et al., 1993). A Langevin  
1005 thermostat was implemented for temperature maintenance and a Monte Carlo barostat  
1006 was implemented for pressure maintenance in the production runs (Loncharich et al.,  
1007 1992; Åqvist et al., 2004). Simulations were performed for a total of 1 μs for each of the  
1008 six systems (*holo* and *apo* versions of Dm3MaT3 WT, W36A, and C320A).

1009

## 1010 **Data analysis**

1011 Trajectories were visualized using VMD 1.9.3 whereas images were rendered  
1012 using Chimera 1.14 (Humphrey et al., 1996; Pettersen et al., 2004). Distance  
1013 measurements between atoms were conducted using MDTraj 1.9.3 (McGibbon et al.,  
1014 2015). Residue-residue face-to-face and edge-to-face stacking interactions were  
1015 determined using a script which was adapted from a previously reported analysis  
1016 (Ferreira de Freitas and Schapira, 2017). Briefly, the plane of an aromatic residue's pi  
1017 system was determined using the same atoms as in GetContacts (*GetContacts*, 2020).  
1018 The normal vector was then determined for each aromatic plane under inspection, where  
1019 the intersection between the two vectors was solved for. Solving for the angle between  
1020 the center of mass of one aromatic ring, the center of mass of another aromatic, and the  
1021 intersection of the rings' normal vectors, allowed for the supplementary angle,  $\theta$ , to be  
1022 determined. Angle  $\theta$  and distance cutoffs were then applied to determine the extent of  
1023 aromatic stacking (Ferreira de Freitas and Schapira, 2017; "Schrödinger – Knowledge  
1024 Base.," 2020), where exact stacking classifications are detailed in Supplementary  
1025 Information. All graphs were generated using Matplotlib 3.2.0 (Hunter, 2007).

1026

1027 **ACKNOWLEDGEMENTS**

1028 We thank Dr. John D’Auria, Dr. Toru Nakayama and Dr. Sangeeta Dhaubhadel for  
1029 providing BAHD constructs, Dr. Bennett Fox and Dr. Frank Schroeder for use of and  
1030 assistance with the LC-MS experiments. We thank Dr. Thomas Stegemann for support in  
1031 LC-MS method establishment, Elizabeth Mahood and Dr. Nicholas Santantonio for  
1032 support in establishing the substrate similarity pipeline, Dr. Hening Lin for helpful advice  
1033 regarding our biochemical experiments, Dr. Elisabeth Kaltenecker for helpful comments  
1034 on the manuscript, and Anna-Lena Sprick and Dr. Kai Fan for support in the laboratory.  
1035 We thank Dr. Florian Boucher for assistance with interpreting BBMV R package output.

1036

1037 **COMPETING INTEREST**

1038 The authors declare that the research was conducted in the absence of any commercial  
1039 or financial relationship that could be construed as a potential conflict of interest.

1040

1041 **FUNDING INFORMATION**

1042 This work was supported by the following funding sources:

- 1043 • LK/GM: Deutsche Forschungsgemeinschaft award #411255989 (LK); Cornell startup  
1044 funds (GM)
- 1045 • JMG/CS: NSF award #DGE-1650441
- 1046 • JC: NSF REU award #DBI-1850796 to the Boyce Thompson Institute/Georg Jander
- 1047 • AW/DS: Blue Waters sustained-petascale computing project (NSF awards OCI-  
1048 0725070 and ACI-1238993, the State of Illinois, and the National Geospatial-  
1049 Intelligence Agency).

1050



## 1051 **REFERENCES**

- 1052 Afendi FM, Okada T, Yamazaki M, Hirai-Morita A, Nakamura Y, Nakamura K, Ikeda S,  
1053 Takahashi H, Altaf-Ul-Amin M, Darusman LK, Saito K, Kanaya S. 2012.  
1054 KNApSAcK Family Databases: Integrated Metabolite–Plant Species Databases  
1055 for Multifaceted Plant Research. *Plant Cell Physiol* **53**:e1–e1.  
1056 doi:10.1093/pcp/pcr165
- 1057 Aharoni A, Gaidukov L, Khersonsky O, Gould SM, Roodveldt C, Tawfik DS. 2005. The  
1058 “evolvability” of promiscuous protein functions. *Nat Genet* **37**:73–76.  
1059 doi:10.1038/ng1482
- 1060 Aharoni A, Keizer LC, Bouwmeester HJ, Sun Z, Alvarez-Huerta M, Verhoeven HA, Blaas  
1061 J, van Houwelingen AM, De Vos RC, van der Voet H. 2000. Identification of the  
1062 SAAT gene involved in strawberry flavor biogenesis by use of DNA microarrays.  
1063 *Plant Cell* **12**:647–661.
- 1064 Åqvist J, Wennerström P, Nervall M, Bjelic S, Brandsdal BO. 2004. Molecular dynamics  
1065 simulations of water and biomolecules with a Monte Carlo constant pressure  
1066 algorithm. *Chem Phys Lett* **384**:288–294. doi:10.1016/j.cplett.2003.12.039
- 1067 Bailey TL, Boden M, Buske FA, Frith M, Grant CE, Clementi L, Ren J, Li WW, Noble WS.  
1068 2009. MEME Suite: tools for motif discovery and searching. *Nucleic Acids Res*  
1069 **37**:W202–W208. doi:10.1093/nar/gkp335
- 1070 Bar-Even A, Noor E, Savir Y, Liebermeister W, Davidi D, Tawfik DS, Milo R. 2011. The  
1071 Moderately Efficient Enzyme: Evolutionary and Physicochemical Trends Shaping  
1072 Enzyme Parameters. *Biochemistry* **50**:4402–4410. doi:10.1021/bi2002289
- 1073 Berendsen HJC, Postma JPM, van Gunsteren WF, DiNola A, Haak JR. 1984. Molecular  
1074 dynamics with coupling to an external bath. *J Chem Phys* **81**:3684–3690.  
1075 doi:10.1063/1.448118
- 1076 Berman HM, Westbrook J, Feng Z, Gilliland G, Bhat TN, Weissig H, Shindyalov IN,  
1077 Bourne PE. 2000. The Protein Data Bank. *Nucleic Acids Res* **28**:235–242.  
1078 doi:10.1093/nar/28.1.235
- 1079 Beuerle T, Pichersky E. 2002. Enzymatic Synthesis and Purification of Aromatic  
1080 Coenzyme A Esters. *Anal Biochem* **302**:305–312. doi:10.1006/abio.2001.5574
- 1081 Bloom JD, Labthavikul ST, Otey CR, Arnold FH. 2006. Protein stability promotes  
1082 evolvability. *Proc Natl Acad Sci* **103**:5869–5874. doi:10.1073/pnas.0510098103
- 1083 Blount ZD, Borland CZ, Lenski RE. 2008. Historical contingency and the evolution of a  
1084 key innovation in an experimental population of *Escherichia coli*. *Proc Natl Acad*  
1085 *Sci* **105**:7899–7906. doi:10.1073/pnas.0803151105
- 1086 Boucher FC, Démercy V. 2016. Inferring Bounded Evolution in Phenotypic Characters from  
1087 Phylogenetic Comparative Data. *Syst Biol* **65**:651–661.  
1088 doi:10.1093/sysbio/syw015

- 1089 Bradford MM. 1976. A rapid and sensitive method for the quantitation of microgram  
1090 quantities of protein utilizing the principle of protein-dye binding. *Anal Biochem*  
1091 **72**:248–254. doi:10.1016/0003-2697(76)90527-3
- 1092 Braun E, Gilmer J, Mayes HB, Mobley DL, Monroe JI, Prasad S, Zuckerman DM. 2018.  
1093 Best Practices for Foundations in Molecular Simulations [Article v1.0]. *Living J*  
1094 *Comput Mol Sci* **1**:5957. doi:10.33011/livecoms.1.1.5957
- 1095 Camacho C, Coulouris G, Avagyan V, Ma N, Papadopoulos J, Bealer K, Madden TL.  
1096 2009. BLAST+: architecture and applications. *BMC Bioinformatics* **10**:421.  
1097 doi:10.1186/1471-2105-10-421
- 1098 Cao Y, Charisi A, Cheng L-C, Jiang T, Girke T. 2008. ChemmineR: a compound mining  
1099 framework for R. *Bioinformatics* **24**:1733–1734. doi:10.1093/bioinformatics/btn307
- 1100 Case DA, Ben-Shalom IY, Brozell SR, Cerutti DS, Cheatham TEI, Cruziero VWD, Darden  
1101 TA, Duke RE, Ghoreishi D, Gilson MK, Gohlke H, Goetz AW, Greene D, Harris R,  
1102 Homeyer N, Izadi S, Kovalenko A, Kurtzman T, Lee T-S, LeGrand S, Li P, Lin C,  
1103 Liu J, Luchko T, Luo R, Mermelstein DJ, Merz KM, Miao Y, Monard G, Nguyen C,  
1104 Nguyen H, Omelyan I, Onufriev A, Pan F, Qi R, Roe DR, Roitberg A, Sagui C,  
1105 Schott-Verdugo S, Shen J, Simmerling CL, Smith J, Salomon-Ferrer R, Swails J,  
1106 Walker RC, Wang J, Wei H, Wolf RM, Wu X, Xiao L, York DM, Kollman PA. 2018.  
1107 AMBER. San Francisco, CA: University of California, San Francisco.
- 1108 Cheng S, Xian W, Fu Y, Marin B, Keller J, Wu T, Sun W, Li X, Xu Y, Zhang Y, Wittek S,  
1109 Reder T, Günther G, Gontcharov A, Wang S, Li L, Liu X, Wang J, Yang H, Xu X,  
1110 Delaux P-M, Melkonian B, Wong GK-S, Melkonian M. 2019. Genomes of Subaerial  
1111 Zygnematophyceae Provide Insights into Land Plant Evolution. *Cell* **179**:1057-  
1112 1067.e14. doi:10.1016/j.cell.2019.10.019
- 1113 Chiang Y-C, Levsh O, Kei Lam C, Weng J-K, Wang Y. 2018a. Active Site Dynamics and  
1114 Substrate Permissiveness of Hydroxycinnamoyltransferase (HCT). *Biophys J*  
1115 **114**:583a–584a. doi:10.1016/j.bpj.2017.11.3193
- 1116 Chiang Y-C, Levsh O, Lam CK, Weng J-K, Wang Y. 2018b. Structural and dynamic basis  
1117 of substrate permissiveness in hydroxycinnamoyltransferase (HCT). *PLOS*  
1118 *Comput Biol* **14**:e1006511. doi:10.1371/journal.pcbi.1006511
- 1119 Copley SD. 2015. An evolutionary biochemist's perspective on promiscuity. *Trends*  
1120 *Biochem Sci* **40**:72–78. doi:10.1016/j.tibs.2014.12.004
- 1121 Darden T, York D, Pedersen L. 1993. Particle mesh Ewald: An N·log(N) method for Ewald  
1122 sums in large systems. *J Chem Phys* **98**:10089–10092. doi:10.1063/1.464397
- 1123 D'Auria JC. 2006. Acyltransferases in plants: a good time to be BAHD. *Curr Opin Plant*  
1124 *Biol* **9**:331–340. doi:10.1016/j.pbi.2006.03.016
- 1125 Davies KM, Jibrán R, Zhou Y, Albert NW, Brummell DA, Jordan BR, Bowman JL, Schwinn  
1126 KE. 2020. The Evolution of Flavonoid Biosynthesis: A Bryophyte Perspective.  
1127 *Front Plant Sci* **11**:7. doi:10.3389/fpls.2020.00007

- 1128 de Vries J, de Vries S, Slamovits CH, Rose LE, Archibald JM. 2017. How Embryophytic  
1129 is the Biosynthesis of Phenylpropanoids and their Derivatives in Streptophyte  
1130 Algae? *Plant Cell Physiol* **58**:934–945. doi:10.1093/pcp/pcx037
- 1131 Donoghue P, Paps J. 2020. Plant Evolution: Assembling Land Plants. *Curr Biol* **30**:R81–  
1132 R83. doi:10.1016/j.cub.2019.11.084
- 1133 Dudareva N, D’Auria JC, Nam KH, Raguso RA, Pichersky E. 1998. Acetyl-  
1134 CoA:benzylalcohol acetyltransferase – an enzyme involved in floral scent  
1135 production in *Clarkia breweri*. *Plant J* **14**:297–304. doi:10.1046/j.1365-  
1136 313X.1998.00121.x
- 1137 Emms DM, Kelly S. 2019. OrthoFinder: phylogenetic orthology inference for comparative  
1138 genomics. *bioRxiv* 466201. doi:10.1101/466201
- 1139 Eudes A., Mouille M, Robinson DS, Benites VT, Wang G, Roux L, Tsai YL, Baidoo EE,  
1140 Chiu TY, Heazlewood JL, Scheller HV, Mukhopadhyay A, Keasling JD, Deutsch  
1141 S, Loque D. 2016. Exploiting members of the BAHD acyltransferase family to  
1142 synthesize multiple hydroxycinnamate and benzoate conjugates in yeast. *Microb  
1143 Cell Fact* **15**:198. doi:10.1186/s12934-016-0593-5
- 1144 Eudes Aymerick, Pereira JH, Yogiswara S, Wang G, Teixeira Benites V, Baidoo EEK,  
1145 Lee TS, Adams PD, Keasling JD, Loqué D. 2016. Exploiting the Substrate  
1146 Promiscuity of Hydroxycinnamoyl-CoA:Shikimate Hydroxycinnamoyl Transferase  
1147 to Reduce Lignin. *Plant Cell Physiol* **57**:568–579. doi:10.1093/pcp/pcw016
- 1148 Fan P, Miller AM, Schillmiller AL, Liu X, Ofner I, Jones AD, Zamir D, Last RL. 2016. In  
1149 vitro reconstruction and analysis of evolutionary variation of the tomato  
1150 acylsucrose metabolic network. *Proc Natl Acad Sci* **113**:E239–E248.  
1151 doi:10.1073/pnas.1517930113
- 1152 Ferreira de Freitas R, Schapira M. 2017. A systematic analysis of atomic protein–ligand  
1153 interactions in the PDB. *MedChemComm* **8**:1970–1981.  
1154 doi:10.1039/C7MD00381A
- 1155 Fujiwara Hiroyuki, Tanaka Y, Fukui Y, Ashikari T, Yamaguchi M, Kusumi T. 1998.  
1156 Purification and characterization of anthocyanin 3-aromatic acyltransferase from  
1157 *Perilla frutescens*. *Plant Sci* **137**:87–94. doi:10.1016/S0168-9452(98)00119-8
- 1158 Fujiwara H, Tanaka Y, Fukui Y, Nakao M, Ashikari T, Kusumi T. 1997. Anthocyanin 5-  
1159 aromatic acyltransferase from *Gentiana triflora*: purification, characterization and  
1160 its role in anthocyanin biosynthesis. *Eur J Biochem* **249**:45–51.
- 1161 Fujiwara H., Tanaka Y, Yonekura-Sakakibara K, Fukuchi-Mizutani M, Nakao M, Fukui Y,  
1162 Yamaguchi M, Ashikari T, Kusumi T. 1998. cDNA cloning, gene expression and  
1163 subcellular localization of anthocyanin 5-aromatic acyltransferase from *Gentiana  
1164 triflora*. *Plant J* **16**:421–31. doi:10.1046/j.1365-313x.1998.00312.x
- 1165 Ganko EW, Meyers BC, Vision TJ. 2007. Divergence in Expression between Duplicated  
1166 Genes in Arabidopsis. *Mol Biol Evol* **24**:2298–2309. doi:10.1093/molbev/msm158
- 1167 GetContacts. 2020.

- 1168 Goulet C, Kamiyoshihara Y, Lam NB, Richard T, Taylor MG, Tieman DM, Klee HJ. 2015.  
1169 Divergence in the Enzymatic Activities of a Tomato and *Solanum pennellii* Alcohol  
1170 Acyltransferase Impacts Fruit Volatile Ester Composition. *Mol Plant, Plant*  
1171 *Metabolism and Synthetic Biology* **8**:153–162. doi:10.1016/j.molp.2014.11.007
- 1172 Harris TK, Mildvan AS. 1999. High-Precision Measurement of Hydrogen Bond Lengths in  
1173 Proteins by Nuclear Magnetic Resonance Methods. *Proteins Struct Funct*  
1174 *Bioinforma* **35**:275–282. doi:[https://doi.org/10.1002/\(SICI\)1097-](https://doi.org/10.1002/(SICI)1097-0134(19990515)35:3<275::AID-PROT1>3.0.CO;2-V)  
1175 [0134\(19990515\)35:3<275::AID-PROT1>3.0.CO;2-V](https://doi.org/10.1002/(SICI)1097-0134(19990515)35:3<275::AID-PROT1>3.0.CO;2-V)
- 1176 Hastings J, de Matos P, Dekker A, Ennis M, Harsha B, Kale N, Muthukrishnan V, Owen  
1177 G, Turner S, Williams M, Steinbeck C. 2013. The ChEBI reference database and  
1178 ontology for biologically relevant chemistry: enhancements for 2013. *Nucleic Acids*  
1179 *Res* **41**:D456–D463. doi:10.1093/nar/gks1146
- 1180 Hopkins CW, Le Grand S, Walker RC, Roitberg AE. 2015. Long-Time-Step Molecular  
1181 Dynamics through Hydrogen Mass Repartitioning. *J Chem Theory Comput*  
1182 **11**:1864–1874. doi:10.1021/ct5010406
- 1183 Huang R, O'Donnell AJ, Barboline JJ, Barkman TJ. 2016. Convergent evolution of  
1184 caffeine in plants by co-option of exapted ancestral enzymes. *Proc Natl Acad Sci*  
1185 **113**:10613–10618. doi:10.1073/pnas.1602575113
- 1186 Humphrey W, Dalke A, Schulten K. 1996. VMD: Visual molecular dynamics. *J Mol Graph*  
1187 **14**:33–38. doi:10.1016/0263-7855(96)00018-5
- 1188 Hunter JD. 2007. Matplotlib: A 2D Graphics Environment. *Comput Sci Eng* **9**:90–95.  
1189 doi:10.1109/MCSE.2007.55
- 1190 Jakalian A, Jack DB, Bayly CI. 2002. Fast, efficient generation of high-quality atomic  
1191 charges. AM1-BCC model: II. Parameterization and validation. *J Comput Chem*  
1192 **23**:1623–1641. doi:10.1002/jcc.10128
- 1193 Jensen RA. 1976. Enzyme recruitment in evolution of new function. *Annu Rev Microbiol*  
1194 **30**:409–425. doi:10.1146/annurev.mi.30.100176.002205
- 1195 Jo S, Kim T, Iyer VG, Im W. 2008. CHARMM-GUI: A web-based graphical user interface  
1196 for CHARMM. *J Comput Chem* **29**:1859–1865. doi:10.1002/jcc.20945
- 1197 Joung IS, Cheatham TE. 2008. Determination of Alkali and Halide Monovalent Ion  
1198 Parameters for Use in Explicitly Solvated Biomolecular Simulations. *J Phys Chem*  
1199 *B* **112**:9020–9041. doi:10.1021/jp8001614
- 1200 Kalyaanamoorthy S, Minh BQ, Wong TKF, von Haeseler A, Jermiin LS. 2017.  
1201 ModelFinder: fast model selection for accurate phylogenetic estimates. *Nat*  
1202 *Methods* **14**:587–589. doi:10.1038/nmeth.4285
- 1203 Katoh K, Misawa K, Kuma K, Miyata T. 2002. MAFFT: a novel method for rapid multiple  
1204 sequence alignment based on fast Fourier transform. *Nucleic Acids Res* **30**:3059–  
1205 3066.
- 1206 Krautler V, van Gunsteren WF, Hunenberger PH. 2001. A fast SHAKE algorithm to solve  
1207 distance constraint equations for small molecules in molecular dynamics  
1208 simulations. *J Comput Chem* **22**:501–508.

- 1209 Kreis W, Munkert J. 2019. Exploiting enzyme promiscuity to shape plant specialized  
1210 metabolism. *J Exp Bot* **70**:1435–1445. doi:10.1093/jxb/erz025
- 1211 Kruse LH, Stegemann T, Sievert C, Ober D. 2017. Identification of a Second Site of  
1212 Pyrrolizidine Alkaloid Biosynthesis in Comfrey to Boost Plant Defense in Floral  
1213 Stage. *Plant Physiol* **174**:47–55. doi:10.1104/pp.17.00265
- 1214 Leliaert F, Smith DR, Moreau H, Herron MD, Verbruggen H, Delwiche CF, Clerck OD.  
1215 2012. Phylogeny and Molecular Evolution of the Green Algae. *Crit Rev Plant Sci*  
1216 **31**:1–46. doi:10.1080/07352689.2011.615705
- 1217 Letunic I, Bork P. 2019. Interactive Tree Of Life (iTOL) v4: recent updates and new  
1218 developments. *Nucleic Acids Res* **47**:W256–W259. doi:10.1093/nar/gkz239
- 1219 Levsh O, Chiang Y-C, Tung CF, Noel JP, Wang Y, Weng J-K. 2016. Dynamic  
1220 conformational states dictate selectivity toward the native substrate in a substrate-  
1221 permissive acyltransferase. *Biochemistry* **55**:6314–6326.
- 1222 Loncharich RJ, Brooks BR, Pastor RW. 1992. Langevin dynamics of peptides: the  
1223 frictional dependence of isomerization rates of N-acetylalanyl-N'-methylamide.  
1224 *Biopolymers* **32**:523–535. doi:10.1002/bip.360320508
- 1225 Magallón S, Gómez-Acevedo S, Sánchez-Reyes LL, Hernández-Hernández T. 2015. A  
1226 metacalibrated time-tree documents the early rise of flowering plant phylogenetic  
1227 diversity. *New Phytol* **207**:437–453. doi:10.1111/nph.13264
- 1228 Mahood E, Kruse L, Moghe G. 2020. Machine learning: A powerful tool for gene function  
1229 prediction in plants. *Appl Plant Sci* **8**:e11376–e11376. doi:10.1002/aps3.11376
- 1230 Martínez L, Andrade R, Birgin EG, Martínez JM. 2009. PACKMOL: A package for building  
1231 initial configurations for molecular dynamics simulations. *J Comput Chem*  
1232 **30**:2157–2164. doi:10.1002/jcc.21224
- 1233 Matsumura I, Ellington AD. 2001. *In vitro* evolution of beta-glucuronidase into a beta-  
1234 galactosidase proceeds through non-specific intermediates. *J Mol Biol* **305**:331–  
1235 339. doi:10.1006/jmbi.2000.4259
- 1236 McGibbon RT, Beauchamp KA, Harrigan MP, Klein C, Swails JM, Hernández CX,  
1237 Schwantes CR, Wang L-P, Lane TJ, Pande VS. 2015. MDTraj: A Modern Open  
1238 Library for the Analysis of Molecular Dynamics Trajectories. *Biophys J* **109**:1528–  
1239 1532. doi:10.1016/j.bpj.2015.08.015
- 1240 Moghe GD, Hufnagel DE, Tang H, Xiao Y, Dworkin I, Town CD, Conner JK, Shiu S-H.  
1241 2014. Consequences of Whole-Genome Triplication as Revealed by Comparative  
1242 Genomic Analyses of the Wild Radish *Raphanus raphanistrum* and Three Other  
1243 Brassicaceae Species. *Plant Cell Online* **26**:1925–1937.  
1244 doi:10.1105/tpc.114.124297
- 1245 Moghe GD, Leong BJ, Hurney SM, Daniel Jones A, Last RL. 2017. Evolutionary routes  
1246 to biochemical innovation revealed by integrative analysis of a plant-defense  
1247 related specialized metabolic pathway. *eLife* **6**:e28468. doi:10.7554/eLife.28468
- 1248 Morris GM, Goodsell DS, Halliday RS, Huey R, Hart WE, Belew RK, Olson AJ. 1998.  
1249 Automated docking using a Lamarckian genetic algorithm and an empirical binding



- 1250 free energy function. *J Comput Chem* **19**:1639–1662. doi:[http://doi:](http://doi.org/10.1002/(SICI)1096-987X(19981115)19:14<1639::AID-JCC10>3.0.CO;2-B)  
1251 10.1002/(SICI)1096-987X(19981115)19:14<1639::AID-JCC10>3.0.CO;2-B
- 1252 Nguyen L-T, Schmidt HA, von Haeseler A, Minh BQ. 2015. IQ-TREE: A Fast and Effective  
1253 Stochastic Algorithm for Estimating Maximum-Likelihood Phylogenies. *Mol Biol*  
1254 *Evol* **32**:268–274. doi:10.1093/molbev/msu300
- 1255 Nie Y, Foster CSP, Zhu T, Yao R, Duchêne DA, Ho SYW, Zhong B. 2020. Accounting for  
1256 Uncertainty in the Evolutionary Timescale of Green Plants Through Clock-  
1257 Partitioning and Fossil Calibration Strategies. *Syst Biol* **69**:1–16.  
1258 doi:10.1093/sysbio/syz032
- 1259 Niggeweg R, Michael AJ, Martin C. 2004. Engineering plants with increased levels of the  
1260 antioxidant chlorogenic acid. *Nat Biotechnol* **22**:746–754. doi:10.1038/nbt966
- 1261 Nishiyama T, Sakayama H, de Vries J, Buschmann H, Saint-Marcoux D, Ullrich KK, Haas  
1262 FB, Vanderstraeten L, Becker D, Lang D, Vosolsobě S, Rombauts S, Wilhelmsson  
1263 PKI, Janitza P, Kern R, Heyl A, Rümpler F, Villalobos LIAC, Clay JM, Skokan R,  
1264 Toyoda A, Suzuki Y, Kagoshima H, Schijlen E, Tajeshwar N, Catarino B,  
1265 Hetherington AJ, Saltykova A, Bonnot C, Breuninger H, Symeonidi A,  
1266 Radhakrishnan GV, Van Nieuwerburgh F, Deforce D, Chang C, Karol KG, Hedrich  
1267 R, Ulvskov P, Glöckner G, Delwiche CF, Petrášek J, Van de Peer Y, Friml J, Beilby  
1268 M, Dolan L, Kohara Y, Sugano S, Fujiyama A, Delaux P-M, Quint M, Theißen G,  
1269 Hagemann M, Harholt J, Dunand C, Zachgo S, Langdale J, Maumus F, Van Der  
1270 Straeten D, Gould SB, Rensing SA. 2018. The *Chara* Genome: Secondary  
1271 Complexity and Implications for Plant Terrestrialization. *Cell* **174**:448-464.e24.  
1272 doi:10.1016/j.cell.2018.06.033
- 1273 Notebaart RA, Szappanos B, Kintsés B, Pál F, Györkei Á, Bogos B, Lázár V, Spohn R,  
1274 Csörgő B, Wagner A, Ruppín E, Pál C, Papp B. 2014. Network-level architecture  
1275 and the evolutionary potential of underground metabolism. *Proc Natl Acad Sci*  
1276 **111**:11762–11767. doi:10.1073/pnas.1406102111
- 1277 Panchy N, Lehti-Shiu M, Shiu S-H. 2016. Evolution of gene duplication in plants. *Plant*  
1278 *Physiol* **171**:2294–2316. doi:10.1104/pp.16.00523
- 1279 Paradis E, Schliep K. 2019. ape 5.0: an environment for modern phylogenetics and  
1280 evolutionary analyses in R. *Bioinformatics* **35**:526–528.  
1281 doi:10.1093/bioinformatics/bty633
- 1282 Payne JL, Wagner A. 2019. The causes of evolvability and their evolution. *Nat Rev Genet*  
1283 **20**:24–38. doi:10.1038/s41576-018-0069-z
- 1284 Peng M, Gao Y, Chen W, Wang W, Shen S, Shi J, Wang C, Zhang Y, Zou L, Wang S,  
1285 Wan J, Liu X, Gong L, Luo J. 2016. Evolutionarily Distinct BAHD N-  
1286 Acyltransferases Are Responsible for Natural Variation of Aromatic Amine  
1287 Conjugates in Rice. *Plant Cell* **28**:1533–50. doi:10.1105/tpc.16.00265
- 1288 Pettersen EF, Goddard TD, Huang CC, Couch GS, Greenblatt DM, Meng EC, Ferrin TE.  
1289 2004. UCSF Chimera--a visualization system for exploratory research and  
1290 analysis. *J Comput Chem* **25**:1605–1612. doi:10.1002/jcc.20084



- 1291 Philippe G, Sørensen I, Jiao C, Sun X, Fei Z, Domozych DS, Rose JK. 2020. Cutin and  
1292 suberin: assembly and origins of specialized lipidic cell wall scaffolds. *Curr Opin*  
1293 *Plant Biol, Physiology and Metabolism* **55**:11–20. doi:10.1016/j.pbi.2020.01.008
- 1294 Piatkowski BT, Imwattana K, Tripp EA, Weston DJ, Healey A, Schmutz J, Shaw AJ. 2020.  
1295 Phylogenomics reveals convergent evolution of red-violet coloration in land plants  
1296 and the origins of the anthocyanin biosynthetic pathway. *Mol Phylogenet Evol*  
1297 **151**:106904. doi:10.1016/j.ympev.2020.106904
- 1298 Pigliucci M. 2008. Is evolvability evolvable? *Nat Rev Genet* **9**:75–82. doi:10.1038/nrg2278
- 1299 Potter SC, Luciani A, Eddy SR, Park Y, Lopez R, Finn RD. 2018. HMMER web server:  
1300 2018 update. *Nucleic Acids Res* **46**:W200–W204. doi:10.1093/nar/gky448
- 1301 Renault H, Werck-Reichhart D, Weng J-K. 2019. Harnessing lignin evolution for  
1302 biotechnological applications. *Curr Opin Biotechnol, Food Biotechnology • Plant*  
1303 *Biotechnology* **56**:105–111. doi:10.1016/j.copbio.2018.10.011
- 1304 Rostkowski M, Olsson MH, Søndergaard CR, Jensen JH. 2011. Graphical analysis of pH-  
1305 dependent properties of proteins predicted using PROPKA. *BMC Struct Biol* **11**:6.  
1306 doi:10.1186/1472-6807-11-6
- 1307 Sander M, Petersen M. 2011. Distinct substrate specificities and unusual substrate  
1308 flexibilities of two hydroxycinnamoyltransferases, rosmarinic acid synthase and  
1309 hydroxycinnamoyl-CoA:shikimate hydroxycinnamoyl-transferase, from *Coleus*  
1310 *blumei* Benth. *Planta* **233**:1157–71. doi:10.1007/s00425-011-1367-2
- 1311 Sanderson MJ. 2002. Estimating Absolute Rates of Molecular Evolution and Divergence  
1312 Times: A Penalized Likelihood Approach. *Mol Biol Evol* **19**:101–109.  
1313 doi:10.1093/oxfordjournals.molbev.a003974
- 1314 Schmidt GW, Jirschitzka J, Porta T, Reichelt M, Luck K, Torre JCP, Dolke F, Varesio E,  
1315 Hopfgartner G, Gershenzon J, D’Auria JC. 2015. The Last Step in Cocaine  
1316 Biosynthesis Is Catalyzed by a BAHD Acyltransferase. *Plant Physiol* **167**:89–101.  
1317 doi:10.1104/pp.114.248187
- 1318 Schnable JC, Springer NM, Freeling M. 2011. Differentiation of the maize subgenomes  
1319 by genome dominance and both ancient and ongoing gene loss. *Proc Natl Acad*  
1320 *Sci* **108**:4069–4074. doi:10.1073/pnas.1101368108
- 1321 Schrödinger – Knowledge Base. 2020.
- 1322 Schrödinger, LLC. 2020. Schrödinger Release 2020-1: Maestro.
- 1323 Schrödinger, LLC. 2015. The AxPyMOL Molecular Graphics Plugin for Microsoft  
1324 PowerPoint, Version 1.8.
- 1325 Shannon P, Markiel A, Ozier O, Baliga NS, Wang JT, Ramage D, Amin N, Schwikowski  
1326 B, Ideker T. 2003. Cytoscape: A Software Environment for Integrated Models of  
1327 Biomolecular Interaction Networks. *Genome Res* **13**:2498–2504.  
1328 doi:10.1101/gr.1239303
- 1329 Shaw WV, Leslie AGW. 1991. Chloramphenicol Acetyltransferase. *Annu Rev Biophys*  
1330 *Biophys Chem* **20**:363–386. doi:10.1146/annurev.bb.20.060191.002051

- 1331 St Pierre B, De Luca V. 2000. Evolution of acyltransferase genes: Origin and  
1332 diversification of the BAHD superfamily of acyltransferases involved in secondary  
1333 metabolism In: Romeo JT, Ibrahim R, Varin L, De Luca V, editors. Recent  
1334 Advances in Phytochemistry, Evolution of Metabolic Pathways. Elsevier. pp. 285–  
1335 315. doi:10.1016/S0079-9920(00)80010-6
- 1336 St-Pierre B, Vazquez-Flota FA, Luca VD. 1999. Multicellular compartmentation of  
1337 *Catharanthus roseus* alkaloid biosynthesis predicts intercellular translocation of a  
1338 pathway intermediate. *Plant Cell* **11**:887–900. doi:10.1105/tpc.11.5.887
- 1339 Suzuki H, Nakayama T, Nishino T. 2003. Proposed mechanism and functional amino acid  
1340 residues of malonyl-CoA : anthocyanin 5-O-glucoside-6'''-O-malonyltransferase  
1341 from flowers of *Salvia splendens*, a member of the versatile plant acyltransferase  
1342 family. *Biochemistry* **42**:1764–1771. doi:10.1021/bi020618g
- 1343 Tanner KG, Trievel RC, Kuo M-H, Howard RM, Berger SL, Allis CD, Marmorstein R, Denu  
1344 JM. 1999. Catalytic Mechanism and Function of Invariant Glutamic Acid 173 from  
1345 the Histone Acetyltransferase GCN5 Transcriptional Coactivator. *J Biol Chem*  
1346 **274**:18157–18160. doi:10.1074/jbc.274.26.18157
- 1347 Tokuriki N, Tawfik DS. 2009. Protein Dynamism and Evolvability. *Science* **324**:203–207.  
1348 doi:10.1126/science.1169375
- 1349 Trott O, Olson AJ. 2010. AutoDock Vina: improving the speed and accuracy of docking  
1350 with a new scoring function, efficient optimization and multithreading. *J Comput*  
1351 *Chem* **31**:455–461. doi:10.1002/jcc.21334
- 1352 Tuominen LK, Johnson VE, Tsai C-J. 2011. Differential phylogenetic expansions in BAHD  
1353 acyltransferases across five angiosperm taxa and evidence of divergent  
1354 expression among *Populus* paralogues. *BMC Genomics* **12**:236.  
1355 doi:10.1186/1471-2164-12-236
- 1356 Unno H, Ichimaida F, Suzuki H, Takahashi S, Tanaka Y, Saito A, Nishino T, Kusunoki M,  
1357 Nakayama T. 2007. Structural and Mutational Studies of Anthocyanin  
1358 Malonyltransferases Establish the Features of BAHD Enzyme Catalysis. *J Biol*  
1359 *Chem* **282**:15812–15822. doi:10.1074/jbc.M700638200
- 1360 Vries J de, Rensing SA. 2020. Gene gains paved the path to land. *Nat Plants* **6**:7–8.  
1361 doi:10.1038/s41477-019-0579-5
- 1362 Wagner A. 2008. Robustness and evolvability: a paradox resolved. *Proc R Soc B Biol Sci*  
1363 **275**:91–100. doi:10.1098/rspb.2007.1137
- 1364 Wagner A. 2005. Robustness, evolvability, and neutrality. *FEBS Lett, Systems Biology*  
1365 **579**:1772–1778. doi:10.1016/j.febslet.2005.01.063
- 1366 Wang J, Marowsky NC, Fan C. 2014. Divergence of Gene Body DNA Methylation and  
1367 Evolution of Plant Duplicate Genes. *PLOS ONE* **9**:e110357.  
1368 doi:10.1371/journal.pone.0110357
- 1369 Wang J, Wolf RM, Caldwell JW, Kollman PA, Case DA. 2004. Development and testing  
1370 of a general amber force field. *J Comput Chem* **25**:1157–1174.  
1371 doi:10.1002/jcc.20035

- 1372 Wang L-P, Martinez TJ, Pande VS. 2014. Building Force Fields: An Automatic,  
1373 Systematic, and Reproducible Approach. *J Phys Chem Lett* **5**:1885–1891.  
1374 doi:10.1021/jz500737m
- 1375 Wang L-P, McKiernan KA, Gomes J, Beauchamp KA, Head-Gordon T, Rice JE, Swope  
1376 WC, Martínez TJ, Pande VS. 2017. Building a More Predictive Protein Force Field:  
1377 A Systematic and Reproducible Route to AMBER-FB15. *J Phys Chem B*  
1378 **121**:4023–4039. doi:10.1021/acs.jpcc.7b02320
- 1379 Wang Y, Backman TWH, Horan K, Girke T. 2013. fmcsR: mismatch tolerant maximum  
1380 common substructure searching in R. *Bioinformatics* **29**:2792–2794.  
1381 doi:10.1093/bioinformatics/btt475
- 1382 Weng J-K, Chapple C. 2010. The origin and evolution of lignin biosynthesis. *New Phytol*  
1383 **187**:273–285. doi:<https://doi.org/10.1111/j.1469-8137.2010.03327.x>
- 1384 Yang Q, Reinhard K, Schiltz E, Matern U. 1997. Characterization and heterologous  
1385 expression of hydroxycinnamoyl/benzoyl-CoA:anthranilate N-  
1386 hydroxycinnamoyl/benzoyltransferase from elicited cell cultures of carnation,  
1387 *Dianthus caryophyllus* L. *Plant Mol Biol* **35**:777–789.  
1388 doi:10.1023/A:1005878622437
- 1389 Zou C, Lehti-Shiu MD, Thomashow M, Shiu S-H. 2009. Evolution of Stress-Regulated  
1390 Gene Expression in Duplicate Genes of *Arabidopsis thaliana*. *PLOS Genet*  
1391 **5**:e1000581. doi:10.1371/journal.pgen.1000581
- 1392
- 1393

1394 **SUPPLEMENTARY TABLES**

1395 **Table S1: Substrate class definitions.** Substrates were grouped into different classes based on their  
 1396 chemical properties and their membership in known compound classes. Also see **Fig. S1A**.

| Scaffold            | Class | Definition                                                                                                                                                                                                                                                                                                                                                      | Exemplary structures                                                          |
|---------------------|-------|-----------------------------------------------------------------------------------------------------------------------------------------------------------------------------------------------------------------------------------------------------------------------------------------------------------------------------------------------------------------|-------------------------------------------------------------------------------|
| Aromatic alcohols   | A     | Substrates were classified as aromatic alcohols when they contained a planar ring of carbon atoms and a hydroxy group attached to a sidechain. Compounds containing additional hydroxy groups directly attached to the ring were also classified into this category. All substrates in this class except 2-naphthaleneethanol had one ring.                     | Benzoyl alcohol, Coniferyl alcohol, Shikimate, Quinate                        |
| Anthocyanins        | D     | Substrates were grouped into the anthocyanins category if they fulfill the classical definition of an anthocyanin: contain an anthocyanidin (flavylium cation) with attached sugar group(s).                                                                                                                                                                    | Cyanidin 3-O glucoside, Cyanidin 3-5-O glucoside, Pelargonidin 3-O rutinoside |
| Flavonoids          | D     | Substrates being a flavonoid or isoflavonoid were grouped into this category. Flavonoids are generally defined as having a 15-carbon skeleton which contains two benzene rings that are connected with a 3-carbon linking chain. Also, flavonoid glucosides were grouped into this class.                                                                       | Naringin, Genistin, Quercetin 3-O- sophoroside                                |
| Aliphatic amines    | B     | Aliphatic amines were defined as amines not containing any aromatic rings but were allowed to contain more than one amine group and or have additional hydroxy groups.                                                                                                                                                                                          | Agmatine, Putrescine, Spermidine                                              |
| Aliphatic alcohols  | B     | Aliphatic alcohols do not contain any aromatic rings but can range from short chain to very long chains. We also grouped fatty acids into this category because of their high chemical similarity.                                                                                                                                                              | 1-Butanol, 1-Decanol, 16-Hydroxypalmitic acid                                 |
| Monoterpenoids      | C     | Compounds formally containing of isoprene that do not contain aromatic rings or had branched chains were classified as terpenoids.                                                                                                                                                                                                                              | Geraniol, Nerol, Linalool                                                     |
| Sesquiterpenoids    | C     | Compounds build from three isoprene units.                                                                                                                                                                                                                                                                                                                      | Farnesol                                                                      |
| Aromatic amines     | A     | Substrates containing an aromatic ring and an amine group were classified as aromatic amines. However, substrates containing an additional hydroxy group were also categorized as aromatic amine because their chemistry was expected to be more similar to amines than to aromatic alcohols, due to presence of the positively charged -NH <sub>2</sub> group. | Tyramine, Dopamine, 3-Aminobenzoate                                           |
| Alkaloids           | Mix   | Substrates were classified as alkaloids if they contained a heterocyclic bound nitrogen atom.                                                                                                                                                                                                                                                                   | Methylecgonine, Tryptamine, Serotonin                                         |
| Phenolic glycosides | D     | We classified substrates as phenolic glycosides if they contained a sugar group bound via a glycosidic bond to a aromatic molecule that could not be classified as either flavonoids or anthocyanins.                                                                                                                                                           | Scopolin, 1-Naphtol glucoside, Umbelliferone glucoside                        |
| Sugar derivatives   | G     | Substrates classified as sugar derivatives are either mono- and disaccharides and their acylated variants.                                                                                                                                                                                                                                                      | Sucrose, Glucose, S1:5(5)                                                     |
| Diterpenoids        | E     | Substrates involved in the biosynthesis of taxenes were grouped into the diterpenoid class                                                                                                                                                                                                                                                                      | Baccatin III, 10-Deacetylbaaccatin III, Taxadien-5a-ol                        |
| Triterpenoids       | F     | Compounds that consisted of six isoprene units were grouped into the triterpenoid class.                                                                                                                                                                                                                                                                        | Thalianol, Arabidiol, Tirucalla-7,24-dien-3beta-ol                            |

1397

1398 **Table S2. BAHD acyltransferases in the *Solanum lycopersicum* (tomato) genome.** For characterized  
 1399 BAHDs their name and the respective reference is given.

| Protein ID         | PFAM name   | domain | Pfam ID    | Name/ Annotation | Reference               |
|--------------------|-------------|--------|------------|------------------|-------------------------|
| Solyc08g005770.2.1 | Transferase |        | PF02458.15 | SIAAT1           | (Goulet et al., 2015)   |
| Solyc08g005760.1.1 | Transferase |        | PF02458.15 | SIAAT2           | (Goulet et al., 2015)   |
| Solyc11g071470.1.1 | Transferase |        | PF02458.15 | SIACT1           | <b>this study</b>       |
| Solyc11g071480.1.1 | Transferase |        | PF02458.15 | SIACT2           | <b>this study</b>       |
| Solyc12g006330.1.1 | Transferase |        | PF02458.15 | SIASAT1          | (Fan et al., 2016)      |
| Solyc04g012020.1.1 | Transferase |        | PF02458.15 | SIASAT2          | (Fan et al., 2016)      |
| Solyc11g067270.1.1 | Transferase |        | PF02458.15 | SIASAT3          | (Fan et al., 2016)      |
| Solyc01g105580.1.1 | Transferase |        | PF02458.15 | SIASAT4          | (Fan et al., 2016)      |
| Solyc03g117600.2.1 | Transferase |        | PF02458.15 | SIHCT            | <b>this study</b>       |
| Solyc07g005760.2.1 | Transferase |        | PF02458.15 | SIHQT            | (Niggeweg et al., 2004) |
| Solyc05g052670.1.1 | Transferase |        | PF02458.15 |                  |                         |
| Solyc05g052680.1.1 | Transferase |        | PF02458.15 |                  |                         |
| Solyc11g008630.1.1 | Transferase |        | PF02458.15 |                  |                         |
| Solyc07g015960.1.1 | Transferase |        | PF02458.15 |                  |                         |
| Solyc09g014280.1.1 | Transferase |        | PF02458.15 |                  |                         |
| Solyc03g097500.2.1 | Transferase |        | PF02458.15 |                  |                         |
| Solyc02g079490.2.1 | Transferase |        | PF02458.15 |                  |                         |
| Solyc07g014580.2.1 | Transferase |        | PF02458.15 |                  |                         |
| Solyc05g014330.1.1 | Transferase |        | PF02458.15 |                  |                         |
| Solyc07g049660.2.1 | Transferase |        | PF02458.15 |                  |                         |
| Solyc08g005890.2.1 | Transferase |        | PF02458.15 |                  |                         |
| Solyc07g049670.2.1 | Transferase |        | PF02458.15 |                  |                         |
| Solyc03g025320.2.1 | Transferase |        | PF02458.15 |                  |                         |
| Solyc04g078660.1.1 | Transferase |        | PF02458.15 |                  |                         |
| Solyc05g015800.2.1 | Transferase |        | PF02458.15 |                  |                         |
| Solyc02g093180.2.1 | Transferase |        | PF02458.15 |                  |                         |
| Solyc04g079720.2.1 | Transferase |        | PF02458.15 |                  |                         |
| Solyc06g074710.1.1 | Transferase |        | PF02458.15 |                  |                         |
| Solyc07g006680.1.1 | Transferase |        | PF02458.15 |                  |                         |
| Solyc12g096250.1.1 | Transferase |        | PF02458.15 |                  |                         |
| Solyc06g051320.2.1 | Transferase |        | PF02458.15 |                  |                         |
| Solyc04g082350.1.1 | Transferase |        | PF02458.15 |                  |                         |
| Solyc01g105550.1.1 | Transferase |        | PF02458.15 |                  |                         |
| Solyc01g107080.2.1 | Transferase |        | PF02458.15 |                  |                         |
| Solyc02g062710.1.1 | Transferase |        | PF02458.15 |                  |                         |

|                           |             |            |
|---------------------------|-------------|------------|
| <b>Solyc11g066640.1.1</b> | Transferase | PF02458.15 |
| <b>Solyc08g013830.1.1</b> | Transferase | PF02458.15 |
| <b>Solyc07g006670.1.1</b> | Transferase | PF02458.15 |
| <b>Solyc04g080720.2.1</b> | Transferase | PF02458.15 |
| <b>Solyc02g081740.1.1</b> | Transferase | PF02458.15 |
| <b>Solyc01g105590.2.1</b> | Transferase | PF02458.15 |
| <b>Solyc06g051130.1.1</b> | Transferase | PF02458.15 |
| <b>Solyc08g014490.1.1</b> | Transferase | PF02458.15 |
| <b>Solyc07g043700.1.1</b> | Transferase | PF02458.15 |
| <b>Solyc12g088170.1.1</b> | Transferase | PF02458.15 |
| <b>Solyc07g043710.2.1</b> | Transferase | PF02458.15 |
| <b>Solyc02g081760.1.1</b> | Transferase | PF02458.15 |
| <b>Solyc12g096770.1.1</b> | Transferase | PF02458.15 |
| <b>Solyc00g040390.1.1</b> | Transferase | PF02458.15 |
| <b>Solyc07g043670.1.1</b> | Transferase | PF02458.15 |
| <b>Solyc02g081800.1.1</b> | Transferase | PF02458.15 |
| <b>Solyc12g010980.1.1</b> | Transferase | PF02458.15 |
| <b>Solyc02g081750.1.1</b> | Transferase | PF02458.15 |
| <b>Solyc08g075210.1.1</b> | Transferase | PF02458.15 |
| <b>Solyc11g069680.1.1</b> | Transferase | PF02458.15 |
| <b>Solyc12g096790.1.1</b> | Transferase | PF02458.15 |
| <b>Solyc11g067290.1.1</b> | Transferase | PF02458.15 |
| <b>Solyc12g096800.1.1</b> | Transferase | PF02458.15 |
| <b>Solyc01g068140.2.1</b> | Transferase | PF02458.15 |
| <b>Solyc11g067340.1.1</b> | Transferase | PF02458.15 |
| <b>Solyc07g008380.1.1</b> | Transferase | PF02458.15 |
| <b>Solyc07g008390.1.1</b> | Transferase | PF02458.15 |
| <b>Solyc12g005430.1.1</b> | Transferase | PF02458.15 |
| <b>Solyc11g067330.1.1</b> | Transferase | PF02458.15 |
| <b>Solyc02g081770.1.1</b> | Transferase | PF02458.15 |
| <b>Solyc12g005440.1.1</b> | Transferase | PF02458.15 |
| <b>Solyc05g039950.1.1</b> | Transferase | PF02458.15 |
| <b>Solyc00g040290.1.1</b> | Transferase | PF02458.15 |
| <b>Solyc07g017320.1.1</b> | Transferase | PF02458.15 |
| <b>Solyc01g008300.1.1</b> | Transferase | PF02458.15 |
| <b>Solyc11g020640.1.1</b> | Transferase | PF02458.15 |
| <b>Solyc10g079570.1.1</b> | Transferase | PF02458.15 |
| <b>Solyc10g008680.1.1</b> | Transferase | PF02458.15 |
| <b>Solyc04g009680.1.1</b> | Transferase | PF02458.15 |



|                           |             |            |
|---------------------------|-------------|------------|
| <b>Solyc07g052060.2.1</b> | Transferase | PF02458.15 |
| <b>Solyc12g087980.1.1</b> | Transferase | PF02458.15 |
| <b>Solyc09g092270.2.1</b> | Transferase | PF02458.15 |
| <b>Solyc08g075180.1.1</b> | Transferase | PF02458.15 |
| <b>Solyc05g052650.2.1</b> | Transferase | PF02458.15 |
| <b>Solyc10g055730.1.1</b> | Transferase | PF02458.15 |
| <b>Solyc00g135260.1.1</b> | Transferase | PF02458.15 |
| <b>Solyc01g107070.2.1</b> | Transferase | PF02458.15 |
| <b>Solyc05g050760.1.1</b> | Transferase | PF02458.15 |
| <b>Solyc01g005900.2.1</b> | Transferase | PF02458.15 |
| <b>Solyc00g134620.1.1</b> | Transferase | PF02458.15 |
| <b>Solyc01g107050.2.1</b> | Transferase | PF02458.15 |
| <b>Solyc08g007210.2.1</b> | Transferase | PF02458.15 |
| <b>Solyc08g078030.2.1</b> | Transferase | PF02458.15 |
| <b>Solyc08g075200.1.1</b> | Transferase | PF02458.15 |
| <b>Solyc07g026890.1.1</b> | Transferase | PF02458.15 |
| <b>Solyc11g067350.1.1</b> | Transferase | PF02458.15 |
| <b>Solyc05g015810.1.1</b> | Transferase | PF02458.15 |
| <b>Solyc06g071940.1.1</b> | Transferase | PF02458.15 |
| <b>Solyc03g078130.1.1</b> | Transferase | PF02458.15 |
| <b>Solyc10g008670.2.1</b> | Transferase | PF02458.15 |
| <b>Solyc04g009670.1.1</b> | Transferase | PF02458.15 |
| <b>Solyc08g036440.1.1</b> | Transferase | PF02458.15 |
| <b>Solyc04g078350.1.1</b> | Transferase | PF02458.15 |
| <b>Solyc12g044660.1.1</b> | Transferase | PF02458.15 |

1400  
1401



|                             | (1.45)                                |                                      | (1.25)                                              |          |                              |
|-----------------------------|---------------------------------------|--------------------------------------|-----------------------------------------------------|----------|------------------------------|
| Malvidin 3-O glucoside      | <b>639.1713</b><br>331.0835<br>(1.65) | <b>669.1820</b><br>331.0829<br>(1.6) | <b>579.1350</b><br>331.0835<br>(1.45)               | positive | 4-min method                 |
| Pelargonidin 3-O rutinoside | <b>725.2080</b><br>n.d.               | <b>755.2270</b><br>271.0604<br>(1.5) | <b>665.1717</b><br>n.t.                             | positive | 4-min method                 |
| Cyanidin 3-O glucoside      | <b>595.1451</b><br>287.0546<br>(1.6)  | <b>625.1558</b><br>287.0541<br>(1.5) | <b>535.1088</b><br>287.0544<br>(2.5 (8-min method)) | positive | 4-min method<br>8-min method |
| Cyanidin 3-O rutinoside     | <b>741.2029</b><br>287.0546<br>(1.25) | <b>771.2136</b><br>287.0545<br>(1.5) | <b>681.1666</b><br>n.t.                             | positive | 4-min method                 |
| Linalool                    | <b>299.1725</b><br>n.d.               | <b>329.183165</b><br>n.d.            | <b>239.1362</b><br>n.d.                             | negative | 8-min method                 |
| Geraniol                    | <b>299.1654</b><br>163.0393<br>(4.9)  | <b>329.1754</b><br>329.1754<br>(4.9) | <b>239.1362</b><br>n.d.                             | negative | 8-min method                 |
| Cucurbitacin E              | <b>701.3380</b><br>175.0393<br>(4.3)  | <b>731.3502</b><br>175.0393<br>(4.4) | <b>641.2967</b><br>n.d.                             | negative | 8-min method                 |

1408 **Table S5. LC methods used for analyzing enzyme assay reactions.** All solvents and reagents used  
 1409 were LC-MS grade quality. For the 150 mm column, a 2 mm C18 guard column (AJ0-8782, SecurityGuard  
 1410 Ultra, 2.1 mm, Phenomenex, Torrance, CA) was used. The autosampler was kept at 20 °C and the column  
 1411 compartment was heated to 40 °C. For negative ion mode, the mass spectrometer parameters were as  
 1412 follows: spray voltage 3800V, capillary temperature 380C, sheath gas pressure 60 psi, auxiliary gas 20 psi,  
 1413 spare gas 2 psi, max. spray current 100eV, probe 400C, RF lens 50V, and a collision energy ramped from  
 1414 20 to 40 eV. For positive ion mode MS parameters were the same except for the spray voltage that was  
 1415 set to 3500V.

| <b>4min-C18</b> |                  |    |    |       |                                                                                 |                                                                                                            |
|-----------------|------------------|----|----|-------|---------------------------------------------------------------------------------|------------------------------------------------------------------------------------------------------------|
|                 | Flow<br>(mL/min) | %A | %B | Curve | Solvents                                                                        | Column                                                                                                     |
|                 |                  |    |    |       | A: Water + 0.01% (v/v) Formic acid<br>B: Acetonitrile + 0.01% (v/v) Formic acid | Kinetex PS C18 (00B-4780-AN, 2.6µm particle size, 100Å pore size, 50 x 2.10 mm, Phenomenex (Torrance, CA)) |
| <b>Initial</b>  | 0.6              | 95 | 5  | 5     |                                                                                 |                                                                                                            |
| <b>0.5</b>      | 0.6              | 95 | 5  | 5     |                                                                                 |                                                                                                            |
| <b>3.0</b>      | 0.6              | 30 | 70 | 5     |                                                                                 |                                                                                                            |
| <b>3.3</b>      | 0.6              | 95 | 5  | 5     |                                                                                 |                                                                                                            |
| <b>3.6</b>      | 0.6              | 5  | 95 | 5     |                                                                                 |                                                                                                            |
| <b>4.0</b>      | 0.6              | 5  | 95 | 5     |                                                                                 |                                                                                                            |
| <b>8min-C18</b> |                  |    |    |       |                                                                                 |                                                                                                            |
|                 | Flow<br>(mL/min) | %A | %B | Curve | Solvents                                                                        | Column                                                                                                     |
|                 |                  |    |    |       | A: Water+0.01% (v/v) Formic acid<br>B: Acetonitrile + 0.01% (v/v) Formic acid   | Kinetex C18 (00F-4462-AN, 2.6µm particle size, 100Å pore size, 150 x 2.10 mm, Phenomenex (Torrance, CA))   |
| <b>Initial</b>  | 0.6              | 95 | 5  | 5     |                                                                                 |                                                                                                            |
| <b>1</b>        | 0.6              | 95 | 5  | 5     |                                                                                 |                                                                                                            |
| <b>5.6</b>      | 0.6              | 5  | 95 | 5     |                                                                                 |                                                                                                            |
| <b>6.6</b>      | 0.6              | 5  | 95 | 5     |                                                                                 |                                                                                                            |
| <b>6.61</b>     | 0.6              | 5  | 95 | 5     |                                                                                 |                                                                                                            |
| <b>7.5</b>      | 0.6              | 95 | 5  | 5     |                                                                                 |                                                                                                            |
| <b>8.0</b>      | 0.6              | 95 | 5  | 5     |                                                                                 |                                                                                                            |

1416

**Figure S1**

**A**

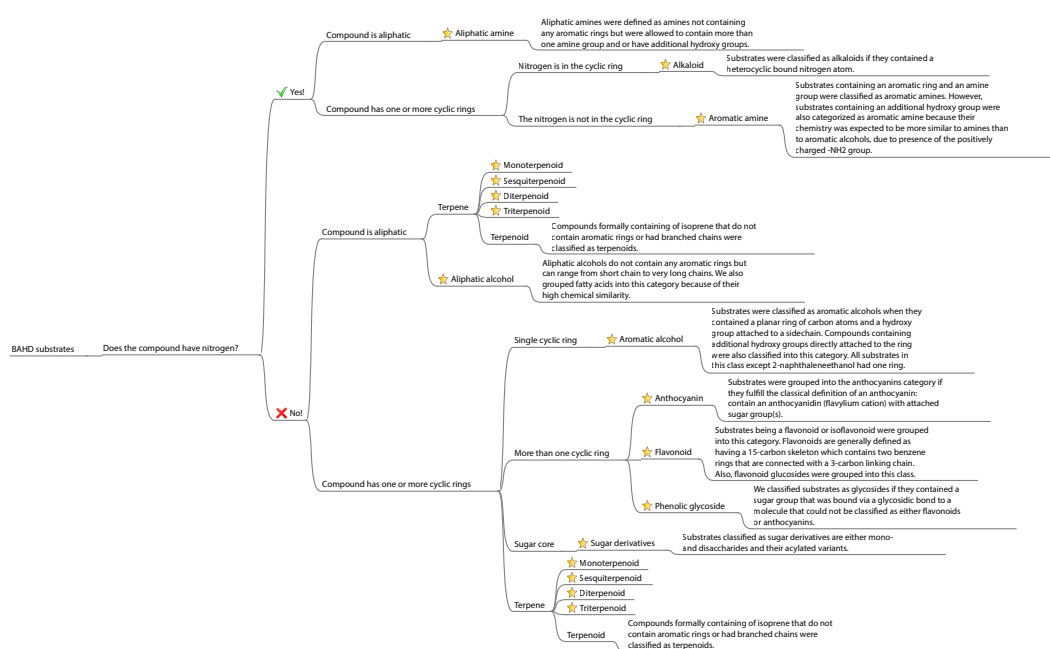

**B**

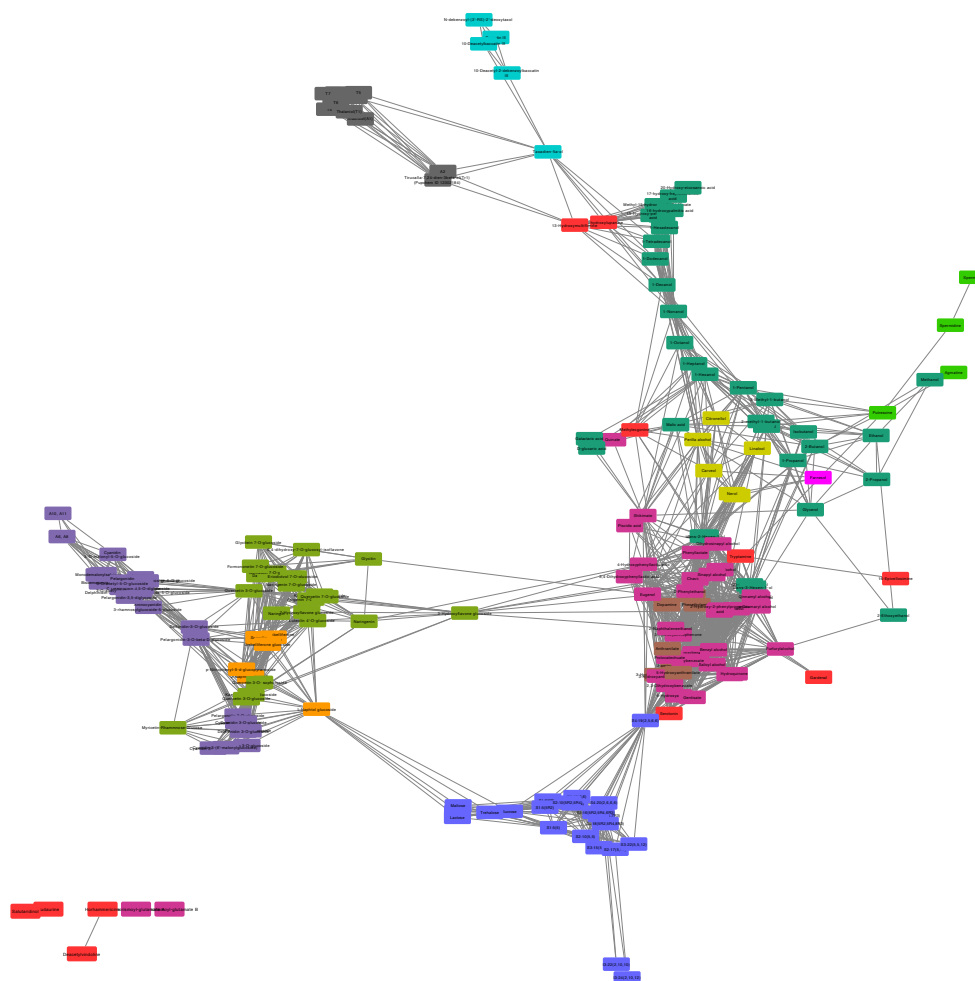

**Figure S1: Substrate classification and BAHD substrates represented using an alternative layout. (A)** Decision tree to group BAHD substrates into different substrate types. Further information about substrate class definitions can be found in **Table S1**. **(B)** The network was created in the same way and is colored the same way as **Fig. 1A**. The “Edge-weighted Spring Embedded” Layout using MCS-Tanimoto coefficient was used to create an edge-weighted network.

**Figure S2**

**A**

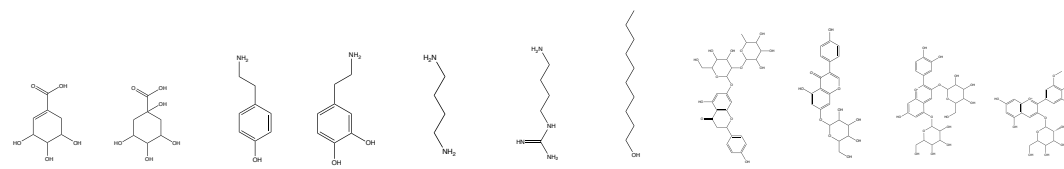

| Enzyme      | Donor         | acceptor concentration | aromatic alcohols |                 | aromatic amines |               | aliphatic amines     |                    | aliphatic alcohols | flavonoids   |              | anthocyanins               |                        |
|-------------|---------------|------------------------|-------------------|-----------------|-----------------|---------------|----------------------|--------------------|--------------------|--------------|--------------|----------------------------|------------------------|
|             |               |                        | Shikimate         | Quinate         | Tyramine        | Dopamine      | Putrescine           | Agmatine           | Decanol            | Naringin     | Genistin     | Cyanidin 3,5-O diglucoside | Malvidin 3-O glucoside |
| CbHQT-like  | Coumaroyl-CoA | 100 µM                 | 0.037 ±0.008      | 4.763 ±2.812    | 0.023 ±0.003    | 0.021 ±0.001  | 0.016 ±0.006         | 0.024 ±0.003       | 0.015 ±0.001       | 0.028 ±0.006 | 0.434 ±0.237 | 0.001 ±0.000               | 0.001 ±0.001           |
| CbHQT-like* | Coumaroyl-CoA | 1 mM                   | 6.956 ±0.476      | 565.346 ±59.314 | 6.322 ±0.835    | 16.998 ±3.392 | 9.289 ±2.779         | 4.469 ±1.269       | 0.603 ±0.056       | n.t.         | n.t.         | n.t.                       | n.t.                   |
| MeHFT       | Coumaroyl-CoA | 100 µM                 | 0.052 ±0.008      | 0.003 ±0.001    | 0.083 ±0.026    | 0.134 ±0.015  | 0.037 ±0.006         | 0.025 ±0.007       | 0.000 ±0.000       | 0.067 ±0.013 | 0.193 ±0.028 | 0.009 ±0.001               | 0.180 ±0.014           |
| MeHFT       | Feruloyl-CoA  | 100 µM                 | n.t.              | n.t.            | n.t.            | n.t.          | n.t.                 | n.t.               | 8.302 ±0.000       | 0.041 ±0.004 | 0.336 ±0.040 | 0.191 ±0.173               | 2.588 ±0.083           |
| MeHFT*      | Feruloyl-CoA  | 1 mM                   | n.d.              | n.d.            | 2.014 ±0.066    | 0.967 ±0.101  | 0.296 ±0.032         | 0.286 ±0.007       | n.t.               | n.t.         | n.t.         | n.t.                       | n.t.                   |
| SIACT       | Coumaroyl-CoA | 100 µM                 | 0.006 ±0.001      | 0.009 ±0.001    | 0.050 ±0.007    | 0.054 ±0.002  | 22.673 ±3.164        | 6.476 ±0.455       | 0.018 ±0.003       | 0.022 ±0.006 | 0.065 ±0.113 | 0.002 ±0.001               | 0.008 ±0.002           |
| SIACT*      | Coumaroyl-CoA | 1 mM                   | 1.386 ±0.433      | 1.854 ±0.679    | 10.576 ±1.632   | 17.718 ±7.195 | 3.614 042 ±1.216 789 | 1.075 305 ±141.838 | 0.715 ±0.139       | n.t.         | n.t.         | n.t.                       | n.t.                   |
| SIHCT       | Coumaroyl-CoA | 100 µM                 | 65.378 ±14.824    | 70.896 ±17.802  | 2.238 ±0.292    | 1.093 ±0.136  | 0.057 ±0.014         | 0.027 ±0.007       | n.t.               | 0.078 ±0.022 | 0.228 ±0.079 | 0.210 ±0.052               | 6.497 ±1.347           |
| SIHQT       | Coumaroyl-CoA | 100 µM                 | 21.658 ±1.838     | 160.828 ±27.189 | 0.041 ±0.009    | 0.093 ±0.033  | 0.056 ±0.006         | 0.030 ±0.004       | n.t.               | 0.102 ±0.008 | 0.169 ±0.009 | 0.012 ±0.002               | 0.015 ±0.011           |
| EcHQT       | Coumaroyl-CoA | 100 µM                 | 9.695 ±1.284      | 132.568 ±7.899  | 0.034 ±0.004    | 0.055 ±0.008  | 0.111 ±0.091         | 0.035 ±0.015       | n.t.               | 0.040 ±0.004 | 0.557 ±0.629 | 0.001 ±0.000               | 0.002 ±0.001           |
| EcCS        | Coumaroyl-CoA | 100 µM                 | 25.098 ±3.043     | 94.034 ±8.898   | 0.025 ±0.003    | 0.033 ±0.005  | 0.021 ±0.001         | 0.025 ±0.002       | n.t.               | 0.031 ±0.021 | 0.188 ±0.049 | 0.001 ±0.000               | 0.002 ±0.000           |
| AIMAT       | Malonyl-CoA   | 100 µM                 | n.d.              | n.d.            | n.d.            | 0.005 ±0.005  | n.d.                 | n.d.               | n.t.               | 0.042 ±0.015 | n.d.         | 1.576 ±0.317               | 0.943 ±0.147           |
| Gmf7MAT     | Malonyl-CoA   | 100 µM                 | n.d.              | 0.039 ±0.050    | n.d.            | n.d.          | n.d.                 | 0.017 ±0.015       | n.t.               | 0.043 ±0.011 | 0.638 ±0.049 | 0.004 ±0.001               | 0.029 ±0.020           |
| Dm3MAT3     | Malonyl-CoA   | 100 µM                 | n.d.              | n.d.            | n.d.            | 0.002 ±0.003  | n.d.                 | 0.195 ±0.041       | n.t.               | 0.000 ±0.000 | 1.229 ±0.116 | 2.683 ±0.163               | 13.088 ±4.568          |
| Dm3MAT3     | Coumaroyl-CoA | 100 µM                 | n.d.              | n.d.            | n.t.            | n.t.          | n.t.                 | n.t.               | n.t.               | n.t.         | n.t.         | n.t.                       | n.t.                   |
| Pc3MAT3     | Malonyl-CoA   | 100 µM                 | n.d.              | 0.016 ±0.007    | n.d.            | n.d.          | n.d.                 | n.d.               | n.t.               | 0.057 ±0.014 | 0.030 ±0.006 | 3.751 ±0.888               | 106.980 ±3.216         |
| Mock        | Coumaroyl-CoA | 100 µM                 | 0.597 ±0.049      | 0.940 ±0.367    | 0.047 ±0.001    | 0.093 ±0.026  | 0.034 ±0.002         | 0.023 ±0.003       | 0.001 ±0.002       | 0.071 ±0.011 | 0.296 ±0.200 | 0.017 ±0.004               | 0.018 ±0.007           |
| Mock*       | Coumaroyl-CoA | 1 mM                   | 22.757 ±3.350     | 0.212 ±0.084    | 6.016 ±0.530    | 14.886 ±4.448 | 3.156 ±2.660         | 4.539 ±0.643       | 0.111 ±0.000       | n.t.         | n.t.         | n.t.                       | n.t.                   |
| Mock        | Malonyl-CoA   | 100 µM                 | n.d.              | n.d.            | n.d.            | n.d.          | n.d.                 | n.d.               | n.t.               | 0.039 ±0.005 | 0.000 ±0.000 | 0.003 ±0.000               | 0.006 ±0.001           |
| MeHFT       | Feruloyl-CoA  | 100 µM                 | n.d.              | n.d.            | 0.045 ±0.004    | n.d.          | 0.189 ±0.005         | 0.124 ±0.070       | n.d.               | n.t.         | n.t.         | n.t.                       | n.t.                   |
| Mock*       | Feruloyl-CoA  | 1 mM                   | n.t.              | n.t.            | n.t.            | n.t.          | n.t.                 | n.t.               | n.t.               | 0.006 ±0.001 | 0.014 ±0.004 | 0.064 ±0.040               | 0.057 ±0.007           |

**B**

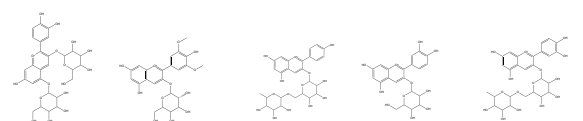

| Enzyme | Donor         | acceptor concentration | anthocyanins               |                        |                             |                        |                         |
|--------|---------------|------------------------|----------------------------|------------------------|-----------------------------|------------------------|-------------------------|
|        |               |                        | Cyanidin 3,5-O diglucoside | Malvidin 3-O glucoside | Pelargonidin 3-O rutinoside | Cyanidin 3-O glucoside | Cyanidin 3-O rutinoside |
| CbHCT  | Coumaroyl-CoA | 100 µM                 | 0.063 ±0.015               | 0.111 ±0.024           | 1.337 ±0.112                | 1.341 ±0.354           | 0.133 ±0.028            |
| MeHFT  | Feruloyl-CoA  | 100 µM                 | 0.191 ±0.173               | 2.588 ±0.083           | 54.127 ±6.146               | 3.243 ±0.468           | 0.431 ±0.101            |
| SIACT  | Coumaroyl-CoA | 100 µM                 | 0.059 ±0.014               | 0.105 ±0.085           | 1.143 ±0.256                | 0.549 ±0.228           | 0.053 ±0.052            |
| SIACT  | Malonyl-CoA   | 100 µM                 | 0.002 ±0.001               | 0.000 ±0.000           | 0.001 ±0.001                | 0.007 ±0.003           | 0.011 ±0.000            |
| SIHCT  | Coumaroyl-CoA | 100 µM                 | 1.127 ±0.332               | 38.458 ±19.705         | 0.908 ±0.313                | 2.445 ±0.955           | 1.550 ±2.472            |
| SIHQT  | Malonyl-CoA   | 100 µM                 | 0.001 ±0.000               | 0.000 ±0.000           | 0.001 ±0.000                | 0.033 ±0.047           | 0.007 ±0.001            |
| EcHQT  | Coumaroyl-CoA | 100 µM                 | 0.037 ±0.064               | 0.060 ±0.103           | 0.443 ±0.768                | 0.726 ±1.258           | 0.080 ±0.070            |
| Mock   | Coumaroyl-CoA | 100 µM                 | 0.063 ±0.057               | 0.166 ±0.007           | 0.987 ±0.069                | 0.770 ±0.169           | 0.121 ±0.048            |
| Mock   | Feruloyl-CoA  | 100 µM                 | 0.064 ±0.040               | 0.057 ±0.007           | 0.052 ±0.025                | 0.915 ±0.049           | 0.000 ±0.000            |
| Mock   | Malonyl-CoA   | 100 µM                 | 0.000 ±0.000               | 0.000 ±0.000           | 0.000 ±0.000                | 0.000 ±0.000           | 0.000 ±0.000            |

**C**

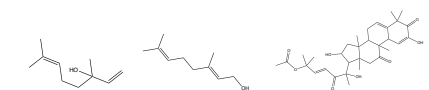

| Enzyme     | Donor         | acceptor concentration | Monoterpenoids |                | Triterpenoids   |
|------------|---------------|------------------------|----------------|----------------|-----------------|
|            |               |                        | Linalool       | Geraniol       | Curcubitacine E |
| CbHQT-like | Coumaroyl-CoA | 100 µM                 | 3.383 ±0.358   | 0.000 ±0.000   | 0.436 ±0.042    |
| MeHFT      | Feruloyl-CoA  | 100 µM                 | 0.034 ±0.011   | 45.255 ±20.153 | 10.589 ±0.421   |
| SIHCT      | Coumaroyl-CoA | 100 µM                 | 2.350 ±0.034   | 1.386 ±0.307   | 10.975 ±0.466   |
| SIHQT      | Coumaroyl-CoA | 100 µM                 | 2.893 ±0.163   | 0.000 ±0.000   | 0.529 ±0.029    |
| Dm3MAT3    | Malonyl-CoA   | 100 µM                 | 3.952 ±0.643   | 3.900 ±0.334   | 0.000 ±0.000    |
| Mock       | Coumaroyl-CoA | 100 µM                 | 2.742 ±0.399   | 0.000 ±0.000   | 0.651 ±0.193    |
| Mock       | Feruloyl-CoA  | 100 µM                 | 0.095 ±0.031   | 0.101 ±0.020   | 1.236 ±0.081    |
| Mock       | Malonyl-CoA   | 100 µM                 | 4.217 ±0.580   | 4.497 ±0.689   | 0.000 ±0.000    |

**Figure S2. Specific activities of selected enzymes against representative substrates.** Enzymes are ordered by the phylogenetic relationship to each other, starting with the most basal at the top. The average enzyme activity and standard deviation of three technical replicates is given as nmol/mg/min. Each enzyme was tested with its preferred donor substrate (300 µM) and 100 µM of the acceptor substrate. Main activities for each enzyme are colored dark red, medium activities in orange, and low/trace activities in light red. Each activity considered had to be three times higher than the respective Mock control (empty vector). **(A)** Enzyme activities of selected enzymes against a large panel of substrates. In case of EcCS, coumaroyl-CoA was used instead of benzoyl-CoA which had been shown to be used previously. MeHFT was assayed with coumaroyl-CoA and feruloyl-CoA. n.d. = not detected n.t. = not tested. \* = higher acceptor substrate concentration than other assays. In addition to the shown activities, all enzymes were tested with glucose and sucrose as acceptor substrates but no activities were observed. **(B)** Enzyme assays testing the ability of selected enzymes to acylate anthocyanins with their preferred donor. To exclude that such enzymes can acylate anthocyanins with a different donor, SIHQT and SIACT were also tested with malonyl-CoA, a donor not previously shown to be used by those enzymes. As expected, changing the donor did not allow those enzymes to acylate anthocyanins. **(C)** Enzyme assays testing the ability to use terpenoids. Two monoterpenoids and one triterpenoid were tested using different enzymes with their preferred donor. Mock controls for each donor were performed to exclude the unspecific formation of the analyzed reaction products.

**Figure S3**

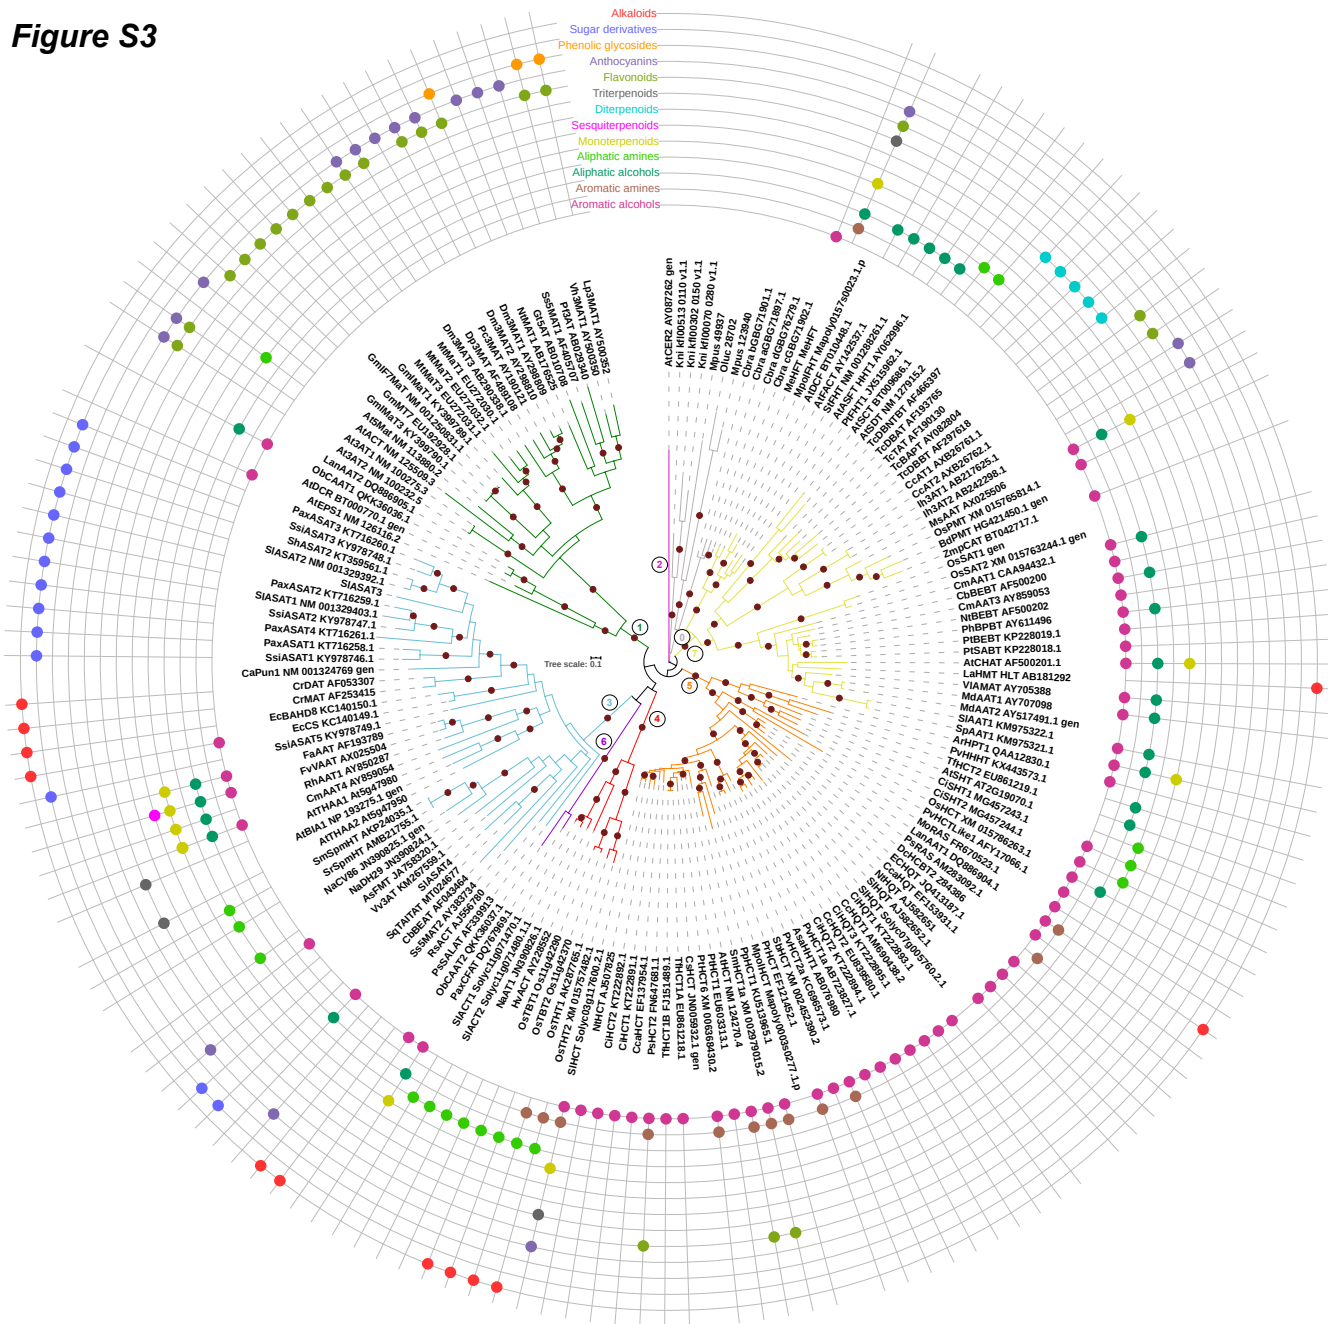

**Figure S3. Defining BAHD clades.** The tree was rooted using the algal enzyme clade (Clade 0a). Maroon circles on branches refer to clades with bootstrap values > 70. Clades were defined based on deepest, high-confidence monophyletic clades. Clades 1-4 are same as D'Auria et al, 2006 definitions, while Clade V from that study is divided into Clades 5-7 here, based on the above criterion. Branch colors indicate the different clades. Branch lengths indicate number of amino acid substitutions per site.



**Figure S4**

**A**

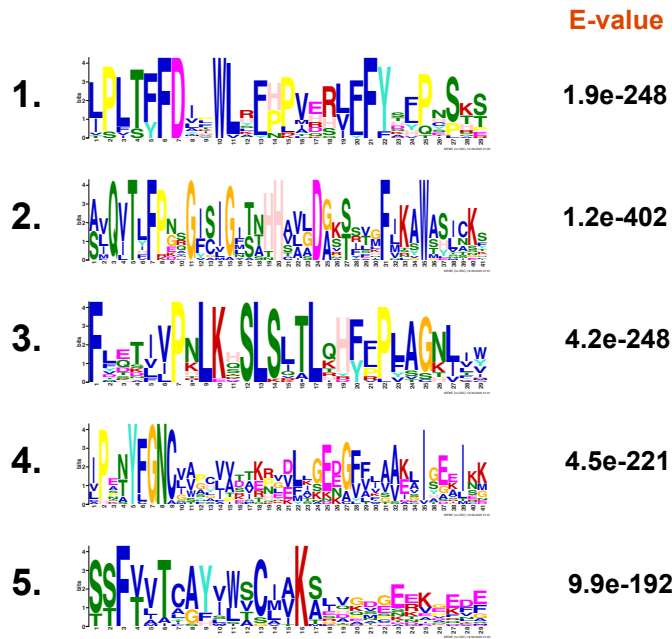

**B**

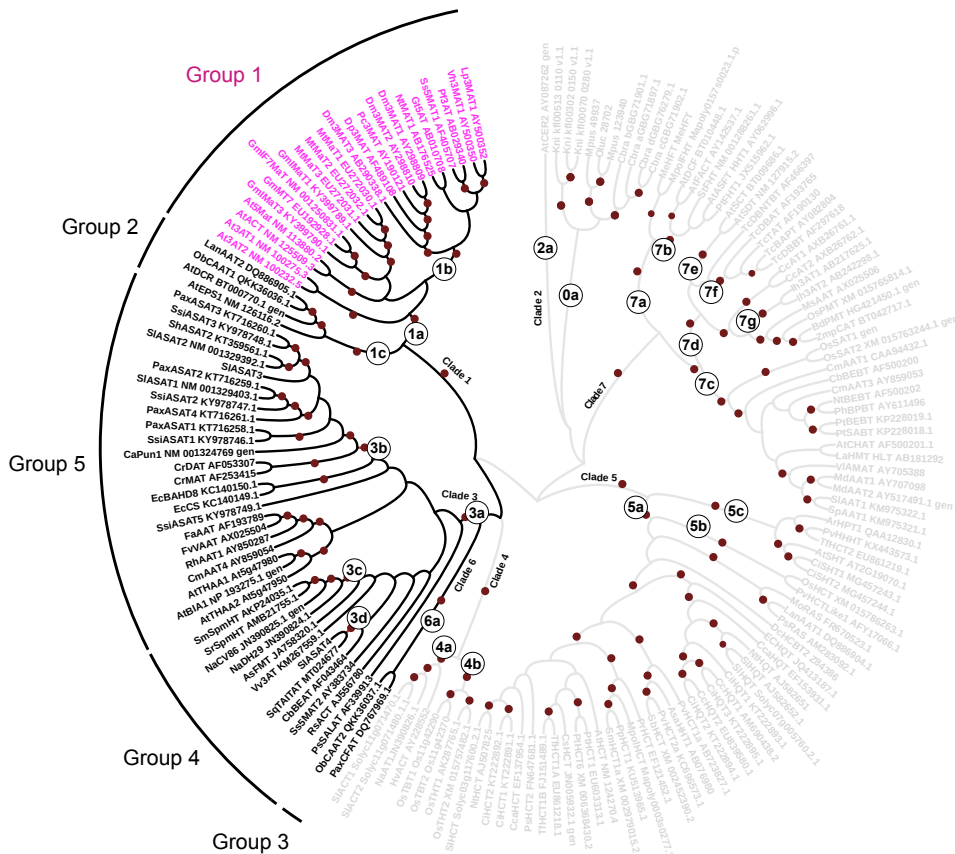

**Figure S4. Sequences used for motif enrichment analysis. (A)** Five top most enriched motifs in anthocyanin/flavonoid-acylating BAHD acyltransferases. **(B)** Groups of sequences that were further analyzed with respect to the TFFDxxW (1. motif) and YFGNC (4. motif). The same tree as in **Fig. 4** is shown. Black circles on branches refer to clades with bootstrap values > 70. Clades not analyzed in more detail are displayed in light gray and bootstrap values are not indicated. Groups of sequences correspond to **Fig. 4**. Group 5, highlighted in purple, contains the sequences of anthocyanin/flavonoid-acylating BAHDs that were analyzed in more detail.

**Figure S5**

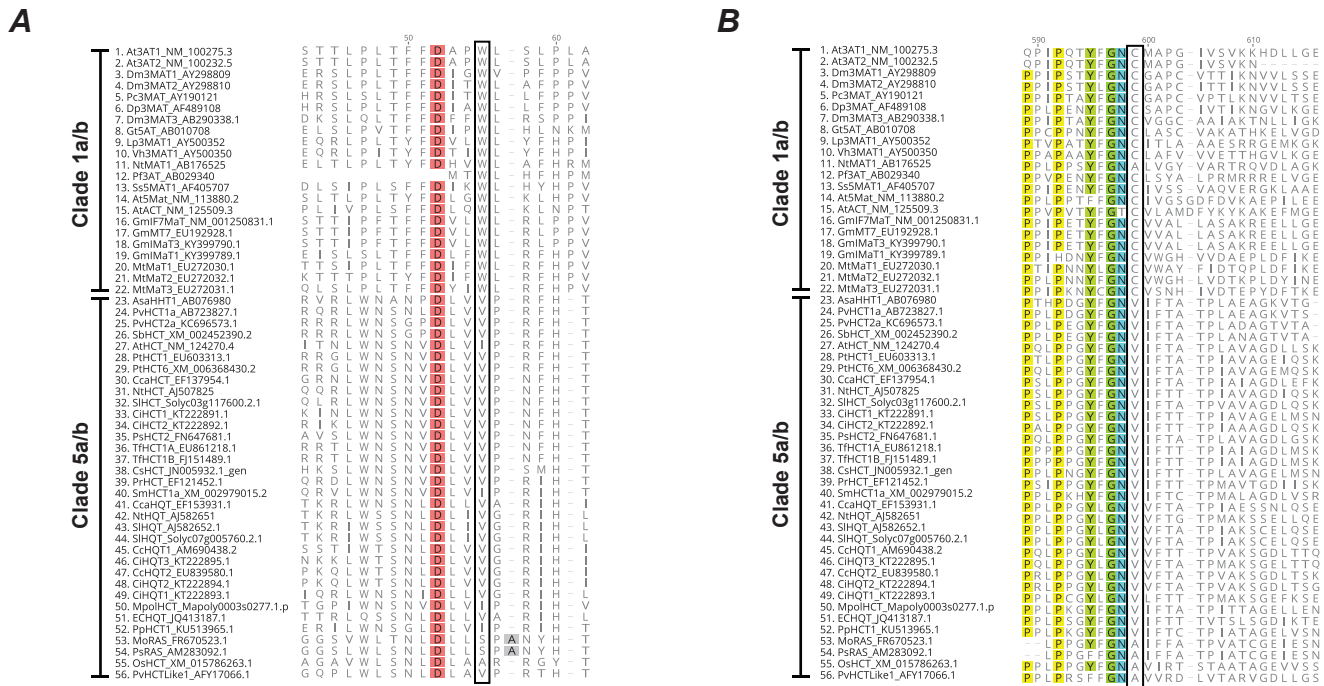

**Figure S5. Alignment of HCT/HQT-like and anthocyanin/flavonoid-acylating BAHDs. (A)** Alignment of the TFFDxxW region of sequences belonging to clade 1a/b (anthocyanin/flavonoid) and 5a/b (HCT/HQT). **(B)** Alignment of the same sequences for the YFGNC region. Conserved (95%) residues are highlighted in colors. The positions of the highly conserved Trp and Cys residues are highlighted with a box.

## Figure S6

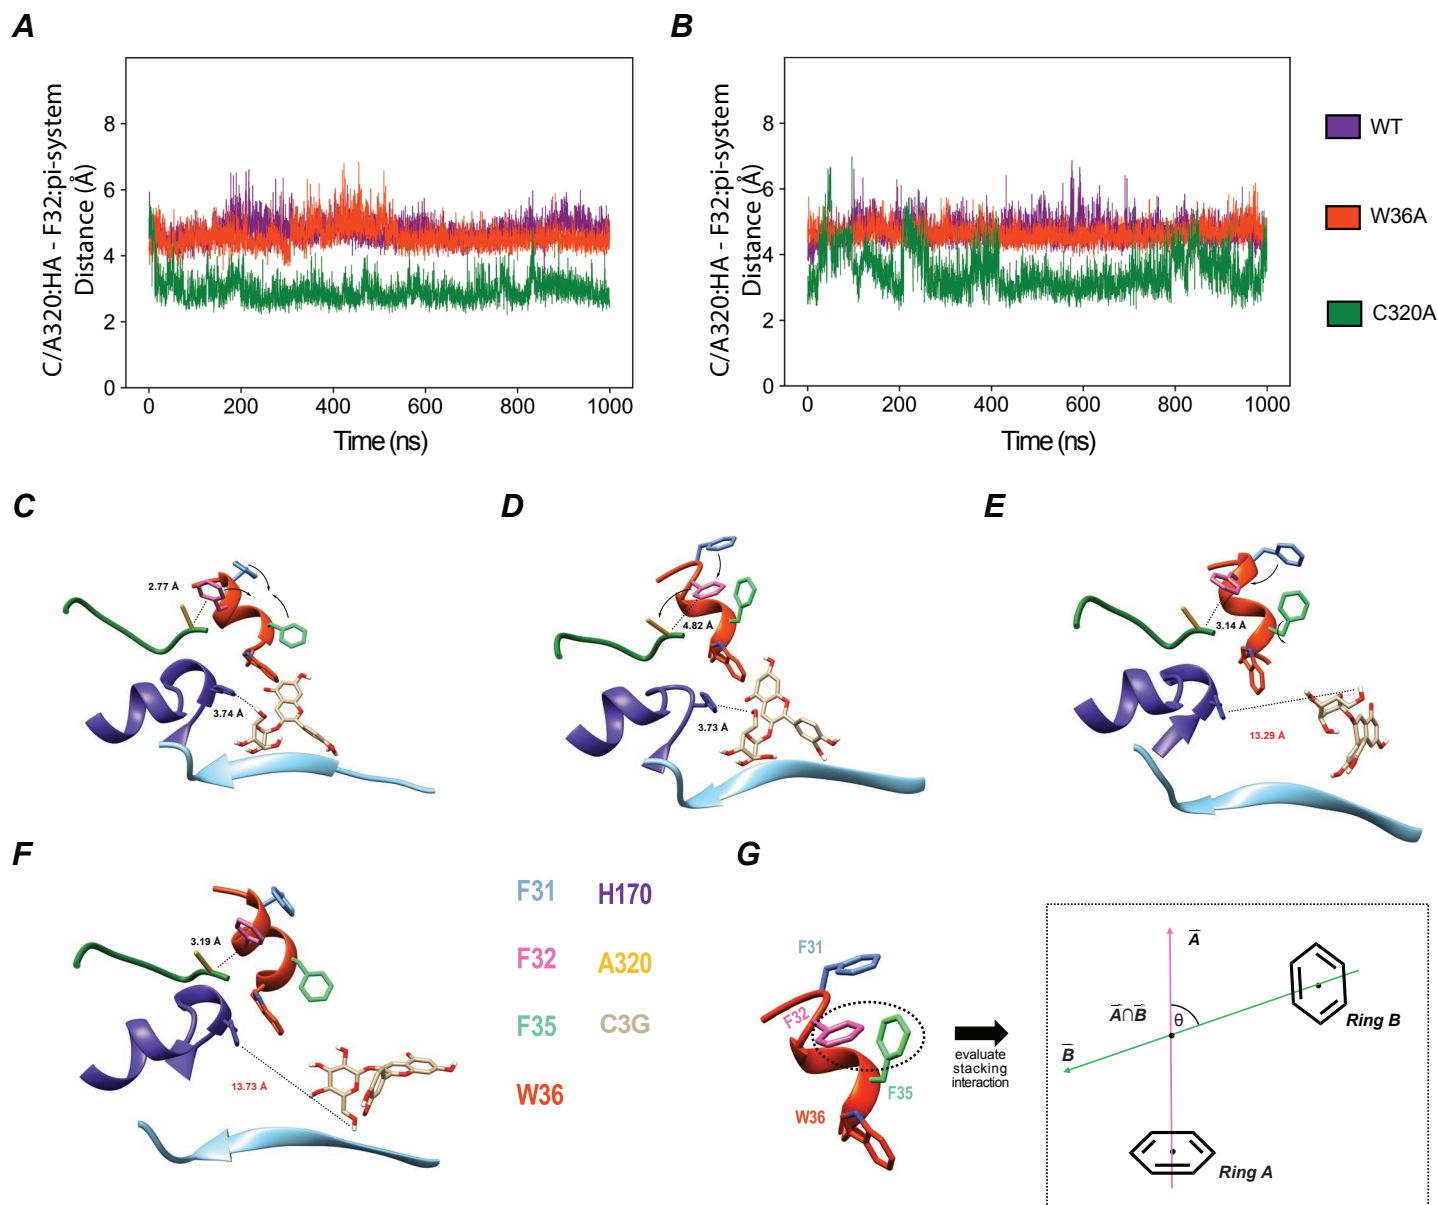

**Figure S6. Analysis of distance fluctuations in Dm3MAT3 variants.** (A) Distance calculations between backbone hydrogen of C/A320 and the center of mass of the aromatic ring of F32 for the apo simulation. WT is represented as purple, W36A is represented as orange-red, and C320A is represented as green. (B) Distance calculations for the holo simulation (C) Stacking rearrangements of phenylalanine aromatic sidechains within the TFFDXXW motif of C320A Dm3Mat3. Amino acid coloring: F31, cornflower blue; F32, hot pink; F35, spring green; W36, H170, A320, and C3G are colored as in previous images. Malonyl-CoA and W383 are hidden for simplicity. Distance fluctuations between A320 alpha hydrogen and F32 aromatic system cause aromatic stacking reorganization in the TFFDXXW motif. A catalytically competent distance between C3G-6''-OH and H170 is maintained. (D) C3G can still undergo reaction as F35 breaks its t-stacking with W36 to stabilize F31 and F32. (E) F31 and F32 have been stabilized. F32 moves closer to A320 while F35 returns to t-stack with W36, although C3G has distanced itself from H170. (F) Stacking interactions between residues in the active site and across the TFFDXXW motif have been reset, but now C3G is excluded from re-entering the active site due to steric and non-conventional bonding interactions with peripheral residues. (G) Schematic demonstrating  $\theta$  calculations for discriminating between face-to-face and edge-to-face stacking interactions along the TFFDXXW motif. Figure and methodology as described in the Data Analysis subsection from the Main Text. Rings A and B represent the aromatic systems of two different residues. The normal vectors for each ring were then calculated so that the point of intersection between Rings A and B could be determined. Solving for the angle between the center of mass of Ring A, the center of mass of Ring B, and the intersection of the rings' normal vectors, allowed for the supplementary angle,  $\theta$ , to be determined. When  $\theta \leq 30^\circ$  or  $150^\circ \geq \theta$  and the distance between the aromatic systems' centers of mass is  $\leq 4.4$  Å, face-to-face stacking is occurring. When  $60^\circ \leq \theta \leq 120^\circ$  and the distance between the aromatic systems' centers of mass is  $\leq 5.5$  Å, edge-to-face stacking is occurring. When  $30^\circ < \theta < 60^\circ$  or  $120^\circ < \theta < 150^\circ$  or the distance requirements for either form of stacking are unmet, no stacking interaction is occurring.

## Figure S7

### A aC320A stackings

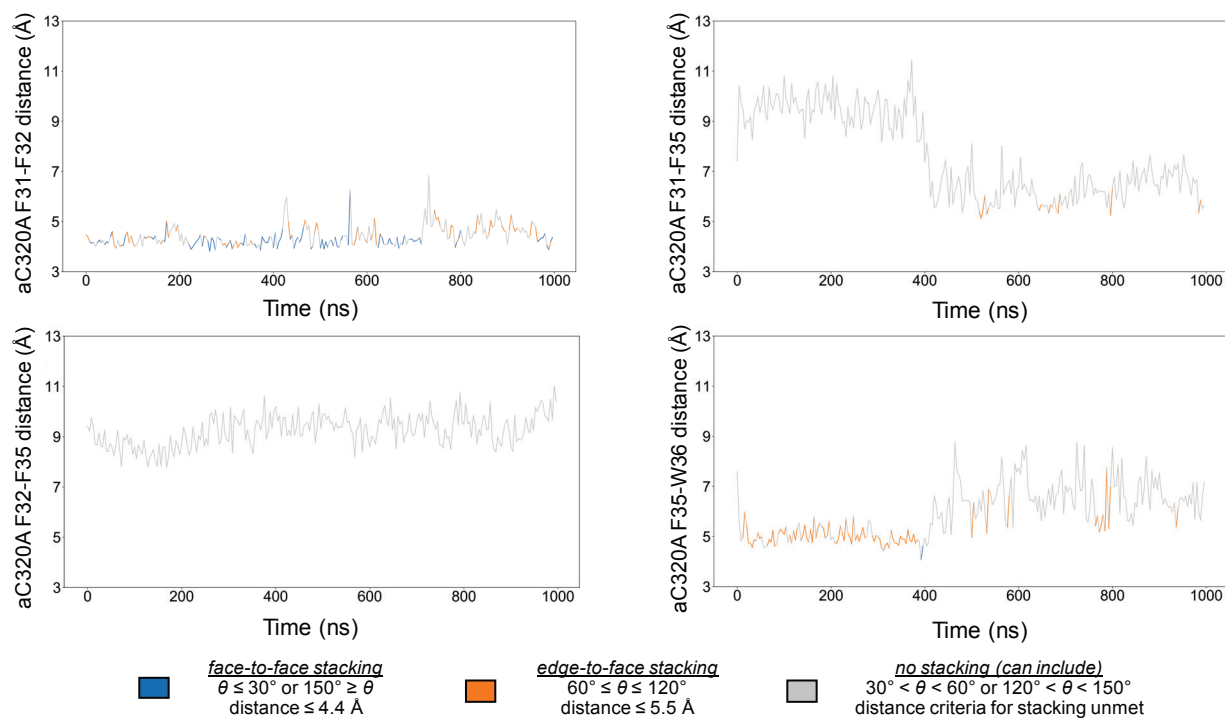

### B hC320A stackings

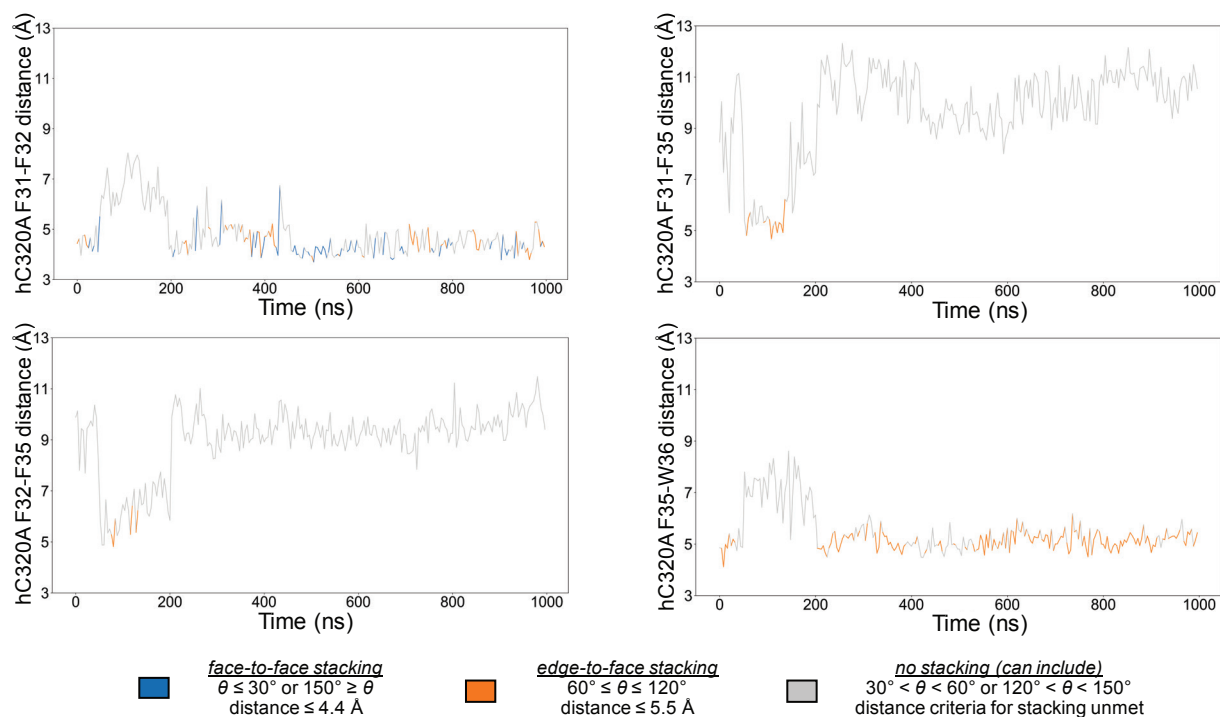

**Figure S7. Stacking interactions for the C320A mutant. (A)** Apo C320A (aC320A) stacking interactions categorized as face-to-face stacking, edge-to-face stacking, or no stacking interactions. **(B)** Holo C320A (hC320A) stacking interactions. Face-to-face stacking is represented as blue, edge-to-face stacking as orange, and no stacking as gray. Distance measurements were taken between the centers of mass of each residue listed on the y-axis of each panel.

## Figure S8

### A aW36A stacking

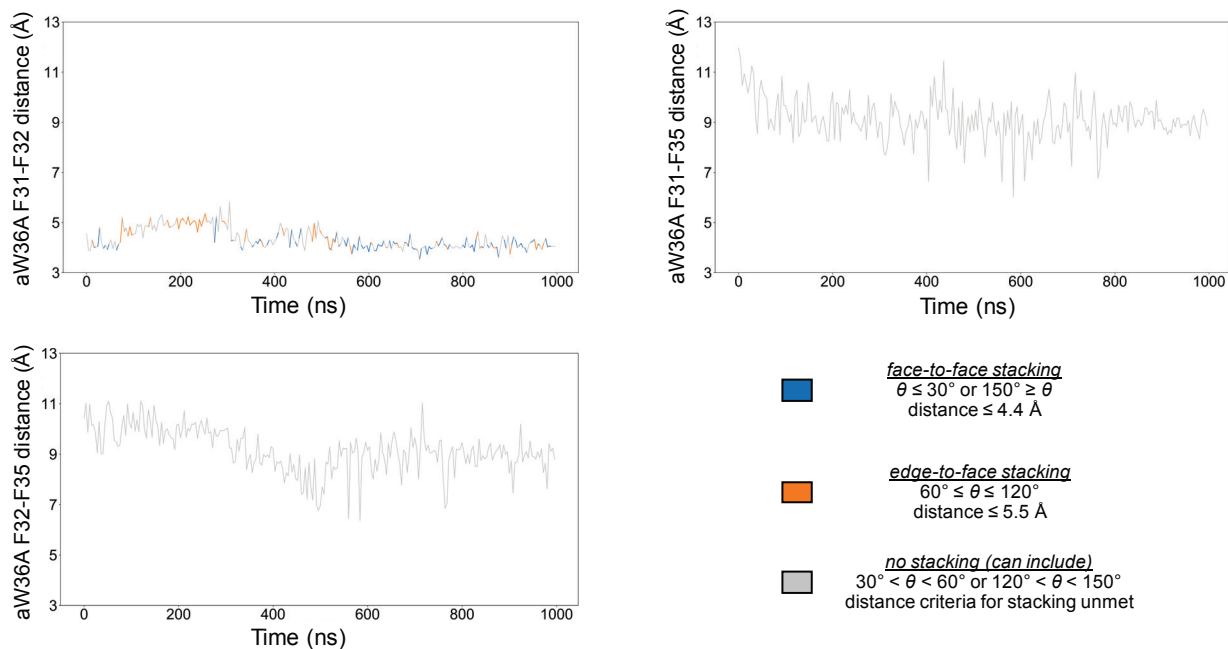

### B hW36A stacking

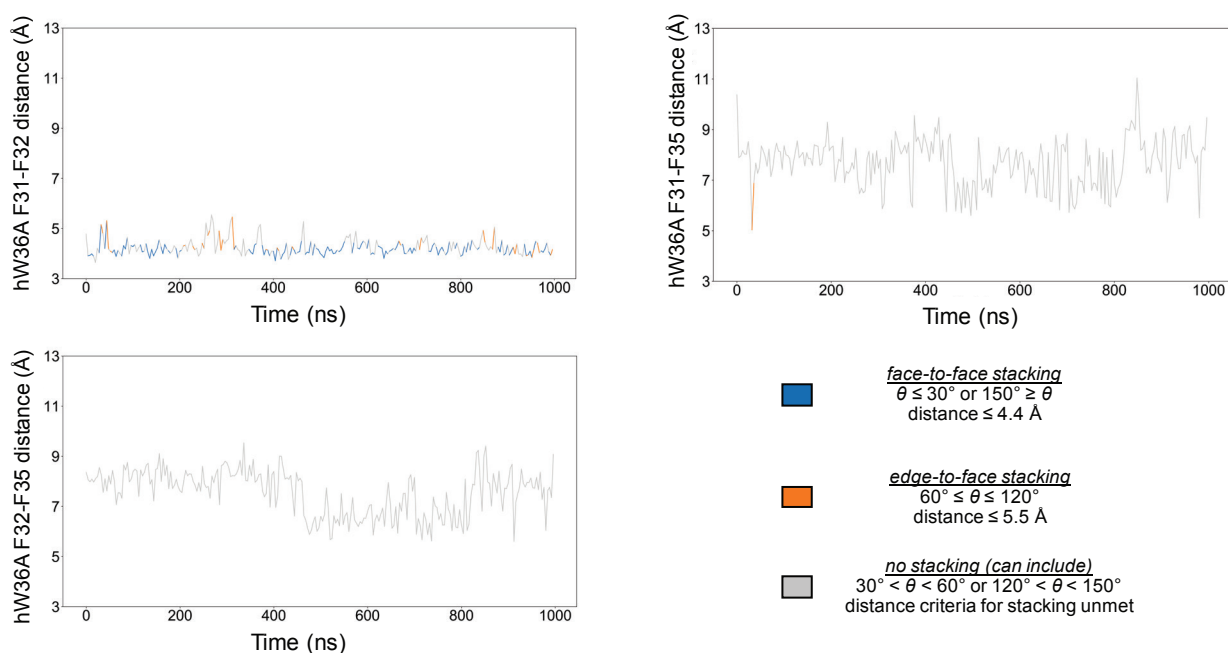

**Figure S8. Stacking interactions for the W36A mutant. (A)** Apo W36A (aW36A) stacking interactions categorized as face-to-face stacking, edge-to-face stacking, or no stacking interactions. **(B)** Holo W36A (hW36A) stacking interactions. Face-to-face stacking is represented as blue, edge-to-face stacking as orange, and no stacking as gray. Distance measurements were taken between the centers of mass of each residue listed on the y-axis of each panel. Only three panels are provided because W36A substitution prevents F35-W36 stacking from occurring.



## A aWT stackings

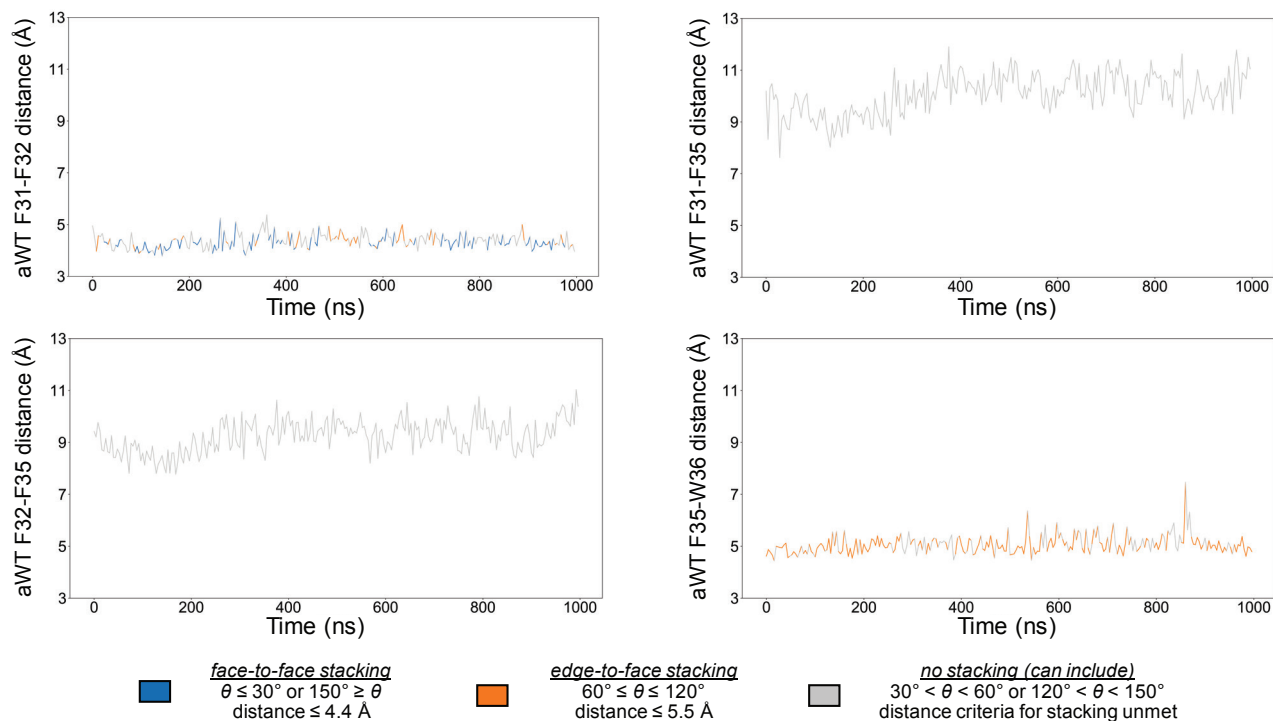

## B hWT stackings

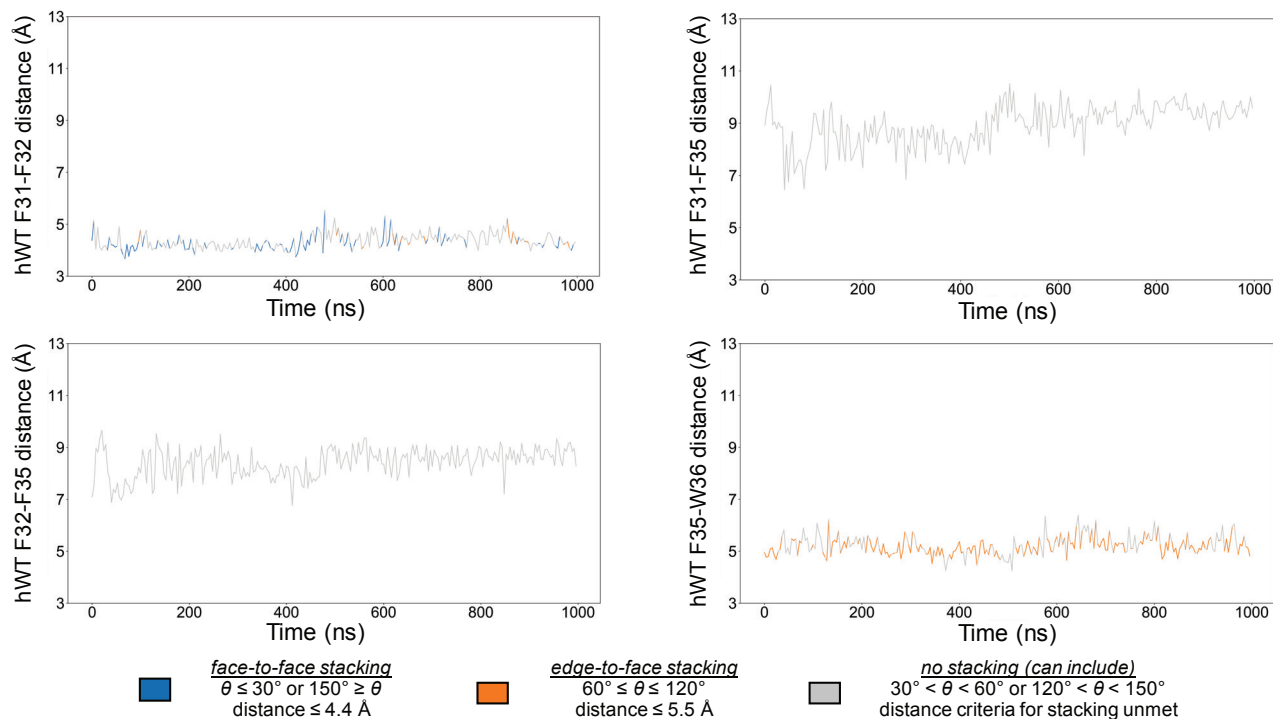

**Figure S9. Stacking interactions for the WT Dm3MAT3. (A)** Apo WT (aWT) stacking interactions categorized as face-to-face stacking, edge-to-face stacking, or no stacking interactions. **(B)** Holo WT (hWT) stacking interactions. Face-to-face stacking is represented as blue, edge-to-face stacking as orange, and no stacking as gray. Distance measurements were taken between the centers of mass of each residue listed on the y-axis of each panel.



## Figure S10

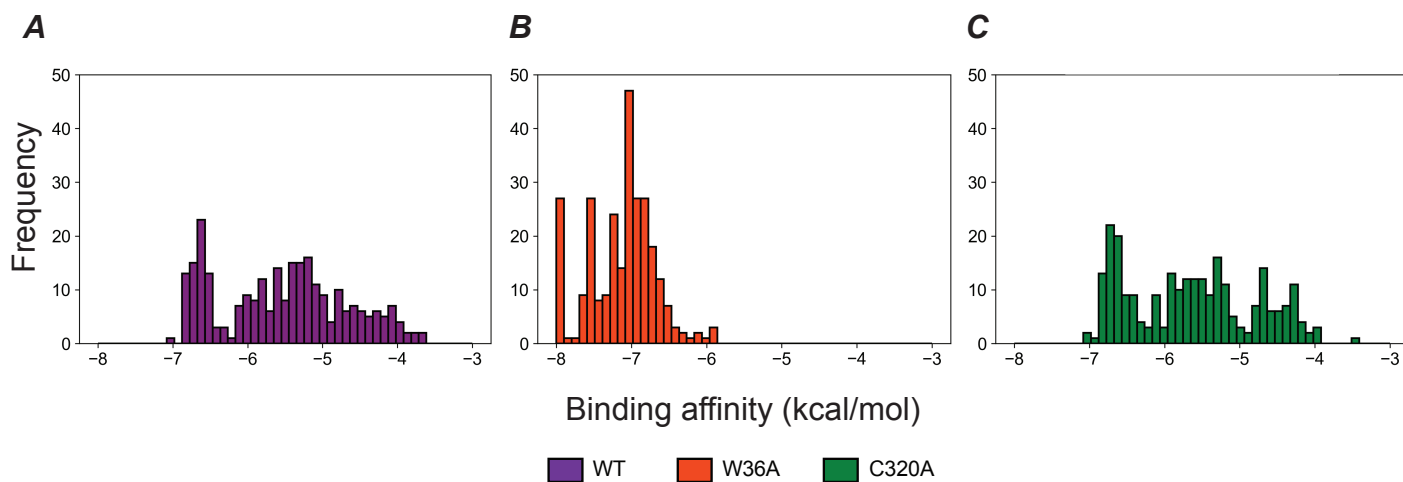

**Figure S10. Substrate docking.** Cyanidin 3-O-glucoside (C3G) docking into the Dm3MaT3 acceptor site for **(A)** WT, **(B)** W36A, and **(C)** C320A variants. WT is represented as purple, W36A is represented as orange-red, and C320A is represented as green.

## Figure S11

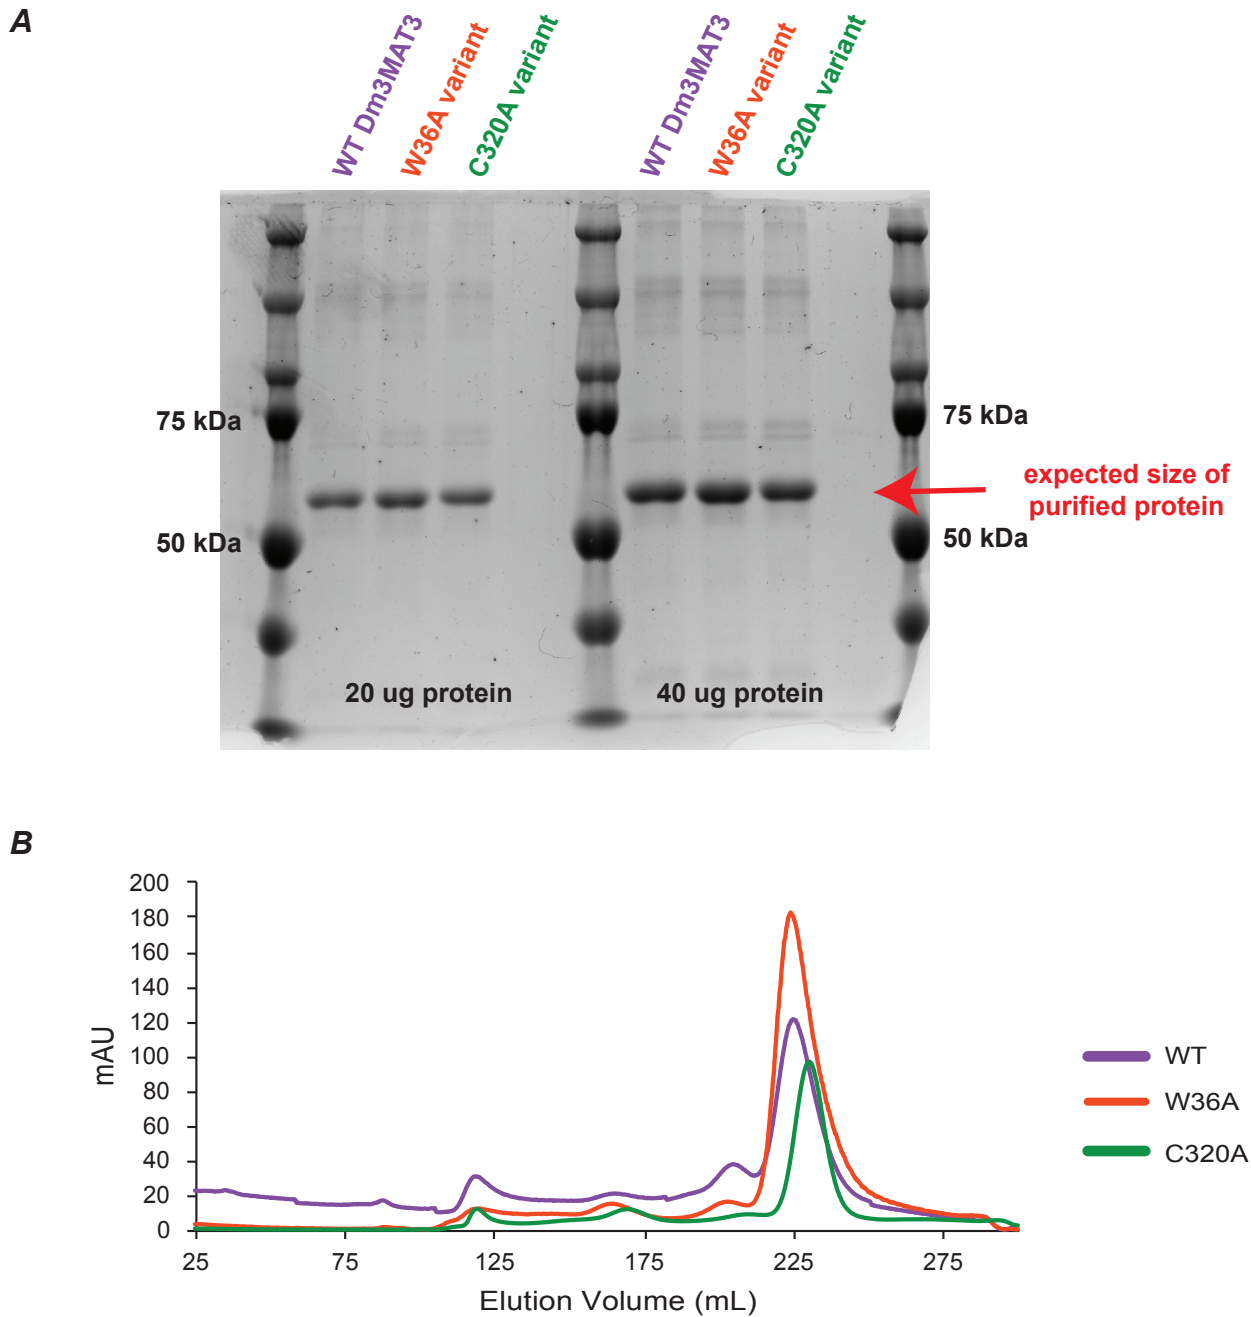

**Figure S11. SDS-PAGE and Size Exclusion Chromatography of Dm3MAT3 variants. (A)** Coomassie-stained SDS-PAGE of Dm3MAT3 variants purified to homogeneity using Ni-NTA-agarose. 20 and 40 ug protein were separated on a 12% gel. Similar migration pattern and purity for all variants was observed. **(B)** Size exclusion chromatography traces of the different Dm3MAT3 variants show that mutant proteins retain to similar elution volumes as wild-type, indicating proper size and shape of the protein.
